# Supplementary material for: TITAN: inference of copy number architectures in clonal cell populations from tumor whole-genome sequence data
Source: HighWire-hosted journal article supplement (doi:10.1101/gr.180281.114), 2014-07-24
Supplement: TITAN_Supp_Tables.zip [file table_S1.xlsx]

## Sheet: a) DG1136 HMMcopy_segments
ID	chrom	start	end	num.mark	seg.mean	state.num	state.name
DG1136a_A14248_DG1136N_A14244	1	1	47000	47	-0.066544	3	NEUT
DG1136a_A14248_DG1136N_A14244	1	47001	65000	18	-0.405907	2	HETD
DG1136a_A14248_DG1136N_A14244	1	65001	153000	88	-0.172883	3	NEUT
DG1136a_A14248_DG1136N_A14244	1	153001	234000	81	-0.30002	2	HETD
DG1136a_A14248_DG1136N_A14244	1	234001	356000	122	-0.142146	3	NEUT
DG1136a_A14248_DG1136N_A14244	1	356001	414000	58	-0.34908	2	HETD
DG1136a_A14248_DG1136N_A14244	1	414001	32207000	31793	0.109613	3	NEUT
DG1136a_A14248_DG1136N_A14244	1	32207001	32223000	16	-0.36264	2	HETD
DG1136a_A14248_DG1136N_A14244	1	32223001	91378000	59155	0.072436	3	NEUT
DG1136a_A14248_DG1136N_A14244	1	91378001	91450000	72	-0.508228	2	HETD
DG1136a_A14248_DG1136N_A14244	1	91450001	142729000	51279	0.064589	3	NEUT
DG1136a_A14248_DG1136N_A14244	1	142729001	142962000	233	-0.302021	2	HETD
DG1136a_A14248_DG1136N_A14244	1	142962001	143370000	408	-0.093766	3	NEUT
DG1136a_A14248_DG1136N_A14244	1	143370001	143497000	127	-0.29013	2	HETD
DG1136a_A14248_DG1136N_A14244	1	143497001	249251000	105754	0.070961	3	NEUT
DG1136a_A14248_DG1136N_A14244	2	1	212988000	212988	0.061348	3	NEUT
DG1136a_A14248_DG1136N_A14244	2	212988001	213000000	12	-0.636029	2	HETD
DG1136a_A14248_DG1136N_A14244	2	213000001	243200000	30200	0.073859	3	NEUT
DG1136a_A14248_DG1136N_A14244	3	1	53027000	53027	-0.469704	2	HETD
DG1136a_A14248_DG1136N_A14244	3	53027001	53039000	12	-1.27961	1	HOMD
DG1136a_A14248_DG1136N_A14244	3	53039001	61058000	8019	-0.509465	2	HETD
DG1136a_A14248_DG1136N_A14244	3	61058001	61717000	659	0.493375	4	GAIN
DG1136a_A14248_DG1136N_A14244	3	61717001	115991000	54274	0.047896	3	NEUT
DG1136a_A14248_DG1136N_A14244	3	115991001	116170000	179	-0.520323	2	HETD
DG1136a_A14248_DG1136N_A14244	3	116170001	116273000	103	0.07339	3	NEUT
DG1136a_A14248_DG1136N_A14244	3	116273001	116369000	96	-0.47615	2	HETD
DG1136a_A14248_DG1136N_A14244	3	116369001	117374000	1005	0.034149	3	NEUT
DG1136a_A14248_DG1136N_A14244	3	117374001	117499000	125	-0.553203	2	HETD
DG1136a_A14248_DG1136N_A14244	3	117499001	167576000	50077	0.067177	3	NEUT
DG1136a_A14248_DG1136N_A14244	3	167576001	189828000	22252	0.485487	4	GAIN
DG1136a_A14248_DG1136N_A14244	3	189828001	198023000	8195	0.077608	3	NEUT
DG1136a_A14248_DG1136N_A14244	4	1	21836000	21836	0.069494	3	NEUT
DG1136a_A14248_DG1136N_A14244	4	21836001	22118000	282	-0.549744	2	HETD
DG1136a_A14248_DG1136N_A14244	4	22118001	49095000	26977	0.045115	3	NEUT
DG1136a_A14248_DG1136N_A14244	4	49095001	49150000	55	-0.322046	2	HETD
DG1136a_A14248_DG1136N_A14244	4	49150001	49594000	444	-0.031346	3	NEUT
DG1136a_A14248_DG1136N_A14244	4	49594001	52661000	3067	-0.413526	2	HETD
DG1136a_A14248_DG1136N_A14244	4	52661001	130388000	77727	0.048943	3	NEUT
DG1136a_A14248_DG1136N_A14244	4	130388001	138092000	7704	-0.562087	2	HETD
DG1136a_A14248_DG1136N_A14244	4	138092001	138100000	8	0.11962	3	NEUT
DG1136a_A14248_DG1136N_A14244	4	138100001	147884000	9784	-0.527423	2	HETD
DG1136a_A14248_DG1136N_A14244	4	147884001	151278000	3394	0.053657	3	NEUT
DG1136a_A14248_DG1136N_A14244	4	151278001	151668000	390	-0.530576	2	HETD
DG1136a_A14248_DG1136N_A14244	4	151668001	191155000	39487	0.033028	3	NEUT
DG1136a_A14248_DG1136N_A14244	5	1	22506000	22506	0.05538	3	NEUT
DG1136a_A14248_DG1136N_A14244	5	22506001	40583000	18077	0.459332	4	GAIN
DG1136a_A14248_DG1136N_A14244	5	40583001	59186000	18603	0.053578	3	NEUT
DG1136a_A14248_DG1136N_A14244	5	59186001	59252000	66	-0.506156	2	HETD
DG1136a_A14248_DG1136N_A14244	5	59252001	142046000	82794	0.040714	3	NEUT
DG1136a_A14248_DG1136N_A14244	5	142046001	142124000	78	0.522345	4	GAIN
DG1136a_A14248_DG1136N_A14244	5	142124001	178981000	36857	0.069083	3	NEUT
DG1136a_A14248_DG1136N_A14244	5	178981001	180733000	1752	-0.476246	2	HETD
DG1136a_A14248_DG1136N_A14244	5	180733001	180785000	52	-0.167356	3	NEUT
DG1136a_A14248_DG1136N_A14244	5	180785001	180866000	81	-0.282632	2	HETD
DG1136a_A14248_DG1136N_A14244	5	180866001	180916000	50	-0.177762	3	NEUT
DG1136a_A14248_DG1136N_A14244	6	1	34420000	34420	0.090961	3	NEUT
DG1136a_A14248_DG1136N_A14244	6	34420001	34630000	210	0.777786	5	AMP
DG1136a_A14248_DG1136N_A14244	6	34630001	57821000	23191	0.068649	3	NEUT
DG1136a_A14248_DG1136N_A14244	6	57821001	58086000	265	0.43594	4	GAIN
DG1136a_A14248_DG1136N_A14244	6	58086001	58780000	694	0.039144	3	NEUT
DG1136a_A14248_DG1136N_A14244	6	58780001	135122000	76342	0.45923	4	GAIN
DG1136a_A14248_DG1136N_A14244	6	135122001	157183000	22061	-0.521069	2	HETD
DG1136a_A14248_DG1136N_A14244	6	157183001	157459000	276	-1.5596	1	HOMD
DG1136a_A14248_DG1136N_A14244	6	157459001	170945000	13486	-0.516728	2	HETD
DG1136a_A14248_DG1136N_A14244	6	170945001	171001000	56	-0.126199	3	NEUT
DG1136a_A14248_DG1136N_A14244	6	171001001	171116000	115	-0.351703	2	HETD
DG1136a_A14248_DG1136N_A14244	7	1	32000	32	-0.057566	3	NEUT
DG1136a_A14248_DG1136N_A14244	7	32001	151000	119	-0.394785	2	HETD
DG1136a_A14248_DG1136N_A14244	7	151001	160000	9	0.040978	3	NEUT
DG1136a_A14248_DG1136N_A14244	7	160001	4623000	4463	-0.480665	2	HETD
DG1136a_A14248_DG1136N_A14244	7	4623001	4639000	16	0.049602	3	NEUT
DG1136a_A14248_DG1136N_A14244	7	4639001	5956000	1317	-0.474176	2	HETD
DG1136a_A14248_DG1136N_A14244	7	5956001	6021000	65	-0.143086	3	NEUT
DG1136a_A14248_DG1136N_A14244	7	6021001	6194000	173	-0.490351	2	HETD
DG1136a_A14248_DG1136N_A14244	7	6194001	17151000	10957	0.047276	3	NEUT
DG1136a_A14248_DG1136N_A14244	7	17151001	17171000	20	-0.521097	2	HETD
DG1136a_A14248_DG1136N_A14244	7	17171001	38314000	21143	0.064728	3	NEUT
DG1136a_A14248_DG1136N_A14244	7	38314001	38341000	27	0.397359	4	GAIN
DG1136a_A14248_DG1136N_A14244	7	38341001	74446000	36105	0.068341	3	NEUT
DG1136a_A14248_DG1136N_A14244	7	74446001	74464000	18	0.413799	4	GAIN
DG1136a_A14248_DG1136N_A14244	7	74464001	142705000	68241	0.06327	3	NEUT
DG1136a_A14248_DG1136N_A14244	7	142705001	142715000	10	-0.486214	2	HETD
DG1136a_A14248_DG1136N_A14244	7	142715001	159139000	16424	0.071538	3	NEUT
DG1136a_A14248_DG1136N_A14244	X	1	154000	154	0.616342	5	AMP
DG1136a_A14248_DG1136N_A14244	X	154001	3779000	3625	0.494992	4	GAIN
DG1136a_A14248_DG1136N_A14244	X	3779001	3831000	52	0.204606	3	NEUT
DG1136a_A14248_DG1136N_A14244	X	3831001	35150000	31319	0.43444	4	GAIN
DG1136a_A14248_DG1136N_A14244	X	35150001	35164000	14	-0.016953	3	NEUT
DG1136a_A14248_DG1136N_A14244	X	35164001	39326000	4162	0.425134	4	GAIN
DG1136a_A14248_DG1136N_A14244	X	39326001	44778000	5452	0.020416	3	NEUT
DG1136a_A14248_DG1136N_A14244	X	44778001	44888000	110	-0.500889	2	HETD
DG1136a_A14248_DG1136N_A14244	X	44888001	155271000	110383	0.000535	3	NEUT
DG1136a_A14248_DG1136N_A14244	8	1	70000	70	-0.061992	3	NEUT
DG1136a_A14248_DG1136N_A14244	8	70001	98000	28	-0.316182	2	HETD
DG1136a_A14248_DG1136N_A14244	8	98001	156000	58	-0.058615	3	NEUT
DG1136a_A14248_DG1136N_A14244	8	156001	6836000	6680	-0.532634	2	HETD
DG1136a_A14248_DG1136N_A14244	8	6836001	6852000	16	-0.103632	3	NEUT
DG1136a_A14248_DG1136N_A14244	8	6852001	7026000	174	-0.456527	2	HETD
DG1136a_A14248_DG1136N_A14244	8	7026001	7053000	27	-0.178717	3	NEUT
DG1136a_A14248_DG1136N_A14244	8	7053001	7068000	15	-0.995602	1	HOMD
DG1136a_A14248_DG1136N_A14244	8	7068001	7112000	44	-0.414561	2	HETD
DG1136a_A14248_DG1136N_A14244	8	7112001	7153000	41	0.07973	3	NEUT
DG1136a_A14248_DG1136N_A14244	8	7153001	7253000	100	-0.55008	2	HETD
DG1136a_A14248_DG1136N_A14244	8	7253001	7448000	195	-0.103326	3	NEUT
DG1136a_A14248_DG1136N_A14244	8	7448001	7558000	110	-0.299707	2	HETD
DG1136a_A14248_DG1136N_A14244	8	7558001	7743000	185	-0.13128	3	NEUT
DG1136a_A14248_DG1136N_A14244	8	7743001	7767000	24	-0.467606	2	HETD
DG1136a_A14248_DG1136N_A14244	8	7767001	7940000	173	-0.120911	3	NEUT
DG1136a_A14248_DG1136N_A14244	8	7940001	7977000	37	-0.884211	1	HOMD
DG1136a_A14248_DG1136N_A14244	8	7977001	8003000	26	-0.095056	3	NEUT
DG1136a_A14248_DG1136N_A14244	8	8003001	11959000	3956	-0.502988	2	HETD
DG1136a_A14248_DG1136N_A14244	8	11959001	11980000	21	0.001663	3	NEUT
DG1136a_A14248_DG1136N_A14244	8	11980001	12015000	35	-0.444363	2	HETD
DG1136a_A14248_DG1136N_A14244	8	12015001	12087000	72	-0.110478	3	NEUT
DG1136a_A14248_DG1136N_A14244	8	12087001	12202000	115	-0.495918	2	HETD
DG1136a_A14248_DG1136N_A14244	8	12202001	12336000	134	-0.062139	3	NEUT
DG1136a_A14248_DG1136N_A14244	8	12336001	33887000	21551	-0.520308	2	HETD
DG1136a_A14248_DG1136N_A14244	8	33887001	33899000	12	-1.50905	1	HOMD
DG1136a_A14248_DG1136N_A14244	8	33899001	37716000	3817	-0.538774	2	HETD
DG1136a_A14248_DG1136N_A14244	8	37716001	57000000	19284	0.062183	3	NEUT
DG1136a_A14248_DG1136N_A14244	8	57000001	57013000	13	-0.431918	2	HETD
DG1136a_A14248_DG1136N_A14244	8	57013001	90027000	33014	0.048349	3	NEUT
DG1136a_A14248_DG1136N_A14244	8	90027001	90082000	55	-0.570793	2	HETD
DG1136a_A14248_DG1136N_A14244	8	90082001	97044000	6962	0.045387	3	NEUT
DG1136a_A14248_DG1136N_A14244	8	97044001	102258000	5214	0.804599	5	AMP
DG1136a_A14248_DG1136N_A14244	8	102258001	102409000	151	1.07799	6	HLAMP
DG1136a_A14248_DG1136N_A14244	8	102409001	142273000	39864	0.788425	5	AMP
DG1136a_A14248_DG1136N_A14244	8	142273001	142447000	174	1.12935	6	HLAMP
DG1136a_A14248_DG1136N_A14244	8	142447001	146365000	3918	0.848826	5	AMP
DG1136a_A14248_DG1136N_A14244	9	1	131510000	131510	0.054714	3	NEUT
DG1136a_A14248_DG1136N_A14244	9	131510001	131620000	110	0.511534	4	GAIN
DG1136a_A14248_DG1136N_A14244	9	131620001	141214000	9594	0.086479	3	NEUT
DG1136a_A14248_DG1136N_A14244	10	1	7123000	7123	0.147713	3	NEUT
DG1136a_A14248_DG1136N_A14244	10	7123001	11508000	4385	0.52794	4	GAIN
DG1136a_A14248_DG1136N_A14244	10	11508001	11952000	444	0.704446	5	AMP
DG1136a_A14248_DG1136N_A14244	10	11952001	12024000	72	0.529823	4	GAIN
DG1136a_A14248_DG1136N_A14244	10	12024001	12408000	384	0.593703	5	AMP
DG1136a_A14248_DG1136N_A14244	10	12408001	12594000	186	0.534362	4	GAIN
DG1136a_A14248_DG1136N_A14244	10	12594001	12686000	92	0.602912	5	AMP
DG1136a_A14248_DG1136N_A14244	10	12686001	13272000	586	0.558014	4	GAIN
DG1136a_A14248_DG1136N_A14244	10	13272001	13484000	212	0.596274	5	AMP
DG1136a_A14248_DG1136N_A14244	10	13484001	13697000	213	0.557861	4	GAIN
DG1136a_A14248_DG1136N_A14244	10	13697001	13907000	210	0.592195	5	AMP
DG1136a_A14248_DG1136N_A14244	10	13907001	15163000	1256	0.552746	4	GAIN
DG1136a_A14248_DG1136N_A14244	10	15163001	15309000	146	0.58902	5	AMP
DG1136a_A14248_DG1136N_A14244	10	15309001	17952000	2643	0.526069	4	GAIN
DG1136a_A14248_DG1136N_A14244	10	17952001	18158000	206	0.602083	5	AMP
DG1136a_A14248_DG1136N_A14244	10	18158001	21601000	3443	0.512218	4	GAIN
DG1136a_A14248_DG1136N_A14244	10	21601001	21656000	55	0.639551	5	AMP
DG1136a_A14248_DG1136N_A14244	10	21656001	27358000	5702	0.543088	4	GAIN
DG1136a_A14248_DG1136N_A14244	10	27358001	27551000	193	0.587312	5	AMP
DG1136a_A14248_DG1136N_A14244	10	27551001	33118000	5567	0.550845	4	GAIN
DG1136a_A14248_DG1136N_A14244	10	33118001	34666000	1548	0.146423	3	NEUT
DG1136a_A14248_DG1136N_A14244	10	34666001	42383000	7717	-0.398256	2	HETD
DG1136a_A14248_DG1136N_A14244	10	42383001	42401000	18	-0.050429	3	NEUT
DG1136a_A14248_DG1136N_A14244	10	42401001	42597000	196	-0.380024	2	HETD
DG1136a_A14248_DG1136N_A14244	10	42597001	42705000	108	-0.078112	3	NEUT
DG1136a_A14248_DG1136N_A14244	10	42705001	42953000	248	-0.350712	2	HETD
DG1136a_A14248_DG1136N_A14244	10	42953001	42964000	11	0.009021	3	NEUT
DG1136a_A14248_DG1136N_A14244	10	42964001	54278000	11314	-0.457378	2	HETD
DG1136a_A14248_DG1136N_A14244	10	54278001	75971000	21693	0.092681	3	NEUT
DG1136a_A14248_DG1136N_A14244	10	75971001	75983000	12	-0.413765	2	HETD
DG1136a_A14248_DG1136N_A14244	10	75983001	77728000	1745	0.082458	3	NEUT
DG1136a_A14248_DG1136N_A14244	10	77728001	79711000	1983	0.495315	4	GAIN
DG1136a_A14248_DG1136N_A14244	10	79711001	84192000	4481	0.080486	3	NEUT
DG1136a_A14248_DG1136N_A14244	10	84192001	101647000	17455	-0.513864	2	HETD
DG1136a_A14248_DG1136N_A14244	10	101647001	105079000	3432	0.09946	3	NEUT
DG1136a_A14248_DG1136N_A14244	10	105079001	133865000	28786	-0.51516	2	HETD
DG1136a_A14248_DG1136N_A14244	10	133865001	135535000	1670	0.116702	3	NEUT
DG1136a_A14248_DG1136N_A14244	11	1	131000	131	-0.138324	3	NEUT
DG1136a_A14248_DG1136N_A14244	11	131001	183000	52	-0.381544	2	HETD
DG1136a_A14248_DG1136N_A14244	11	183001	198000	15	-0.080992	3	NEUT
DG1136a_A14248_DG1136N_A14244	11	198001	965000	767	-0.451817	2	HETD
DG1136a_A14248_DG1136N_A14244	11	965001	1068000	103	0.104706	3	NEUT
DG1136a_A14248_DG1136N_A14244	11	1068001	4968000	3900	-0.469911	2	HETD
DG1136a_A14248_DG1136N_A14244	11	4968001	4977000	9	0.040831	3	NEUT
DG1136a_A14248_DG1136N_A14244	11	4977001	9793000	4816	-0.503693	2	HETD
DG1136a_A14248_DG1136N_A14244	11	9793001	58837000	49044	0.062382	3	NEUT
DG1136a_A14248_DG1136N_A14244	11	58837001	58881000	44	-0.525412	2	HETD
DG1136a_A14248_DG1136N_A14244	11	58881001	59646000	765	0.055938	3	NEUT
DG1136a_A14248_DG1136N_A14244	11	59646001	122952000	63306	0.407712	4	GAIN
DG1136a_A14248_DG1136N_A14244	11	122952001	128744000	5792	0.066309	3	NEUT
DG1136a_A14248_DG1136N_A14244	11	128744001	131516000	2772	0.490191	4	GAIN
DG1136a_A14248_DG1136N_A14244	11	131516001	135007000	3491	0.719477	5	AMP
DG1136a_A14248_DG1136N_A14244	12	1	81000	81	0.132949	3	NEUT
DG1136a_A14248_DG1136N_A14244	12	81001	146000	65	0.36068	4	GAIN
DG1136a_A14248_DG1136N_A14244	12	146001	9633000	9487	-0.492433	2	HETD
DG1136a_A14248_DG1136N_A14244	12	9633001	9734000	101	0.11222	3	NEUT
DG1136a_A14248_DG1136N_A14244	12	9734001	11217000	1483	-0.520469	2	HETD
DG1136a_A14248_DG1136N_A14244	12	11217001	11250000	33	-1.23695	1	HOMD
DG1136a_A14248_DG1136N_A14244	12	11250001	23472000	12222	-0.52314	2	HETD
DG1136a_A14248_DG1136N_A14244	12	23472001	115419000	91947	0.065405	3	NEUT
DG1136a_A14248_DG1136N_A14244	12	115419001	122198000	6779	0.500693	4	GAIN
DG1136a_A14248_DG1136N_A14244	12	122198001	122320000	122	0.585887	5	AMP
DG1136a_A14248_DG1136N_A14244	12	122320001	124843000	2523	0.523583	4	GAIN
DG1136a_A14248_DG1136N_A14244	12	124843001	125010000	167	0.595963	5	AMP
DG1136a_A14248_DG1136N_A14244	12	125010001	132631000	7621	0.488888	4	GAIN
DG1136a_A14248_DG1136N_A14244	12	132631001	132955000	324	0.580371	5	AMP
DG1136a_A14248_DG1136N_A14244	12	132955001	133852000	897	0.503198	4	GAIN
DG1136a_A14248_DG1136N_A14244	13	1	34135000	34135	-0.517382	2	HETD
DG1136a_A14248_DG1136N_A14244	13	34135001	34145000	10	-1.44159	1	HOMD
DG1136a_A14248_DG1136N_A14244	13	34145001	38072000	3927	-0.523645	2	HETD
DG1136a_A14248_DG1136N_A14244	13	38072001	38086000	14	-1.55698	1	HOMD
DG1136a_A14248_DG1136N_A14244	13	38086001	86283000	48197	-0.538859	2	HETD
DG1136a_A14248_DG1136N_A14244	13	86283001	115170000	28887	0.061695	3	NEUT
DG1136a_A14248_DG1136N_A14244	14	1	19080000	19080	-0.198143	3	NEUT
DG1136a_A14248_DG1136N_A14244	14	19080001	19123000	43	-0.256912	2	HETD
DG1136a_A14248_DG1136N_A14244	14	19123001	21680000	2557	0.04723	3	NEUT
DG1136a_A14248_DG1136N_A14244	14	21680001	21801000	121	-0.51362	2	HETD
DG1136a_A14248_DG1136N_A14244	14	21801001	22549000	748	0.111698	3	NEUT
DG1136a_A14248_DG1136N_A14244	14	22549001	22965000	416	0.348487	4	GAIN
DG1136a_A14248_DG1136N_A14244	14	22965001	56965000	34000	0.047007	3	NEUT
DG1136a_A14248_DG1136N_A14244	14	56965001	73997000	17032	-0.50498	2	HETD
DG1136a_A14248_DG1136N_A14244	14	73997001	74024000	27	0.038068	3	NEUT
DG1136a_A14248_DG1136N_A14244	14	74024001	99165000	25141	-0.517182	2	HETD
DG1136a_A14248_DG1136N_A14244	14	99165001	107350000	8185	0.095864	3	NEUT
DG1136a_A14248_DG1136N_A14244	15	1	20200000	20200	-0.475481	2	HETD
DG1136a_A14248_DG1136N_A14244	15	20200001	20260000	60	-0.836817	1	HOMD
DG1136a_A14248_DG1136N_A14244	15	20260001	20837000	577	-0.603481	2	HETD
DG1136a_A14248_DG1136N_A14244	15	20837001	20892000	55	-0.786035	1	HOMD
DG1136a_A14248_DG1136N_A14244	15	20892001	21061000	169	-0.68778	2	HETD
DG1136a_A14248_DG1136N_A14244	15	21061001	21284000	223	-0.800447	1	HOMD
DG1136a_A14248_DG1136N_A14244	15	21284001	21397000	113	-0.544158	2	HETD
DG1136a_A14248_DG1136N_A14244	15	21397001	22285000	888	-0.790746	1	HOMD
DG1136a_A14248_DG1136N_A14244	15	22285001	24673000	2388	-0.526865	2	HETD
DG1136a_A14248_DG1136N_A14244	15	24673001	24723000	50	-0.477364	1	HOMD
DG1136a_A14248_DG1136N_A14244	15	24723001	76885000	52162	-0.509452	2	HETD
DG1136a_A14248_DG1136N_A14244	15	76885001	76897000	12	0.156792	3	NEUT
DG1136a_A14248_DG1136N_A14244	15	76897001	102461000	25564	-0.505464	2	HETD
DG1136a_A14248_DG1136N_A14244	15	102461001	102532000	71	-0.091986	3	NEUT
DG1136a_A14248_DG1136N_A14244	16	1	14989000	14989	0.094177	3	NEUT
DG1136a_A14248_DG1136N_A14244	16	14989001	15014000	25	0.396263	4	GAIN
DG1136a_A14248_DG1136N_A14244	16	15014001	15040000	26	0.15709	3	NEUT
DG1136a_A14248_DG1136N_A14244	16	15040001	15124000	84	0.372413	4	GAIN
DG1136a_A14248_DG1136N_A14244	16	15124001	16448000	1324	0.106535	3	NEUT
DG1136a_A14248_DG1136N_A14244	16	16448001	16491000	43	0.355332	4	GAIN
DG1136a_A14248_DG1136N_A14244	16	16491001	18348000	1857	0.062916	3	NEUT
DG1136a_A14248_DG1136N_A14244	16	18348001	18374000	26	0.368277	4	GAIN
DG1136a_A14248_DG1136N_A14244	16	18374001	18396000	22	0.170348	3	NEUT
DG1136a_A14248_DG1136N_A14244	16	18396001	18504000	108	0.321803	4	GAIN
DG1136a_A14248_DG1136N_A14244	16	18504001	19773000	1269	0.091573	3	NEUT
DG1136a_A14248_DG1136N_A14244	16	19773001	19909000	136	-0.495393	2	HETD
DG1136a_A14248_DG1136N_A14244	16	19909001	23249000	3340	0.092037	3	NEUT
DG1136a_A14248_DG1136N_A14244	16	23249001	23316000	67	0.818914	5	AMP
DG1136a_A14248_DG1136N_A14244	16	23316001	25839000	2523	0.492039	4	GAIN
DG1136a_A14248_DG1136N_A14244	16	25839001	34023000	8184	0.091791	3	NEUT
DG1136a_A14248_DG1136N_A14244	16	34023001	78372000	44349	-0.512111	2	HETD
DG1136a_A14248_DG1136N_A14244	16	78372001	78384000	12	-0.020893	3	NEUT
DG1136a_A14248_DG1136N_A14244	16	78384001	90185000	11801	-0.492177	2	HETD
DG1136a_A14248_DG1136N_A14244	16	90185001	90209000	24	-0.129507	3	NEUT
DG1136a_A14248_DG1136N_A14244	16	90209001	90285000	76	-0.45469	2	HETD
DG1136a_A14248_DG1136N_A14244	16	90285001	90355000	70	-0.135786	3	NEUT
DG1136a_A14248_DG1136N_A14244	17	1	3630000	3630	0.118585	3	NEUT
DG1136a_A14248_DG1136N_A14244	17	3630001	18732000	15102	-0.498006	2	HETD
DG1136a_A14248_DG1136N_A14244	17	18732001	18745000	13	-1.04768	1	HOMD
DG1136a_A14248_DG1136N_A14244	17	18745001	18929000	184	-0.456786	2	HETD
DG1136a_A14248_DG1136N_A14244	17	18929001	18967000	38	-0.104746	3	NEUT
DG1136a_A14248_DG1136N_A14244	17	18967001	19017000	50	-0.281357	2	HETD
DG1136a_A14248_DG1136N_A14244	17	19017001	19052000	35	-0.147426	3	NEUT
DG1136a_A14248_DG1136N_A14244	17	19052001	34508000	15456	-0.494733	2	HETD
DG1136a_A14248_DG1136N_A14244	17	34508001	34553000	45	-1.42627	1	HOMD
DG1136a_A14248_DG1136N_A14244	17	34553001	34592000	39	-0.465368	2	HETD
DG1136a_A14248_DG1136N_A14244	17	34592001	34653000	61	-1.50044	1	HOMD
DG1136a_A14248_DG1136N_A14244	17	34653001	39422000	4769	-0.486843	2	HETD
DG1136a_A14248_DG1136N_A14244	17	39422001	39432000	10	-1.35841	1	HOMD
DG1136a_A14248_DG1136N_A14244	17	39432001	40344000	912	-0.469953	2	HETD
DG1136a_A14248_DG1136N_A14244	17	40344001	43623000	3279	0.099244	3	NEUT
DG1136a_A14248_DG1136N_A14244	17	43623001	43635000	12	0.412761	4	GAIN
DG1136a_A14248_DG1136N_A14244	17	43635001	43651000	16	0.110489	3	NEUT
DG1136a_A14248_DG1136N_A14244	17	43651001	43660000	9	-0.499887	2	HETD
DG1136a_A14248_DG1136N_A14244	17	43660001	44168000	508	0.095193	3	NEUT
DG1136a_A14248_DG1136N_A14244	17	44168001	44293000	125	-0.287665	2	HETD
DG1136a_A14248_DG1136N_A14244	17	44293001	44370000	77	-0.19687	3	NEUT
DG1136a_A14248_DG1136N_A14244	17	44370001	44434000	64	0.382871	4	GAIN
DG1136a_A14248_DG1136N_A14244	17	44434001	44567000	133	0.635848	5	AMP
DG1136a_A14248_DG1136N_A14244	17	44567001	44784000	217	0.481158	4	GAIN
DG1136a_A14248_DG1136N_A14244	17	44784001	45771000	987	0.108594	3	NEUT
DG1136a_A14248_DG1136N_A14244	17	45771001	45834000	63	0.307055	4	GAIN
DG1136a_A14248_DG1136N_A14244	17	45834001	45851000	17	0.158368	3	NEUT
DG1136a_A14248_DG1136N_A14244	17	45851001	45871000	20	0.335956	4	GAIN
DG1136a_A14248_DG1136N_A14244	17	45871001	46012000	141	0.214544	3	NEUT
DG1136a_A14248_DG1136N_A14244	17	46012001	46139000	127	0.271381	4	GAIN
DG1136a_A14248_DG1136N_A14244	17	46139001	46196000	57	0.151809	3	NEUT
DG1136a_A14248_DG1136N_A14244	17	46196001	46208000	12	-1.62736	1	HOMD
DG1136a_A14248_DG1136N_A14244	17	46208001	46650000	442	0.143707	3	NEUT
DG1136a_A14248_DG1136N_A14244	17	46650001	46705000	55	0.298941	4	GAIN
DG1136a_A14248_DG1136N_A14244	17	46705001	58188000	11483	0.146878	3	NEUT
DG1136a_A14248_DG1136N_A14244	17	58188001	58241000	53	0.280673	4	GAIN
DG1136a_A14248_DG1136N_A14244	17	58241001	69370000	11129	0.154854	3	NEUT
DG1136a_A14248_DG1136N_A14244	17	69370001	69412000	42	0.529949	4	GAIN
DG1136a_A14248_DG1136N_A14244	17	69412001	71149000	1737	-0.513053	2	HETD
DG1136a_A14248_DG1136N_A14244	17	71149001	74722000	3573	0.115152	3	NEUT
DG1136a_A14248_DG1136N_A14244	17	74722001	74747000	25	-0.531778	2	HETD
DG1136a_A14248_DG1136N_A14244	17	74747001	81196000	6449	0.124249	3	NEUT
DG1136a_A14248_DG1136N_A14244	18	1	42000	42	-0.315364	2	HETD
DG1136a_A14248_DG1136N_A14244	18	42001	78078000	78036	0.046042	3	NEUT
DG1136a_A14248_DG1136N_A14244	20	1	30077000	30077	0.061276	3	NEUT
DG1136a_A14248_DG1136N_A14244	20	30077001	30323000	246	0.575621	5	AMP
DG1136a_A14248_DG1136N_A14244	20	30323001	31145000	822	0.543688	4	GAIN
DG1136a_A14248_DG1136N_A14244	20	31145001	31288000	143	0.606551	5	AMP
DG1136a_A14248_DG1136N_A14244	20	31288001	35334000	4046	0.5254	4	GAIN
DG1136a_A14248_DG1136N_A14244	20	35334001	35487000	153	0.614188	5	AMP
DG1136a_A14248_DG1136N_A14244	20	35487001	36715000	1228	0.511665	4	GAIN
DG1136a_A14248_DG1136N_A14244	20	36715001	36935000	220	0.603606	5	AMP
DG1136a_A14248_DG1136N_A14244	20	36935001	37039000	104	0.526668	4	GAIN
DG1136a_A14248_DG1136N_A14244	20	37039001	37120000	81	0.615613	5	AMP
DG1136a_A14248_DG1136N_A14244	20	37120001	47734000	10614	0.502983	4	GAIN
DG1136a_A14248_DG1136N_A14244	20	47734001	54506000	6772	0.081024	3	NEUT
DG1136a_A14248_DG1136N_A14244	20	54506001	54517000	11	-1.42462	1	HOMD
DG1136a_A14248_DG1136N_A14244	20	54517001	63026000	8509	0.098316	3	NEUT
DG1136a_A14248_DG1136N_A14244	Y	1	59374000	59374	NA	3	NEUT
DG1136a_A14248_DG1136N_A14244	19	1	203000	203	-0.065713	3	NEUT
DG1136a_A14248_DG1136N_A14244	19	203001	5330000	5127	-0.441755	2	HETD
DG1136a_A14248_DG1136N_A14244	19	5330001	27740000	22410	0.111968	3	NEUT
DG1136a_A14248_DG1136N_A14244	19	27740001	27841000	101	0.444961	4	GAIN
DG1136a_A14248_DG1136N_A14244	19	27841001	27891000	50	0.181101	3	NEUT
DG1136a_A14248_DG1136N_A14244	19	27891001	28519000	628	0.490757	4	GAIN
DG1136a_A14248_DG1136N_A14244	19	28519001	30443000	1924	0.841361	5	AMP
DG1136a_A14248_DG1136N_A14244	19	30443001	30644000	201	0.522568	4	GAIN
DG1136a_A14248_DG1136N_A14244	19	30644001	33571000	2927	0.067064	3	NEUT
DG1136a_A14248_DG1136N_A14244	19	33571001	42121000	8550	-0.484216	2	HETD
DG1136a_A14248_DG1136N_A14244	19	42121001	42132000	11	-1.61016	1	HOMD
DG1136a_A14248_DG1136N_A14244	19	42132001	42525000	393	-0.482253	2	HETD
DG1136a_A14248_DG1136N_A14244	19	42525001	42542000	17	-1.3974	1	HOMD
DG1136a_A14248_DG1136N_A14244	19	42542001	52133000	9591	-0.470841	2	HETD
DG1136a_A14248_DG1136N_A14244	19	52133001	52150000	17	0.043309	3	NEUT
DG1136a_A14248_DG1136N_A14244	19	52150001	55257000	3107	-0.502321	2	HETD
DG1136a_A14248_DG1136N_A14244	19	55257001	55293000	36	-0.757071	1	HOMD
DG1136a_A14248_DG1136N_A14244	19	55293001	55328000	35	-0.42772	2	HETD
DG1136a_A14248_DG1136N_A14244	19	55328001	55363000	35	0.023596	3	NEUT
DG1136a_A14248_DG1136N_A14244	19	55363001	59129000	3766	-0.487218	2	HETD
DG1136a_A14248_DG1136N_A14244	22	1	16523000	16523	-0.069461	3	NEUT
DG1136a_A14248_DG1136N_A14244	22	16523001	24274000	7751	-0.471885	2	HETD
DG1136a_A14248_DG1136N_A14244	22	24274001	24334000	60	-0.74644	1	HOMD
DG1136a_A14248_DG1136N_A14244	22	24334001	24345000	11	-0.4292	2	HETD
DG1136a_A14248_DG1136N_A14244	22	24345001	24399000	54	0.170353	3	NEUT
DG1136a_A14248_DG1136N_A14244	22	24399001	51235000	26836	-0.49229	2	HETD
DG1136a_A14248_DG1136N_A14244	22	51235001	51305000	70	-0.064178	3	NEUT
DG1136a_A14248_DG1136N_A14244	21	1	9539000	9539	-0.255303	2	HETD
DG1136a_A14248_DG1136N_A14244	21	9539001	9707000	168	-0.136674	3	NEUT
DG1136a_A14248_DG1136N_A14244	21	9707001	9909000	202	-0.356504	2	HETD
DG1136a_A14248_DG1136N_A14244	21	9909001	10032000	123	-0.075115	3	NEUT
DG1136a_A14248_DG1136N_A14244	21	10032001	10135000	103	-0.344553	2	HETD
DG1136a_A14248_DG1136N_A14244	21	10135001	10166000	31	-0.167794	3	NEUT
DG1136a_A14248_DG1136N_A14244	21	10166001	10206000	40	-0.314869	2	HETD
DG1136a_A14248_DG1136N_A14244	21	10206001	10774000	568	-0.114431	3	NEUT
DG1136a_A14248_DG1136N_A14244	21	10774001	10861000	87	-0.266128	2	HETD
DG1136a_A14248_DG1136N_A14244	21	10861001	11055000	194	-0.177392	3	NEUT
DG1136a_A14248_DG1136N_A14244	21	11055001	11097000	42	-0.285006	2	HETD
DG1136a_A14248_DG1136N_A14244	21	11097001	11141000	44	-0.113144	3	NEUT
DG1136a_A14248_DG1136N_A14244	21	11141001	14339000	3198	-0.296551	2	HETD
DG1136a_A14248_DG1136N_A14244	21	14339001	42089000	27750	0.055813	3	NEUT
DG1136a_A14248_DG1136N_A14244	21	42089001	48103000	6014	-0.483159	2	HETD
DG1136a_A14248_DG1136N_A14244	21	48103001	48130000	27	-0.131789	3	NEUT
DG1136a_A14248_DG1136N_A14244	MT	1	17000	17	2.41296	5	AMP
DG1136c_A14221_DG1136N_A14244	1	1	364000	364	-0.098919	3	NEUT
DG1136c_A14221_DG1136N_A14244	1	364001	447000	83	-0.201735	2	HETD
DG1136c_A14221_DG1136N_A14244	1	447001	2581000	2134	0.060213	3	NEUT
DG1136c_A14221_DG1136N_A14244	1	2581001	2695000	114	0.277561	4	GAIN
DG1136c_A14221_DG1136N_A14244	1	2695001	91374000	88679	0.044035	3	NEUT
DG1136c_A14221_DG1136N_A14244	1	91374001	91450000	76	-0.305081	2	HETD
DG1136c_A14221_DG1136N_A14244	1	91450001	142786000	51336	0.032694	3	NEUT
DG1136c_A14221_DG1136N_A14244	1	142786001	142880000	94	-0.201329	2	HETD
DG1136c_A14221_DG1136N_A14244	1	142880001	143385000	505	-0.090068	3	NEUT
DG1136c_A14221_DG1136N_A14244	1	143385001	143476000	91	-0.190802	2	HETD
DG1136c_A14221_DG1136N_A14244	1	143476001	144157000	681	0.018837	3	NEUT
DG1136c_A14221_DG1136N_A14244	1	144157001	144275000	118	0.202946	4	GAIN
DG1136c_A14221_DG1136N_A14244	1	144275001	145309000	1034	0.069002	3	NEUT
DG1136c_A14221_DG1136N_A14244	1	145309001	145359000	50	0.257612	4	GAIN
DG1136c_A14221_DG1136N_A14244	1	145359001	146164000	805	0.041114	3	NEUT
DG1136c_A14221_DG1136N_A14244	1	146164001	146235000	71	0.274477	4	GAIN
DG1136c_A14221_DG1136N_A14244	1	146235001	146409000	174	-0.02636	3	NEUT
DG1136c_A14221_DG1136N_A14244	1	146409001	146466000	57	0.241516	4	GAIN
DG1136c_A14221_DG1136N_A14244	1	146466001	148251000	1785	0.061946	3	NEUT
DG1136c_A14221_DG1136N_A14244	1	148251001	148325000	74	0.201168	4	GAIN
DG1136c_A14221_DG1136N_A14244	1	148325001	214733000	66408	0.034886	3	NEUT
DG1136c_A14221_DG1136N_A14244	1	214733001	214807000	74	0.236326	4	GAIN
DG1136c_A14221_DG1136N_A14244	1	214807001	214928000	121	0.105637	3	NEUT
DG1136c_A14221_DG1136N_A14244	1	214928001	215513000	585	0.190803	4	GAIN
DG1136c_A14221_DG1136N_A14244	1	215513001	215578000	65	0.11621	3	NEUT
DG1136c_A14221_DG1136N_A14244	1	215578001	216097000	519	0.202264	4	GAIN
DG1136c_A14221_DG1136N_A14244	1	216097001	216264000	167	0.125811	3	NEUT
DG1136c_A14221_DG1136N_A14244	1	216264001	216347000	83	0.23547	4	GAIN
DG1136c_A14221_DG1136N_A14244	1	216347001	216776000	429	0.14588	3	NEUT
DG1136c_A14221_DG1136N_A14244	1	216776001	216834000	58	0.215347	4	GAIN
DG1136c_A14221_DG1136N_A14244	1	216834001	217093000	259	0.115742	3	NEUT
DG1136c_A14221_DG1136N_A14244	1	217093001	217256000	163	0.21295	4	GAIN
DG1136c_A14221_DG1136N_A14244	1	217256001	217377000	121	0.080725	3	NEUT
DG1136c_A14221_DG1136N_A14244	1	217377001	217649000	272	0.191084	4	GAIN
DG1136c_A14221_DG1136N_A14244	1	217649001	218022000	373	0.1098	3	NEUT
DG1136c_A14221_DG1136N_A14244	1	218022001	218166000	144	0.219208	4	GAIN
DG1136c_A14221_DG1136N_A14244	1	218166001	218206000	40	0.037736	3	NEUT
DG1136c_A14221_DG1136N_A14244	1	218206001	218273000	67	0.216436	4	GAIN
DG1136c_A14221_DG1136N_A14244	1	218273001	218579000	306	0.122609	3	NEUT
DG1136c_A14221_DG1136N_A14244	1	218579001	219655000	1076	0.198376	4	GAIN
DG1136c_A14221_DG1136N_A14244	1	219655001	219725000	70	0.101902	3	NEUT
DG1136c_A14221_DG1136N_A14244	1	219725001	220074000	349	0.188699	4	GAIN
DG1136c_A14221_DG1136N_A14244	1	220074001	220193000	119	0.12204	3	NEUT
DG1136c_A14221_DG1136N_A14244	1	220193001	220348000	155	0.186289	4	GAIN
DG1136c_A14221_DG1136N_A14244	1	220348001	220400000	52	0.040057	3	NEUT
DG1136c_A14221_DG1136N_A14244	1	220400001	220791000	391	0.191749	4	GAIN
DG1136c_A14221_DG1136N_A14244	1	220791001	220862000	71	0.091957	3	NEUT
DG1136c_A14221_DG1136N_A14244	1	220862001	221438000	576	0.183572	4	GAIN
DG1136c_A14221_DG1136N_A14244	1	221438001	221496000	58	0.092178	3	NEUT
DG1136c_A14221_DG1136N_A14244	1	221496001	224276000	2780	0.193813	4	GAIN
DG1136c_A14221_DG1136N_A14244	1	224276001	224454000	178	0.131107	3	NEUT
DG1136c_A14221_DG1136N_A14244	1	224454001	225173000	719	0.204758	4	GAIN
DG1136c_A14221_DG1136N_A14244	1	225173001	225242000	69	0.116046	3	NEUT
DG1136c_A14221_DG1136N_A14244	1	225242001	225507000	265	0.215739	4	GAIN
DG1136c_A14221_DG1136N_A14244	1	225507001	225566000	59	0.11798	3	NEUT
DG1136c_A14221_DG1136N_A14244	1	225566001	225678000	112	0.21318	4	GAIN
DG1136c_A14221_DG1136N_A14244	1	225678001	225835000	157	0.122835	3	NEUT
DG1136c_A14221_DG1136N_A14244	1	225835001	226106000	271	0.215906	4	GAIN
DG1136c_A14221_DG1136N_A14244	1	226106001	226490000	384	0.132366	3	NEUT
DG1136c_A14221_DG1136N_A14244	1	226490001	227187000	697	0.202296	4	GAIN
DG1136c_A14221_DG1136N_A14244	1	227187001	227277000	90	0.112444	3	NEUT
DG1136c_A14221_DG1136N_A14244	1	227277001	227301000	24	0.311141	4	GAIN
DG1136c_A14221_DG1136N_A14244	1	227301001	227381000	80	0.082658	3	NEUT
DG1136c_A14221_DG1136N_A14244	1	227381001	228716000	1335	0.197218	4	GAIN
DG1136c_A14221_DG1136N_A14244	1	228716001	228744000	28	-0.189543	3	NEUT
DG1136c_A14221_DG1136N_A14244	1	228744001	229322000	578	0.202662	4	GAIN
DG1136c_A14221_DG1136N_A14244	1	229322001	229518000	196	0.143239	3	NEUT
DG1136c_A14221_DG1136N_A14244	1	229518001	229937000	419	0.19592	4	GAIN
DG1136c_A14221_DG1136N_A14244	1	229937001	229979000	42	0.068087	3	NEUT
DG1136c_A14221_DG1136N_A14244	1	229979001	231547000	1568	0.200179	4	GAIN
DG1136c_A14221_DG1136N_A14244	1	231547001	231615000	68	0.082123	3	NEUT
DG1136c_A14221_DG1136N_A14244	1	231615001	233635000	2020	0.197373	4	GAIN
DG1136c_A14221_DG1136N_A14244	1	233635001	233788000	153	0.10498	3	NEUT
DG1136c_A14221_DG1136N_A14244	1	233788001	234451000	663	0.196766	4	GAIN
DG1136c_A14221_DG1136N_A14244	1	234451001	234602000	151	0.134031	3	NEUT
DG1136c_A14221_DG1136N_A14244	1	234602001	235169000	567	0.215891	4	GAIN
DG1136c_A14221_DG1136N_A14244	1	235169001	235251000	82	0.063884	3	NEUT
DG1136c_A14221_DG1136N_A14244	1	235251001	235323000	72	0.262526	4	GAIN
DG1136c_A14221_DG1136N_A14244	1	235323001	235573000	250	0.130205	3	NEUT
DG1136c_A14221_DG1136N_A14244	1	235573001	235815000	242	0.225366	4	GAIN
DG1136c_A14221_DG1136N_A14244	1	235815001	236009000	194	0.141218	3	NEUT
DG1136c_A14221_DG1136N_A14244	1	236009001	236432000	423	0.216357	4	GAIN
DG1136c_A14221_DG1136N_A14244	1	236432001	236886000	454	0.141106	3	NEUT
DG1136c_A14221_DG1136N_A14244	1	236886001	237588000	702	0.181106	4	GAIN
DG1136c_A14221_DG1136N_A14244	1	237588001	237632000	44	0.083786	3	NEUT
DG1136c_A14221_DG1136N_A14244	1	237632001	237684000	52	0.228322	4	GAIN
DG1136c_A14221_DG1136N_A14244	1	237684001	238026000	342	0.146408	3	NEUT
DG1136c_A14221_DG1136N_A14244	1	238026001	238059000	33	0.257828	4	GAIN
DG1136c_A14221_DG1136N_A14244	1	238059001	238269000	210	0.148694	3	NEUT
DG1136c_A14221_DG1136N_A14244	1	238269001	238433000	164	0.195001	4	GAIN
DG1136c_A14221_DG1136N_A14244	1	238433001	241469000	3036	0.132165	3	NEUT
DG1136c_A14221_DG1136N_A14244	1	241469001	241865000	396	0.189088	4	GAIN
DG1136c_A14221_DG1136N_A14244	1	241865001	242260000	395	0.132174	3	NEUT
DG1136c_A14221_DG1136N_A14244	1	242260001	243287000	1027	0.180297	4	GAIN
DG1136c_A14221_DG1136N_A14244	1	243287001	243522000	235	0.122884	3	NEUT
DG1136c_A14221_DG1136N_A14244	1	243522001	243993000	471	0.188073	4	GAIN
DG1136c_A14221_DG1136N_A14244	1	243993001	244060000	67	0.08521	3	NEUT
DG1136c_A14221_DG1136N_A14244	1	244060001	244187000	127	0.214668	4	GAIN
DG1136c_A14221_DG1136N_A14244	1	244187001	244269000	82	0.115591	3	NEUT
DG1136c_A14221_DG1136N_A14244	1	244269001	244608000	339	0.189254	4	GAIN
DG1136c_A14221_DG1136N_A14244	1	244608001	244703000	95	0.12088	3	NEUT
DG1136c_A14221_DG1136N_A14244	1	244703001	245165000	462	0.188405	4	GAIN
DG1136c_A14221_DG1136N_A14244	1	245165001	245293000	128	0.133041	3	NEUT
DG1136c_A14221_DG1136N_A14244	1	245293001	246292000	999	0.199152	4	GAIN
DG1136c_A14221_DG1136N_A14244	1	246292001	246639000	347	0.151171	3	NEUT
DG1136c_A14221_DG1136N_A14244	1	246639001	246803000	164	0.207468	4	GAIN
DG1136c_A14221_DG1136N_A14244	1	246803001	246931000	128	0.116652	3	NEUT
DG1136c_A14221_DG1136N_A14244	1	246931001	248746000	1815	0.194965	4	GAIN
DG1136c_A14221_DG1136N_A14244	1	248746001	248903000	157	0.095796	3	NEUT
DG1136c_A14221_DG1136N_A14244	1	248903001	249155000	252	0.218435	4	GAIN
DG1136c_A14221_DG1136N_A14244	1	249155001	249251000	96	0.150157	3	NEUT
DG1136c_A14221_DG1136N_A14244	2	1	87633000	87633	0.032026	3	NEUT
DG1136c_A14221_DG1136N_A14244	2	87633001	87732000	99	0.264665	4	GAIN
DG1136c_A14221_DG1136N_A14244	2	87732001	89630000	1898	0.053665	3	NEUT
DG1136c_A14221_DG1136N_A14244	2	89630001	89880000	250	0.239758	4	GAIN
DG1136c_A14221_DG1136N_A14244	2	89880001	96544000	6664	0.050122	3	NEUT
DG1136c_A14221_DG1136N_A14244	2	96544001	96596000	52	0.316201	4	GAIN
DG1136c_A14221_DG1136N_A14244	2	96596001	97841000	1245	0.063016	3	NEUT
DG1136c_A14221_DG1136N_A14244	2	97841001	97885000	44	0.284573	4	GAIN
DG1136c_A14221_DG1136N_A14244	2	97885001	98151000	266	0.073743	3	NEUT
DG1136c_A14221_DG1136N_A14244	2	98151001	98178000	27	0.301776	4	GAIN
DG1136c_A14221_DG1136N_A14244	2	98178001	232688000	134510	0.031744	3	NEUT
DG1136c_A14221_DG1136N_A14244	2	232688001	232715000	27	-0.421548	2	HETD
DG1136c_A14221_DG1136N_A14244	2	232715001	243200000	10485	0.063937	3	NEUT
DG1136c_A14221_DG1136N_A14244	3	1	61058000	61058	-0.281534	2	HETD
DG1136c_A14221_DG1136N_A14244	3	61058001	61719000	661	0.33372	4	GAIN
DG1136c_A14221_DG1136N_A14244	3	61719001	115990000	54271	0.029202	3	NEUT
DG1136c_A14221_DG1136N_A14244	3	115990001	116169000	179	-0.295912	2	HETD
DG1136c_A14221_DG1136N_A14244	3	116169001	116273000	104	0.038808	3	NEUT
DG1136c_A14221_DG1136N_A14244	3	116273001	116368000	95	-0.305856	2	HETD
DG1136c_A14221_DG1136N_A14244	3	116368001	117372000	1004	0.016353	3	NEUT
DG1136c_A14221_DG1136N_A14244	3	117372001	117499000	127	-0.315373	2	HETD
DG1136c_A14221_DG1136N_A14244	3	117499001	167578000	50079	0.038806	3	NEUT
DG1136c_A14221_DG1136N_A14244	3	167578001	189825000	22247	0.316673	4	GAIN
DG1136c_A14221_DG1136N_A14244	3	189825001	195476000	5651	0.047961	3	NEUT
DG1136c_A14221_DG1136N_A14244	3	195476001	195520000	44	0.290375	4	GAIN
DG1136c_A14221_DG1136N_A14244	3	195520001	198023000	2503	0.037194	3	NEUT
DG1136c_A14221_DG1136N_A14244	4	1	21837000	21837	0.045559	3	NEUT
DG1136c_A14221_DG1136N_A14244	4	21837001	22117000	280	-0.287638	2	HETD
DG1136c_A14221_DG1136N_A14244	4	22117001	130388000	108271	0.020072	3	NEUT
DG1136c_A14221_DG1136N_A14244	4	130388001	147886000	17498	-0.308887	2	HETD
DG1136c_A14221_DG1136N_A14244	4	147886001	151278000	3392	0.094021	3	NEUT
DG1136c_A14221_DG1136N_A14244	4	151278001	151665000	387	-0.288687	2	HETD
DG1136c_A14221_DG1136N_A14244	4	151665001	191155000	39490	0.072891	3	NEUT
DG1136c_A14221_DG1136N_A14244	5	1	22511000	22511	0.027402	3	NEUT
DG1136c_A14221_DG1136N_A14244	5	22511001	25538000	3027	0.244635	4	GAIN
DG1136c_A14221_DG1136N_A14244	5	25538001	25566000	28	-0.020159	3	NEUT
DG1136c_A14221_DG1136N_A14244	5	25566001	40582000	15016	0.291825	4	GAIN
DG1136c_A14221_DG1136N_A14244	5	40582001	59187000	18605	0.025518	3	NEUT
DG1136c_A14221_DG1136N_A14244	5	59187001	59253000	66	-0.269071	2	HETD
DG1136c_A14221_DG1136N_A14244	5	59253001	142046000	82793	0.032364	3	NEUT
DG1136c_A14221_DG1136N_A14244	5	142046001	142121000	75	0.358942	4	GAIN
DG1136c_A14221_DG1136N_A14244	5	142121001	178977000	36856	0.041929	3	NEUT
DG1136c_A14221_DG1136N_A14244	5	178977001	180733000	1756	-0.275958	2	HETD
DG1136c_A14221_DG1136N_A14244	5	180733001	180794000	61	-0.04719	3	NEUT
DG1136c_A14221_DG1136N_A14244	5	180794001	180866000	72	-0.249126	2	HETD
DG1136c_A14221_DG1136N_A14244	5	180866001	180916000	50	-0.087135	3	NEUT
DG1136c_A14221_DG1136N_A14244	6	1	34423000	34423	0.052181	3	NEUT
DG1136c_A14221_DG1136N_A14244	6	34423001	34465000	42	0.273782	4	GAIN
DG1136c_A14221_DG1136N_A14244	6	34465001	34602000	137	0.5974	5	AMP
DG1136c_A14221_DG1136N_A14244	6	34602001	34640000	38	0.298219	4	GAIN
DG1136c_A14221_DG1136N_A14244	6	34640001	57824000	23184	0.031132	3	NEUT
DG1136c_A14221_DG1136N_A14244	6	57824001	58139000	315	0.306753	4	GAIN
DG1136c_A14221_DG1136N_A14244	6	58139001	61919000	3780	0.033714	3	NEUT
DG1136c_A14221_DG1136N_A14244	6	61919001	135123000	73204	0.281436	4	GAIN
DG1136c_A14221_DG1136N_A14244	6	135123001	170935000	35812	-0.288431	2	HETD
DG1136c_A14221_DG1136N_A14244	6	170935001	170993000	58	0.002142	3	NEUT
DG1136c_A14221_DG1136N_A14244	6	170993001	171116000	123	-0.233368	2	HETD
DG1136c_A14221_DG1136N_A14244	7	1	77000	77	-0.079896	3	NEUT
DG1136c_A14221_DG1136N_A14244	7	77001	6194000	6117	-0.284635	2	HETD
DG1136c_A14221_DG1136N_A14244	7	6194001	38292000	32098	0.029779	3	NEUT
DG1136c_A14221_DG1136N_A14244	7	38292001	38398000	106	0.258285	4	GAIN
DG1136c_A14221_DG1136N_A14244	7	38398001	57940000	19542	0.033452	3	NEUT
DG1136c_A14221_DG1136N_A14244	7	57940001	58053000	113	-0.211883	2	HETD
DG1136c_A14221_DG1136N_A14244	7	58053001	62017000	3964	-0.072854	3	NEUT
DG1136c_A14221_DG1136N_A14244	7	62017001	62048000	31	-0.220315	2	HETD
DG1136c_A14221_DG1136N_A14244	7	62048001	142332000	80284	0.029233	3	NEUT
DG1136c_A14221_DG1136N_A14244	7	142332001	142492000	160	0.280515	4	GAIN
DG1136c_A14221_DG1136N_A14244	7	142492001	159139000	16647	0.049328	3	NEUT
DG1136c_A14221_DG1136N_A14244	X	1	39325000	39325	0.29578	4	GAIN
DG1136c_A14221_DG1136N_A14244	X	39325001	44778000	5453	0.017075	3	NEUT
DG1136c_A14221_DG1136N_A14244	X	44778001	44889000	111	-0.373027	2	HETD
DG1136c_A14221_DG1136N_A14244	X	44889001	58210000	13321	0.04549	3	NEUT
DG1136c_A14221_DG1136N_A14244	X	58210001	58281000	71	-0.249117	2	HETD
DG1136c_A14221_DG1136N_A14244	X	58281001	61785000	3504	-0.006934	3	NEUT
DG1136c_A14221_DG1136N_A14244	X	61785001	61917000	132	-0.171566	2	HETD
DG1136c_A14221_DG1136N_A14244	X	61917001	155271000	93354	0.024722	3	NEUT
DG1136c_A14221_DG1136N_A14244	8	1	67000	67	-0.044606	3	NEUT
DG1136c_A14221_DG1136N_A14244	8	67001	96000	29	-0.258929	2	HETD
DG1136c_A14221_DG1136N_A14244	8	96001	155000	59	-0.007886	3	NEUT
DG1136c_A14221_DG1136N_A14244	8	155001	6829000	6674	-0.295914	2	HETD
DG1136c_A14221_DG1136N_A14244	8	6829001	6878000	49	-0.053996	3	NEUT
DG1136c_A14221_DG1136N_A14244	8	6878001	7017000	139	-0.26311	2	HETD
DG1136c_A14221_DG1136N_A14244	8	7017001	7043000	26	-0.01567	3	NEUT
DG1136c_A14221_DG1136N_A14244	8	7043001	7118000	75	-0.255277	2	HETD
DG1136c_A14221_DG1136N_A14244	8	7118001	7152000	34	-0.005444	3	NEUT
DG1136c_A14221_DG1136N_A14244	8	7152001	7229000	77	-0.314794	2	HETD
DG1136c_A14221_DG1136N_A14244	8	7229001	7461000	232	-0.083866	3	NEUT
DG1136c_A14221_DG1136N_A14244	8	7461001	7570000	109	-0.220366	2	HETD
DG1136c_A14221_DG1136N_A14244	8	7570001	7862000	292	-0.048925	3	NEUT
DG1136c_A14221_DG1136N_A14244	8	7862001	11951000	4089	-0.284861	2	HETD
DG1136c_A14221_DG1136N_A14244	8	11951001	11976000	25	0.097594	3	NEUT
DG1136c_A14221_DG1136N_A14244	8	11976001	12028000	52	-0.236005	2	HETD
DG1136c_A14221_DG1136N_A14244	8	12028001	12087000	59	-0.078758	3	NEUT
DG1136c_A14221_DG1136N_A14244	8	12087001	12203000	116	-0.266672	2	HETD
DG1136c_A14221_DG1136N_A14244	8	12203001	12333000	130	0.011254	3	NEUT
DG1136c_A14221_DG1136N_A14244	8	12333001	37716000	25383	-0.299864	2	HETD
DG1136c_A14221_DG1136N_A14244	8	37716001	90028000	52312	0.0224	3	NEUT
DG1136c_A14221_DG1136N_A14244	8	90028001	90081000	53	-0.282823	2	HETD
DG1136c_A14221_DG1136N_A14244	8	90081001	97044000	6963	0.021309	3	NEUT
DG1136c_A14221_DG1136N_A14244	8	97044001	113676000	16632	0.525103	5	AMP
DG1136c_A14221_DG1136N_A14244	8	113676001	113733000	57	0.352144	4	GAIN
DG1136c_A14221_DG1136N_A14244	8	113733001	146365000	32632	0.545421	5	AMP
DG1136c_A14221_DG1136N_A14244	9	1	66973000	66973	0.022663	3	NEUT
DG1136c_A14221_DG1136N_A14244	9	66973001	67004000	31	-0.261106	2	HETD
DG1136c_A14221_DG1136N_A14244	9	67004001	69690000	2686	0.007556	3	NEUT
DG1136c_A14221_DG1136N_A14244	9	69690001	69708000	18	-0.311216	2	HETD
DG1136c_A14221_DG1136N_A14244	9	69708001	69935000	227	-0.014373	3	NEUT
DG1136c_A14221_DG1136N_A14244	9	69935001	69987000	52	-0.246851	2	HETD
DG1136c_A14221_DG1136N_A14244	9	69987001	131510000	61523	0.027496	3	NEUT
DG1136c_A14221_DG1136N_A14244	9	131510001	131619000	109	0.329426	4	GAIN
DG1136c_A14221_DG1136N_A14244	9	131619001	141214000	9595	0.040271	3	NEUT
DG1136c_A14221_DG1136N_A14244	10	1	7123000	7123	0.234499	4	GAIN
DG1136c_A14221_DG1136N_A14244	10	7123001	7869000	746	0.461671	5	AMP
DG1136c_A14221_DG1136N_A14244	10	7869001	8214000	345	0.389067	4	GAIN
DG1136c_A14221_DG1136N_A14244	10	8214001	8534000	320	0.463496	5	AMP
DG1136c_A14221_DG1136N_A14244	10	8534001	9018000	484	0.416911	4	GAIN
DG1136c_A14221_DG1136N_A14244	10	9018001	9444000	426	0.440327	5	AMP
DG1136c_A14221_DG1136N_A14244	10	9444001	9936000	492	0.404602	4	GAIN
DG1136c_A14221_DG1136N_A14244	10	9936001	11982000	2046	0.480407	5	AMP
DG1136c_A14221_DG1136N_A14244	10	11982001	12139000	157	0.392404	4	GAIN
DG1136c_A14221_DG1136N_A14244	10	12139001	16672000	4533	0.471728	5	AMP
DG1136c_A14221_DG1136N_A14244	10	16672001	16787000	115	0.376835	4	GAIN
DG1136c_A14221_DG1136N_A14244	10	16787001	17283000	496	0.438579	5	AMP
DG1136c_A14221_DG1136N_A14244	10	17283001	17727000	444	0.413146	4	GAIN
DG1136c_A14221_DG1136N_A14244	10	17727001	18524000	797	0.452117	5	AMP
DG1136c_A14221_DG1136N_A14244	10	18524001	18842000	318	0.410608	4	GAIN
DG1136c_A14221_DG1136N_A14244	10	18842001	18866000	24	0.689948	5	AMP
DG1136c_A14221_DG1136N_A14244	10	18866001	19192000	326	0.409275	4	GAIN
DG1136c_A14221_DG1136N_A14244	10	19192001	19270000	78	0.494297	5	AMP
DG1136c_A14221_DG1136N_A14244	10	19270001	20575000	1305	0.404498	4	GAIN
DG1136c_A14221_DG1136N_A14244	10	20575001	21725000	1150	0.453381	5	AMP
DG1136c_A14221_DG1136N_A14244	10	21725001	22005000	280	0.409672	4	GAIN
DG1136c_A14221_DG1136N_A14244	10	22005001	33120000	11115	0.46675	5	AMP
DG1136c_A14221_DG1136N_A14244	10	33120001	34655000	1535	0.256335	4	GAIN
DG1136c_A14221_DG1136N_A14244	10	34655001	38775000	4120	0.013091	3	NEUT
DG1136c_A14221_DG1136N_A14244	10	38775001	38898000	123	0.215242	4	GAIN
DG1136c_A14221_DG1136N_A14244	10	38898001	42661000	3763	0.030332	3	NEUT
DG1136c_A14221_DG1136N_A14244	10	42661001	44307000	1646	0.230388	4	GAIN
DG1136c_A14221_DG1136N_A14244	10	44307001	46131000	1824	-0.001319	3	NEUT
DG1136c_A14221_DG1136N_A14244	10	46131001	46483000	352	-0.301567	2	HETD
DG1136c_A14221_DG1136N_A14244	10	46483001	46784000	301	-0.049079	3	NEUT
DG1136c_A14221_DG1136N_A14244	10	46784001	46877000	93	-0.206231	2	HETD
DG1136c_A14221_DG1136N_A14244	10	46877001	47166000	289	-0.098853	3	NEUT
DG1136c_A14221_DG1136N_A14244	10	47166001	47580000	414	-0.279732	2	HETD
DG1136c_A14221_DG1136N_A14244	10	47580001	47895000	315	0.01387	3	NEUT
DG1136c_A14221_DG1136N_A14244	10	47895001	48277000	382	-0.243206	2	HETD
DG1136c_A14221_DG1136N_A14244	10	48277001	49017000	740	-0.020814	3	NEUT
DG1136c_A14221_DG1136N_A14244	10	49017001	54278000	5261	-0.295743	2	HETD
DG1136c_A14221_DG1136N_A14244	10	54278001	77728000	23450	0.030489	3	NEUT
DG1136c_A14221_DG1136N_A14244	10	77728001	79710000	1982	0.327021	4	GAIN
DG1136c_A14221_DG1136N_A14244	10	79710001	84194000	4484	0.055773	3	NEUT
DG1136c_A14221_DG1136N_A14244	10	84194001	101648000	17454	-0.292848	2	HETD
DG1136c_A14221_DG1136N_A14244	10	101648001	105073000	3425	0.050055	3	NEUT
DG1136c_A14221_DG1136N_A14244	10	105073001	133865000	28792	-0.296143	2	HETD
DG1136c_A14221_DG1136N_A14244	10	133865001	135535000	1670	0.100362	3	NEUT
DG1136c_A14221_DG1136N_A14244	11	1	106000	106	-0.009099	3	NEUT
DG1136c_A14221_DG1136N_A14244	11	106001	964000	858	-0.243892	2	HETD
DG1136c_A14221_DG1136N_A14244	11	964001	1096000	132	0.075136	3	NEUT
DG1136c_A14221_DG1136N_A14244	11	1096001	9793000	8697	-0.275883	2	HETD
DG1136c_A14221_DG1136N_A14244	11	9793001	50716000	40923	0.031973	3	NEUT
DG1136c_A14221_DG1136N_A14244	11	50716001	50760000	44	-0.235804	2	HETD
DG1136c_A14221_DG1136N_A14244	11	50760001	54907000	4147	0.046884	3	NEUT
DG1136c_A14221_DG1136N_A14244	11	54907001	54989000	82	-0.22244	2	HETD
DG1136c_A14221_DG1136N_A14244	11	54989001	58837000	3848	0.040176	3	NEUT
DG1136c_A14221_DG1136N_A14244	11	58837001	58876000	39	-0.241595	2	HETD
DG1136c_A14221_DG1136N_A14244	11	58876001	59663000	787	0.049189	3	NEUT
DG1136c_A14221_DG1136N_A14244	11	59663001	63384000	3721	0.211889	4	GAIN
DG1136c_A14221_DG1136N_A14244	11	63384001	63563000	179	0.112656	3	NEUT
DG1136c_A14221_DG1136N_A14244	11	63563001	72147000	8584	0.204521	4	GAIN
DG1136c_A14221_DG1136N_A14244	11	72147001	72218000	71	0.124217	3	NEUT
DG1136c_A14221_DG1136N_A14244	11	72218001	73146000	928	0.216937	4	GAIN
DG1136c_A14221_DG1136N_A14244	11	73146001	73273000	127	0.13107	3	NEUT
DG1136c_A14221_DG1136N_A14244	11	73273001	78146000	4873	0.196507	4	GAIN
DG1136c_A14221_DG1136N_A14244	11	78146001	78221000	75	0.09278	3	NEUT
DG1136c_A14221_DG1136N_A14244	11	78221001	79596000	1375	0.20828	4	GAIN
DG1136c_A14221_DG1136N_A14244	11	79596001	79647000	51	0.09316	3	NEUT
DG1136c_A14221_DG1136N_A14244	11	79647001	79903000	256	0.206523	4	GAIN
DG1136c_A14221_DG1136N_A14244	11	79903001	80375000	472	0.141672	3	NEUT
DG1136c_A14221_DG1136N_A14244	11	80375001	80911000	536	0.187293	4	GAIN
DG1136c_A14221_DG1136N_A14244	11	80911001	81756000	845	0.136976	3	NEUT
DG1136c_A14221_DG1136N_A14244	11	81756001	83737000	1981	0.190018	4	GAIN
DG1136c_A14221_DG1136N_A14244	11	83737001	83774000	37	0.080657	3	NEUT
DG1136c_A14221_DG1136N_A14244	11	83774001	83821000	47	0.256751	4	GAIN
DG1136c_A14221_DG1136N_A14244	11	83821001	84014000	193	0.139309	3	NEUT
DG1136c_A14221_DG1136N_A14244	11	84014001	84087000	73	0.190159	4	GAIN
DG1136c_A14221_DG1136N_A14244	11	84087001	84394000	307	0.13585	3	NEUT
DG1136c_A14221_DG1136N_A14244	11	84394001	84449000	55	0.231403	4	GAIN
DG1136c_A14221_DG1136N_A14244	11	84449001	84698000	249	0.130432	3	NEUT
DG1136c_A14221_DG1136N_A14244	11	84698001	84881000	183	0.215928	4	GAIN
DG1136c_A14221_DG1136N_A14244	11	84881001	84968000	87	0.103918	3	NEUT
DG1136c_A14221_DG1136N_A14244	11	84968001	85575000	607	0.19273	4	GAIN
DG1136c_A14221_DG1136N_A14244	11	85575001	85621000	46	0.088692	3	NEUT
DG1136c_A14221_DG1136N_A14244	11	85621001	85692000	71	0.255246	4	GAIN
DG1136c_A14221_DG1136N_A14244	11	85692001	85757000	65	0.097304	3	NEUT
DG1136c_A14221_DG1136N_A14244	11	85757001	86883000	1126	0.199903	4	GAIN
DG1136c_A14221_DG1136N_A14244	11	86883001	87038000	155	0.141008	3	NEUT
DG1136c_A14221_DG1136N_A14244	11	87038001	89212000	2174	0.199976	4	GAIN
DG1136c_A14221_DG1136N_A14244	11	89212001	89283000	71	0.094998	3	NEUT
DG1136c_A14221_DG1136N_A14244	11	89283001	89372000	89	0.207392	4	GAIN
DG1136c_A14221_DG1136N_A14244	11	89372001	89463000	91	0.109689	3	NEUT
DG1136c_A14221_DG1136N_A14244	11	89463001	89850000	387	0.207596	4	GAIN
DG1136c_A14221_DG1136N_A14244	11	89850001	89994000	144	0.095635	3	NEUT
DG1136c_A14221_DG1136N_A14244	11	89994001	90137000	143	0.204734	4	GAIN
DG1136c_A14221_DG1136N_A14244	11	90137001	90678000	541	0.14101	3	NEUT
DG1136c_A14221_DG1136N_A14244	11	90678001	90825000	147	0.191754	4	GAIN
DG1136c_A14221_DG1136N_A14244	11	90825001	91244000	419	0.13176	3	NEUT
DG1136c_A14221_DG1136N_A14244	11	91244001	91490000	246	0.168178	4	GAIN
DG1136c_A14221_DG1136N_A14244	11	91490001	91610000	120	0.125238	3	NEUT
DG1136c_A14221_DG1136N_A14244	11	91610001	91895000	285	0.189664	4	GAIN
DG1136c_A14221_DG1136N_A14244	11	91895001	91999000	104	0.100925	3	NEUT
DG1136c_A14221_DG1136N_A14244	11	91999001	92803000	804	0.186596	4	GAIN
DG1136c_A14221_DG1136N_A14244	11	92803001	92897000	94	0.11126	3	NEUT
DG1136c_A14221_DG1136N_A14244	11	92897001	93131000	234	0.188794	4	GAIN
DG1136c_A14221_DG1136N_A14244	11	93131001	93187000	56	0.068513	3	NEUT
DG1136c_A14221_DG1136N_A14244	11	93187001	94168000	981	0.190942	4	GAIN
DG1136c_A14221_DG1136N_A14244	11	94168001	94244000	76	0.101486	3	NEUT
DG1136c_A14221_DG1136N_A14244	11	94244001	95587000	1343	0.191591	4	GAIN
DG1136c_A14221_DG1136N_A14244	11	95587001	95702000	115	0.129783	3	NEUT
DG1136c_A14221_DG1136N_A14244	11	95702001	97424000	1722	0.197465	4	GAIN
DG1136c_A14221_DG1136N_A14244	11	97424001	98013000	589	0.131669	3	NEUT
DG1136c_A14221_DG1136N_A14244	11	98013001	98049000	36	0.252133	4	GAIN
DG1136c_A14221_DG1136N_A14244	11	98049001	98303000	254	0.118331	3	NEUT
DG1136c_A14221_DG1136N_A14244	11	98303001	98448000	145	0.17979	4	GAIN
DG1136c_A14221_DG1136N_A14244	11	98448001	98592000	144	0.109295	3	NEUT
DG1136c_A14221_DG1136N_A14244	11	98592001	98788000	196	0.206119	4	GAIN
DG1136c_A14221_DG1136N_A14244	11	98788001	98847000	59	0.065879	3	NEUT
DG1136c_A14221_DG1136N_A14244	11	98847001	99121000	274	0.176692	4	GAIN
DG1136c_A14221_DG1136N_A14244	11	99121001	99449000	328	0.118115	3	NEUT
DG1136c_A14221_DG1136N_A14244	11	99449001	99558000	109	0.229543	4	GAIN
DG1136c_A14221_DG1136N_A14244	11	99558001	99632000	74	0.117931	3	NEUT
DG1136c_A14221_DG1136N_A14244	11	99632001	100175000	543	0.194017	4	GAIN
DG1136c_A14221_DG1136N_A14244	11	100175001	100229000	54	0.088948	3	NEUT
DG1136c_A14221_DG1136N_A14244	11	100229001	100483000	254	0.204672	4	GAIN
DG1136c_A14221_DG1136N_A14244	11	100483001	100615000	132	0.107936	3	NEUT
DG1136c_A14221_DG1136N_A14244	11	100615001	100844000	229	0.221174	4	GAIN
DG1136c_A14221_DG1136N_A14244	11	100844001	100967000	123	0.12554	3	NEUT
DG1136c_A14221_DG1136N_A14244	11	100967001	101112000	145	0.185308	4	GAIN
DG1136c_A14221_DG1136N_A14244	11	101112001	101215000	103	0.10722	3	NEUT
DG1136c_A14221_DG1136N_A14244	11	101215001	102811000	1596	0.189189	4	GAIN
DG1136c_A14221_DG1136N_A14244	11	102811001	102849000	38	0.055388	3	NEUT
DG1136c_A14221_DG1136N_A14244	11	102849001	103010000	161	0.174498	4	GAIN
DG1136c_A14221_DG1136N_A14244	11	103010001	103235000	225	0.141377	3	NEUT
DG1136c_A14221_DG1136N_A14244	11	103235001	104401000	1166	0.177039	4	GAIN
DG1136c_A14221_DG1136N_A14244	11	104401001	104520000	119	0.124387	3	NEUT
DG1136c_A14221_DG1136N_A14244	11	104520001	104974000	454	0.190816	4	GAIN
DG1136c_A14221_DG1136N_A14244	11	104974001	105589000	615	0.132463	3	NEUT
DG1136c_A14221_DG1136N_A14244	11	105589001	106281000	692	0.18879	4	GAIN
DG1136c_A14221_DG1136N_A14244	11	106281001	106469000	188	0.134938	3	NEUT
DG1136c_A14221_DG1136N_A14244	11	106469001	107107000	638	0.19546	4	GAIN
DG1136c_A14221_DG1136N_A14244	11	107107001	107187000	80	0.1043	3	NEUT
DG1136c_A14221_DG1136N_A14244	11	107187001	107253000	66	0.234487	4	GAIN
DG1136c_A14221_DG1136N_A14244	11	107253001	107343000	90	0.121617	3	NEUT
DG1136c_A14221_DG1136N_A14244	11	107343001	107778000	435	0.191422	4	GAIN
DG1136c_A14221_DG1136N_A14244	11	107778001	107844000	66	0.086979	3	NEUT
DG1136c_A14221_DG1136N_A14244	11	107844001	107865000	21	0.299105	4	GAIN
DG1136c_A14221_DG1136N_A14244	11	107865001	107896000	31	0.044781	3	NEUT
DG1136c_A14221_DG1136N_A14244	11	107896001	113464000	5568	0.19681	4	GAIN
DG1136c_A14221_DG1136N_A14244	11	113464001	113501000	37	0.06592	3	NEUT
DG1136c_A14221_DG1136N_A14244	11	113501001	113905000	404	0.206408	4	GAIN
DG1136c_A14221_DG1136N_A14244	11	113905001	113982000	77	0.115473	3	NEUT
DG1136c_A14221_DG1136N_A14244	11	113982001	118708000	4726	0.204058	4	GAIN
DG1136c_A14221_DG1136N_A14244	11	118708001	118820000	112	0.113638	3	NEUT
DG1136c_A14221_DG1136N_A14244	11	118820001	119040000	220	0.181881	4	GAIN
DG1136c_A14221_DG1136N_A14244	11	119040001	119094000	54	0.090916	3	NEUT
DG1136c_A14221_DG1136N_A14244	11	119094001	119244000	150	0.218264	4	GAIN
DG1136c_A14221_DG1136N_A14244	11	119244001	119309000	65	0.113582	3	NEUT
DG1136c_A14221_DG1136N_A14244	11	119309001	122836000	3527	0.197396	4	GAIN
DG1136c_A14221_DG1136N_A14244	11	122836001	122860000	24	-0.015787	3	NEUT
DG1136c_A14221_DG1136N_A14244	11	122860001	122943000	83	0.219284	4	GAIN
DG1136c_A14221_DG1136N_A14244	11	122943001	128738000	5795	0.041346	3	NEUT
DG1136c_A14221_DG1136N_A14244	11	128738001	131535000	2797	0.32199	4	GAIN
DG1136c_A14221_DG1136N_A14244	11	131535001	132394000	859	0.452879	5	AMP
DG1136c_A14221_DG1136N_A14244	11	132394001	133155000	761	0.408379	4	GAIN
DG1136c_A14221_DG1136N_A14244	11	133155001	133302000	147	0.451097	5	AMP
DG1136c_A14221_DG1136N_A14244	11	133302001	133368000	66	0.337808	4	GAIN
DG1136c_A14221_DG1136N_A14244	11	133368001	133599000	231	0.475883	5	AMP
DG1136c_A14221_DG1136N_A14244	11	133599001	133680000	81	0.370464	4	GAIN
DG1136c_A14221_DG1136N_A14244	11	133680001	134043000	363	0.456965	5	AMP
DG1136c_A14221_DG1136N_A14244	11	134043001	134153000	110	0.362867	4	GAIN
DG1136c_A14221_DG1136N_A14244	11	134153001	135007000	854	0.450391	5	AMP
DG1136c_A14221_DG1136N_A14244	12	1	162000	162	0.062676	3	NEUT
DG1136c_A14221_DG1136N_A14244	12	162001	9633000	9471	-0.280224	2	HETD
DG1136c_A14221_DG1136N_A14244	12	9633001	9735000	102	0.089022	3	NEUT
DG1136c_A14221_DG1136N_A14244	12	9735001	11501000	1766	-0.286282	2	HETD
DG1136c_A14221_DG1136N_A14244	12	11501001	11550000	49	-0.059673	3	NEUT
DG1136c_A14221_DG1136N_A14244	12	11550001	23485000	11935	-0.300155	2	HETD
DG1136c_A14221_DG1136N_A14244	12	23485001	38192000	14707	0.013548	3	NEUT
DG1136c_A14221_DG1136N_A14244	12	38192001	38252000	60	-0.207989	2	HETD
DG1136c_A14221_DG1136N_A14244	12	38252001	115420000	77168	0.024127	3	NEUT
DG1136c_A14221_DG1136N_A14244	12	115420001	133852000	18432	0.294335	4	GAIN
DG1136c_A14221_DG1136N_A14244	13	1	86283000	86283	-0.308502	2	HETD
DG1136c_A14221_DG1136N_A14244	13	86283001	112931000	26648	0.029044	3	NEUT
DG1136c_A14221_DG1136N_A14244	13	112931001	112974000	43	0.325245	4	GAIN
DG1136c_A14221_DG1136N_A14244	13	112974001	115170000	2196	0.07688	3	NEUT
DG1136c_A14221_DG1136N_A14244	14	1	19060000	19060	-0.302576	2	HETD
DG1136c_A14221_DG1136N_A14244	14	19060001	19200000	140	-0.105047	3	NEUT
DG1136c_A14221_DG1136N_A14244	14	19200001	19323000	123	-0.194663	2	HETD
DG1136c_A14221_DG1136N_A14244	14	19323001	21681000	2358	0.032139	3	NEUT
DG1136c_A14221_DG1136N_A14244	14	21681001	21801000	120	-0.317585	2	HETD
DG1136c_A14221_DG1136N_A14244	14	21801001	22390000	589	0.061565	3	NEUT
DG1136c_A14221_DG1136N_A14244	14	22390001	23003000	613	0.290945	4	GAIN
DG1136c_A14221_DG1136N_A14244	14	23003001	56966000	33963	0.027716	3	NEUT
DG1136c_A14221_DG1136N_A14244	14	56966001	73995000	17029	-0.293277	2	HETD
DG1136c_A14221_DG1136N_A14244	14	73995001	74023000	28	-0.008504	3	NEUT
DG1136c_A14221_DG1136N_A14244	14	74023001	99161000	25138	-0.299575	2	HETD
DG1136c_A14221_DG1136N_A14244	14	99161001	105610000	6449	0.061612	3	NEUT
DG1136c_A14221_DG1136N_A14244	14	105610001	105713000	103	0.208926	4	GAIN
DG1136c_A14221_DG1136N_A14244	14	105713001	106079000	366	0.077758	3	NEUT
DG1136c_A14221_DG1136N_A14244	14	106079001	106217000	138	0.210852	4	GAIN
DG1136c_A14221_DG1136N_A14244	14	106217001	106316000	99	0.083669	3	NEUT
DG1136c_A14221_DG1136N_A14244	14	106316001	106456000	140	0.182111	4	GAIN
DG1136c_A14221_DG1136N_A14244	14	106456001	107350000	894	0.085776	3	NEUT
DG1136c_A14221_DG1136N_A14244	15	1	102475000	102475	-0.294127	2	HETD
DG1136c_A14221_DG1136N_A14244	15	102475001	102532000	57	-0.015505	3	NEUT
DG1136c_A14221_DG1136N_A14244	16	1	15049000	15049	0.046861	3	NEUT
DG1136c_A14221_DG1136N_A14244	16	15049001	15124000	75	0.233845	4	GAIN
DG1136c_A14221_DG1136N_A14244	16	15124001	16387000	1263	0.045357	3	NEUT
DG1136c_A14221_DG1136N_A14244	16	16387001	16491000	104	0.216946	4	GAIN
DG1136c_A14221_DG1136N_A14244	16	16491001	18473000	1982	0.056383	3	NEUT
DG1136c_A14221_DG1136N_A14244	16	18473001	18489000	16	0.430322	4	GAIN
DG1136c_A14221_DG1136N_A14244	16	18489001	19773000	1284	0.042606	3	NEUT
DG1136c_A14221_DG1136N_A14244	16	19773001	19909000	136	-0.335558	2	HETD
DG1136c_A14221_DG1136N_A14244	16	19909001	23249000	3340	0.043549	3	NEUT
DG1136c_A14221_DG1136N_A14244	16	23249001	23311000	62	0.515794	5	AMP
DG1136c_A14221_DG1136N_A14244	16	23311001	25842000	2531	0.308005	4	GAIN
DG1136c_A14221_DG1136N_A14244	16	25842001	33971000	8129	0.04426	3	NEUT
DG1136c_A14221_DG1136N_A14244	16	33971001	46387000	12416	-0.315962	2	HETD
DG1136c_A14221_DG1136N_A14244	16	46387001	46457000	70	-0.064466	3	NEUT
DG1136c_A14221_DG1136N_A14244	16	46457001	90174000	43717	-0.295232	2	HETD
DG1136c_A14221_DG1136N_A14244	16	90174001	90211000	37	-0.052027	3	NEUT
DG1136c_A14221_DG1136N_A14244	16	90211001	90355000	144	-0.255266	2	HETD
DG1136c_A14221_DG1136N_A14244	17	1	3631000	3631	0.064603	3	NEUT
DG1136c_A14221_DG1136N_A14244	17	3631001	40344000	36713	-0.293228	2	HETD
DG1136c_A14221_DG1136N_A14244	17	40344001	44218000	3874	0.046132	3	NEUT
DG1136c_A14221_DG1136N_A14244	17	44218001	44368000	150	-0.186434	2	HETD
DG1136c_A14221_DG1136N_A14244	17	44368001	44783000	415	0.295825	4	GAIN
DG1136c_A14221_DG1136N_A14244	17	44783001	69370000	24587	0.036276	3	NEUT
DG1136c_A14221_DG1136N_A14244	17	69370001	69412000	42	0.304139	4	GAIN
DG1136c_A14221_DG1136N_A14244	17	69412001	71150000	1738	-0.293022	2	HETD
DG1136c_A14221_DG1136N_A14244	17	71150001	81196000	10046	0.055284	3	NEUT
DG1136c_A14221_DG1136N_A14244	18	1	15375000	15375	0.036212	3	NEUT
DG1136c_A14221_DG1136N_A14244	18	15375001	18511000	3136	-0.231093	2	HETD
DG1136c_A14221_DG1136N_A14244	18	18511001	78078000	59567	0.019633	3	NEUT
DG1136c_A14221_DG1136N_A14244	20	1	29806000	29806	0.021779	3	NEUT
DG1136c_A14221_DG1136N_A14244	20	29806001	29831000	25	0.26961	4	GAIN
DG1136c_A14221_DG1136N_A14244	20	29831001	30077000	246	0.03865	3	NEUT
DG1136c_A14221_DG1136N_A14244	20	30077001	47734000	17657	0.312145	4	GAIN
DG1136c_A14221_DG1136N_A14244	20	47734001	63026000	15292	0.050322	3	NEUT
DG1136c_A14221_DG1136N_A14244	Y	1	59374000	59374	NA	3	NEUT
DG1136c_A14221_DG1136N_A14244	19	1	205000	205	-0.032706	3	NEUT
DG1136c_A14221_DG1136N_A14244	19	205001	5330000	5125	-0.295776	2	HETD
DG1136c_A14221_DG1136N_A14244	19	5330001	27742000	22412	0.040324	3	NEUT
DG1136c_A14221_DG1136N_A14244	19	27742001	27836000	94	0.293091	4	GAIN
DG1136c_A14221_DG1136N_A14244	19	27836001	27892000	56	0.035699	3	NEUT
DG1136c_A14221_DG1136N_A14244	19	27892001	28303000	411	0.304589	4	GAIN
DG1136c_A14221_DG1136N_A14244	19	28303001	29236000	933	0.706384	5	AMP
DG1136c_A14221_DG1136N_A14244	19	29236001	30358000	1122	0.915069	6	HLAMP
DG1136c_A14221_DG1136N_A14244	19	30358001	30643000	285	0.597963	5	AMP
DG1136c_A14221_DG1136N_A14244	19	30643001	30705000	62	0.233145	4	GAIN
DG1136c_A14221_DG1136N_A14244	19	30705001	30854000	149	0.126254	3	NEUT
DG1136c_A14221_DG1136N_A14244	19	30854001	30961000	107	0.213505	4	GAIN
DG1136c_A14221_DG1136N_A14244	19	30961001	31020000	59	0.05801	3	NEUT
DG1136c_A14221_DG1136N_A14244	19	31020001	31716000	696	0.179968	4	GAIN
DG1136c_A14221_DG1136N_A14244	19	31716001	31955000	239	0.152925	3	NEUT
DG1136c_A14221_DG1136N_A14244	19	31955001	32164000	209	0.199453	4	GAIN
DG1136c_A14221_DG1136N_A14244	19	32164001	32547000	383	0.119358	3	NEUT
DG1136c_A14221_DG1136N_A14244	19	32547001	32888000	341	0.177718	4	GAIN
DG1136c_A14221_DG1136N_A14244	19	32888001	32969000	81	0.110073	3	NEUT
DG1136c_A14221_DG1136N_A14244	19	32969001	33147000	178	0.194145	4	GAIN
DG1136c_A14221_DG1136N_A14244	19	33147001	33571000	424	0.118632	3	NEUT
DG1136c_A14221_DG1136N_A14244	19	33571001	43258000	9687	-0.288479	2	HETD
DG1136c_A14221_DG1136N_A14244	19	43258001	43327000	69	-0.106316	3	NEUT
DG1136c_A14221_DG1136N_A14244	19	43327001	55329000	12002	-0.294042	2	HETD
DG1136c_A14221_DG1136N_A14244	19	55329001	55363000	34	0.051765	3	NEUT
DG1136c_A14221_DG1136N_A14244	19	55363001	59129000	3766	-0.261915	2	HETD
DG1136c_A14221_DG1136N_A14244	22	1	16457000	16457	-0.036808	3	NEUT
DG1136c_A14221_DG1136N_A14244	22	16457001	24343000	7886	-0.274523	2	HETD
DG1136c_A14221_DG1136N_A14244	22	24343001	24398000	55	0.09345	3	NEUT
DG1136c_A14221_DG1136N_A14244	22	24398001	51232000	26834	-0.285755	2	HETD
DG1136c_A14221_DG1136N_A14244	22	51232001	51305000	73	0.047777	3	NEUT
DG1136c_A14221_DG1136N_A14244	21	1	9469000	9469	-0.210594	2	HETD
DG1136c_A14221_DG1136N_A14244	21	9469001	9701000	232	-0.096516	3	NEUT
DG1136c_A14221_DG1136N_A14244	21	9701001	9895000	194	-0.226529	2	HETD
DG1136c_A14221_DG1136N_A14244	21	9895001	10647000	752	-0.064619	3	NEUT
DG1136c_A14221_DG1136N_A14244	21	10647001	10767000	120	-0.315801	2	HETD
DG1136c_A14221_DG1136N_A14244	21	10767001	11121000	354	-0.04522	3	NEUT
DG1136c_A14221_DG1136N_A14244	21	11121001	14376000	3255	-0.200977	2	HETD
DG1136c_A14221_DG1136N_A14244	21	14376001	42093000	27717	0.029296	3	NEUT
DG1136c_A14221_DG1136N_A14244	21	42093001	48103000	6010	-0.266123	2	HETD
DG1136c_A14221_DG1136N_A14244	21	48103001	48130000	27	0.0199	3	NEUT
DG1136c_A14221_DG1136N_A14244	MT	1	17000	17	1.88341	6	HLAMP
DG1136e_A14225_DG1136N_A14244	1	1	377000	377	-0.103555	3	NEUT
DG1136e_A14225_DG1136N_A14244	1	377001	393000	16	-0.315859	2	HETD
DG1136e_A14225_DG1136N_A14244	1	393001	32207000	31814	0.108001	3	NEUT
DG1136e_A14225_DG1136N_A14244	1	32207001	32223000	16	-0.40295	2	HETD
DG1136e_A14225_DG1136N_A14244	1	32223001	91378000	59155	0.076183	3	NEUT
DG1136e_A14225_DG1136N_A14244	1	91378001	91450000	72	-0.590374	2	HETD
DG1136e_A14225_DG1136N_A14244	1	91450001	142731000	51281	0.064918	3	NEUT
DG1136e_A14225_DG1136N_A14244	1	142731001	142923000	192	-0.311801	2	HETD
DG1136e_A14225_DG1136N_A14244	1	142923001	143374000	451	-0.127657	3	NEUT
DG1136e_A14225_DG1136N_A14244	1	143374001	143504000	130	-0.291671	2	HETD
DG1136e_A14225_DG1136N_A14244	1	143504001	144093000	589	0.109493	3	NEUT
DG1136e_A14225_DG1136N_A14244	1	144093001	144275000	182	0.386188	4	GAIN
DG1136e_A14225_DG1136N_A14244	1	144275001	145311000	1036	0.122754	3	NEUT
DG1136e_A14225_DG1136N_A14244	1	145311001	145370000	59	0.309004	4	GAIN
DG1136e_A14225_DG1136N_A14244	1	145370001	146162000	792	0.141552	3	NEUT
DG1136e_A14225_DG1136N_A14244	1	146162001	146237000	75	0.340311	4	GAIN
DG1136e_A14225_DG1136N_A14244	1	146237001	146409000	172	0.078663	3	NEUT
DG1136e_A14225_DG1136N_A14244	1	146409001	146466000	57	0.400495	4	GAIN
DG1136e_A14225_DG1136N_A14244	1	146466001	148252000	1786	0.121006	3	NEUT
DG1136e_A14225_DG1136N_A14244	1	148252001	148341000	89	0.33785	4	GAIN
DG1136e_A14225_DG1136N_A14244	1	148341001	148740000	399	0.12824	3	NEUT
DG1136e_A14225_DG1136N_A14244	1	148740001	148787000	47	0.327605	4	GAIN
DG1136e_A14225_DG1136N_A14244	1	148787001	249251000	100464	0.073727	3	NEUT
DG1136e_A14225_DG1136N_A14244	2	1	37968000	37968	0.074825	3	NEUT
DG1136e_A14225_DG1136N_A14244	2	37968001	38003000	35	-0.29218	2	HETD
DG1136e_A14225_DG1136N_A14244	2	38003001	87633000	49630	0.06403	3	NEUT
DG1136e_A14225_DG1136N_A14244	2	87633001	87661000	28	0.362396	4	GAIN
DG1136e_A14225_DG1136N_A14244	2	87661001	90317000	2656	0.10524	3	NEUT
DG1136e_A14225_DG1136N_A14244	2	90317001	90394000	77	0.330497	4	GAIN
DG1136e_A14225_DG1136N_A14244	2	90394001	212987000	122593	0.064	3	NEUT
DG1136e_A14225_DG1136N_A14244	2	212987001	213000000	13	-0.578481	2	HETD
DG1136e_A14225_DG1136N_A14244	2	213000001	243200000	30200	0.080178	3	NEUT
DG1136e_A14225_DG1136N_A14244	3	1	53027000	53027	-0.523384	2	HETD
DG1136e_A14225_DG1136N_A14244	3	53027001	53039000	12	-1.46211	1	HOMD
DG1136e_A14225_DG1136N_A14244	3	53039001	61059000	8020	-0.533564	2	HETD
DG1136e_A14225_DG1136N_A14244	3	61059001	61718000	659	0.517101	4	GAIN
DG1136e_A14225_DG1136N_A14244	3	61718001	115990000	54272	0.051355	3	NEUT
DG1136e_A14225_DG1136N_A14244	3	115990001	116170000	180	-0.585501	2	HETD
DG1136e_A14225_DG1136N_A14244	3	116170001	116273000	103	0.055839	3	NEUT
DG1136e_A14225_DG1136N_A14244	3	116273001	116369000	96	-0.549788	2	HETD
DG1136e_A14225_DG1136N_A14244	3	116369001	117373000	1004	0.040457	3	NEUT
DG1136e_A14225_DG1136N_A14244	3	117373001	117498000	125	-0.580047	2	HETD
DG1136e_A14225_DG1136N_A14244	3	117498001	167577000	50079	0.07037	3	NEUT
DG1136e_A14225_DG1136N_A14244	3	167577001	175203000	7626	0.510944	4	GAIN
DG1136e_A14225_DG1136N_A14244	3	175203001	175382000	179	0.227398	3	NEUT
DG1136e_A14225_DG1136N_A14244	3	175382001	189826000	14444	0.513492	4	GAIN
DG1136e_A14225_DG1136N_A14244	3	189826001	195200000	5374	0.081192	3	NEUT
DG1136e_A14225_DG1136N_A14244	3	195200001	195224000	24	0.30808	4	GAIN
DG1136e_A14225_DG1136N_A14244	3	195224001	196927000	1703	0.110233	3	NEUT
DG1136e_A14225_DG1136N_A14244	3	196927001	197013000	86	-0.28648	2	HETD
DG1136e_A14225_DG1136N_A14244	3	197013001	198023000	1010	0.079567	3	NEUT
DG1136e_A14225_DG1136N_A14244	4	1	9212000	9212	0.103927	3	NEUT
DG1136e_A14225_DG1136N_A14244	4	9212001	9370000	158	0.327471	4	GAIN
DG1136e_A14225_DG1136N_A14244	4	9370001	21836000	12466	0.062644	3	NEUT
DG1136e_A14225_DG1136N_A14244	4	21836001	22119000	283	-0.553441	2	HETD
DG1136e_A14225_DG1136N_A14244	4	22119001	49599000	27480	0.04529	3	NEUT
DG1136e_A14225_DG1136N_A14244	4	49599001	49652000	53	-0.393761	2	HETD
DG1136e_A14225_DG1136N_A14244	4	49652001	130388000	80736	0.050737	3	NEUT
DG1136e_A14225_DG1136N_A14244	4	130388001	146919000	16531	-0.5545	2	HETD
DG1136e_A14225_DG1136N_A14244	4	146919001	146927000	8	0.165467	3	NEUT
DG1136e_A14225_DG1136N_A14244	4	146927001	147884000	957	-0.535255	2	HETD
DG1136e_A14225_DG1136N_A14244	4	147884001	151278000	3394	0.079062	3	NEUT
DG1136e_A14225_DG1136N_A14244	4	151278001	151668000	390	-0.555733	2	HETD
DG1136e_A14225_DG1136N_A14244	4	151668001	191155000	39487	0.048025	3	NEUT
DG1136e_A14225_DG1136N_A14244	5	1	22506000	22506	0.059197	3	NEUT
DG1136e_A14225_DG1136N_A14244	5	22506001	40583000	18077	0.475552	4	GAIN
DG1136e_A14225_DG1136N_A14244	5	40583001	59187000	18604	0.052247	3	NEUT
DG1136e_A14225_DG1136N_A14244	5	59187001	59252000	65	-0.563796	2	HETD
DG1136e_A14225_DG1136N_A14244	5	59252001	69026000	9774	0.066365	3	NEUT
DG1136e_A14225_DG1136N_A14244	5	69026001	69055000	29	0.337376	4	GAIN
DG1136e_A14225_DG1136N_A14244	5	69055001	69491000	436	0.183535	3	NEUT
DG1136e_A14225_DG1136N_A14244	5	69491001	69547000	56	0.278877	4	GAIN
DG1136e_A14225_DG1136N_A14244	5	69547001	142046000	72499	0.055871	3	NEUT
DG1136e_A14225_DG1136N_A14244	5	142046001	142121000	75	0.556056	4	GAIN
DG1136e_A14225_DG1136N_A14244	5	142121001	178977000	36856	0.082433	3	NEUT
DG1136e_A14225_DG1136N_A14244	5	178977001	180722000	1745	-0.509294	2	HETD
DG1136e_A14225_DG1136N_A14244	5	180722001	180784000	62	-0.130175	3	NEUT
DG1136e_A14225_DG1136N_A14244	5	180784001	180838000	54	-0.297504	2	HETD
DG1136e_A14225_DG1136N_A14244	5	180838001	180916000	78	-0.07913	3	NEUT
DG1136e_A14225_DG1136N_A14244	6	1	34421000	34421	0.093024	3	NEUT
DG1136e_A14225_DG1136N_A14244	6	34421001	34604000	183	0.846708	5	AMP
DG1136e_A14225_DG1136N_A14244	6	34604001	34631000	27	0.493237	4	GAIN
DG1136e_A14225_DG1136N_A14244	6	34631001	57823000	23192	0.070478	3	NEUT
DG1136e_A14225_DG1136N_A14244	6	57823001	58138000	315	0.477686	4	GAIN
DG1136e_A14225_DG1136N_A14244	6	58138001	61891000	3753	0.06168	3	NEUT
DG1136e_A14225_DG1136N_A14244	6	61891001	135122000	73231	0.470835	4	GAIN
DG1136e_A14225_DG1136N_A14244	6	135122001	157183000	22061	-0.552292	2	HETD
DG1136e_A14225_DG1136N_A14244	6	157183001	157459000	276	-1.71195	1	HOMD
DG1136e_A14225_DG1136N_A14244	6	157459001	170940000	13481	-0.541484	2	HETD
DG1136e_A14225_DG1136N_A14244	6	170940001	171010000	70	-0.100126	3	NEUT
DG1136e_A14225_DG1136N_A14244	6	171010001	171116000	106	-0.32683	2	HETD
DG1136e_A14225_DG1136N_A14244	7	1	45000	45	-0.170246	3	NEUT
DG1136e_A14225_DG1136N_A14244	7	45001	151000	106	-0.460819	2	HETD
DG1136e_A14225_DG1136N_A14244	7	151001	160000	9	0.158395	3	NEUT
DG1136e_A14225_DG1136N_A14244	7	160001	4622000	4462	-0.521671	2	HETD
DG1136e_A14225_DG1136N_A14244	7	4622001	4640000	18	0.127552	3	NEUT
DG1136e_A14225_DG1136N_A14244	7	4640001	5959000	1319	-0.522232	2	HETD
DG1136e_A14225_DG1136N_A14244	7	5959001	6017000	58	-0.183088	3	NEUT
DG1136e_A14225_DG1136N_A14244	7	6017001	6194000	177	-0.533029	2	HETD
DG1136e_A14225_DG1136N_A14244	7	6194001	17150000	10956	0.041192	3	NEUT
DG1136e_A14225_DG1136N_A14244	7	17150001	17171000	21	-0.599717	2	HETD
DG1136e_A14225_DG1136N_A14244	7	17171001	38294000	21123	0.073609	3	NEUT
DG1136e_A14225_DG1136N_A14244	7	38294001	38385000	91	0.33206	4	GAIN
DG1136e_A14225_DG1136N_A14244	7	38385001	142417000	104032	0.066404	3	NEUT
DG1136e_A14225_DG1136N_A14244	7	142417001	142495000	78	0.313426	4	GAIN
DG1136e_A14225_DG1136N_A14244	7	142495001	142705000	210	0.10957	3	NEUT
DG1136e_A14225_DG1136N_A14244	7	142705001	142715000	10	-0.562394	2	HETD
DG1136e_A14225_DG1136N_A14244	7	142715001	152099000	9384	0.071068	3	NEUT
DG1136e_A14225_DG1136N_A14244	7	152099001	152113000	14	-0.365655	2	HETD
DG1136e_A14225_DG1136N_A14244	7	152113001	159139000	7026	0.097299	3	NEUT
DG1136e_A14225_DG1136N_A14244	X	1	561000	561	0.584997	5	AMP
DG1136e_A14225_DG1136N_A14244	X	561001	1521000	960	0.555501	4	GAIN
DG1136e_A14225_DG1136N_A14244	X	1521001	1612000	91	0.63774	5	AMP
DG1136e_A14225_DG1136N_A14244	X	1612001	2170000	558	0.562555	4	GAIN
DG1136e_A14225_DG1136N_A14244	X	2170001	2411000	241	0.607027	5	AMP
DG1136e_A14225_DG1136N_A14244	X	2411001	35150000	32739	0.482595	4	GAIN
DG1136e_A14225_DG1136N_A14244	X	35150001	35166000	16	0.02326	3	NEUT
DG1136e_A14225_DG1136N_A14244	X	35166001	39325000	4159	0.485151	4	GAIN
DG1136e_A14225_DG1136N_A14244	X	39325001	44778000	5453	0.057592	3	NEUT
DG1136e_A14225_DG1136N_A14244	X	44778001	44888000	110	-0.544853	2	HETD
DG1136e_A14225_DG1136N_A14244	X	44888001	49197000	4309	0.074144	3	NEUT
DG1136e_A14225_DG1136N_A14244	X	49197001	49371000	174	0.31023	4	GAIN
DG1136e_A14225_DG1136N_A14244	X	49371001	58564000	9193	0.065692	3	NEUT
DG1136e_A14225_DG1136N_A14244	X	58564001	61726000	3162	0.49914	4	GAIN
DG1136e_A14225_DG1136N_A14244	X	61726001	155271000	93545	0.037209	3	NEUT
DG1136e_A14225_DG1136N_A14244	8	1	158000	158	-0.044165	3	NEUT
DG1136e_A14225_DG1136N_A14244	8	158001	6829000	6671	-0.560251	2	HETD
DG1136e_A14225_DG1136N_A14244	8	6829001	6866000	37	-0.138377	3	NEUT
DG1136e_A14225_DG1136N_A14244	8	6866001	7032000	166	-0.466939	2	HETD
DG1136e_A14225_DG1136N_A14244	8	7032001	7053000	21	-0.169338	3	NEUT
DG1136e_A14225_DG1136N_A14244	8	7053001	7064000	11	-1.27703	1	HOMD
DG1136e_A14225_DG1136N_A14244	8	7064001	7096000	32	-0.511093	2	HETD
DG1136e_A14225_DG1136N_A14244	8	7096001	7153000	57	-0.045277	3	NEUT
DG1136e_A14225_DG1136N_A14244	8	7153001	7253000	100	-0.594624	2	HETD
DG1136e_A14225_DG1136N_A14244	8	7253001	7463000	210	-0.111791	3	NEUT
DG1136e_A14225_DG1136N_A14244	8	7463001	7558000	95	-0.384313	2	HETD
DG1136e_A14225_DG1136N_A14244	8	7558001	7744000	186	-0.083639	3	NEUT
DG1136e_A14225_DG1136N_A14244	8	7744001	7755000	11	-0.622696	2	HETD
DG1136e_A14225_DG1136N_A14244	8	7755001	7940000	185	-0.111073	3	NEUT
DG1136e_A14225_DG1136N_A14244	8	7940001	7977000	37	-0.823132	1	HOMD
DG1136e_A14225_DG1136N_A14244	8	7977001	8032000	55	-0.149681	3	NEUT
DG1136e_A14225_DG1136N_A14244	8	8032001	11956000	3924	-0.528307	2	HETD
DG1136e_A14225_DG1136N_A14244	8	11956001	11979000	23	0.195491	3	NEUT
DG1136e_A14225_DG1136N_A14244	8	11979001	12013000	34	-0.419001	2	HETD
DG1136e_A14225_DG1136N_A14244	8	12013001	12087000	74	-0.129013	3	NEUT
DG1136e_A14225_DG1136N_A14244	8	12087001	12205000	118	-0.488869	2	HETD
DG1136e_A14225_DG1136N_A14244	8	12205001	12404000	199	-0.11119	3	NEUT
DG1136e_A14225_DG1136N_A14244	8	12404001	12442000	38	-0.276934	2	HETD
DG1136e_A14225_DG1136N_A14244	8	12442001	12467000	25	-0.180561	3	NEUT
DG1136e_A14225_DG1136N_A14244	8	12467001	33887000	21420	-0.553328	2	HETD
DG1136e_A14225_DG1136N_A14244	8	33887001	33899000	12	-1.58179	1	HOMD
DG1136e_A14225_DG1136N_A14244	8	33899001	37716000	3817	-0.56972	2	HETD
DG1136e_A14225_DG1136N_A14244	8	37716001	56997000	19281	0.066057	3	NEUT
DG1136e_A14225_DG1136N_A14244	8	56997001	57012000	15	-0.538674	2	HETD
DG1136e_A14225_DG1136N_A14244	8	57012001	90027000	33015	0.045632	3	NEUT
DG1136e_A14225_DG1136N_A14244	8	90027001	90082000	55	-0.576519	2	HETD
DG1136e_A14225_DG1136N_A14244	8	90082001	97044000	6962	0.046544	3	NEUT
DG1136e_A14225_DG1136N_A14244	8	97044001	102258000	5214	0.831403	5	AMP
DG1136e_A14225_DG1136N_A14244	8	102258001	102409000	151	1.10819	6	HLAMP
DG1136e_A14225_DG1136N_A14244	8	102409001	142272000	39863	0.815985	5	AMP
DG1136e_A14225_DG1136N_A14244	8	142272001	142448000	176	1.16762	6	HLAMP
DG1136e_A14225_DG1136N_A14244	8	142448001	145314000	2866	0.881678	5	AMP
DG1136e_A14225_DG1136N_A14244	8	145314001	145500000	186	0.970149	6	HLAMP
DG1136e_A14225_DG1136N_A14244	8	145500001	146365000	865	0.870597	5	AMP
DG1136e_A14225_DG1136N_A14244	9	1	43212000	43212	0.05817	3	NEUT
DG1136e_A14225_DG1136N_A14244	9	43212001	43410000	198	0.323659	5	AMP
DG1136e_A14225_DG1136N_A14244	9	43410001	44245000	835	0.128996	3	NEUT
DG1136e_A14225_DG1136N_A14244	9	44245001	44278000	33	0.729025	5	AMP
DG1136e_A14225_DG1136N_A14244	9	44278001	44441000	163	0.144554	3	NEUT
DG1136e_A14225_DG1136N_A14244	9	44441001	44545000	104	0.452897	5	AMP
DG1136e_A14225_DG1136N_A14244	9	44545001	69693000	25148	0.103752	3	NEUT
DG1136e_A14225_DG1136N_A14244	9	69693001	69707000	14	-0.414025	2	HETD
DG1136e_A14225_DG1136N_A14244	9	69707001	70338000	631	0.025514	3	NEUT
DG1136e_A14225_DG1136N_A14244	9	70338001	70359000	21	0.343712	4	GAIN
DG1136e_A14225_DG1136N_A14244	9	70359001	131510000	61151	0.053885	3	NEUT
DG1136e_A14225_DG1136N_A14244	9	131510001	131619000	109	0.490246	4	GAIN
DG1136e_A14225_DG1136N_A14244	9	131619001	141214000	9595	0.076365	3	NEUT
DG1136e_A14225_DG1136N_A14244	10	1	7123000	7123	0.385697	4	GAIN
DG1136e_A14225_DG1136N_A14244	10	7123001	11660000	4537	0.716074	5	AMP
DG1136e_A14225_DG1136N_A14244	10	11660001	11878000	218	1.03679	6	HLAMP
DG1136e_A14225_DG1136N_A14244	10	11878001	33118000	21240	0.731569	5	AMP
DG1136e_A14225_DG1136N_A14244	10	33118001	34662000	1544	0.382072	4	GAIN
DG1136e_A14225_DG1136N_A14244	10	34662001	39154000	4492	-0.101131	3	NEUT
DG1136e_A14225_DG1136N_A14244	10	39154001	42383000	3229	-0.358211	2	HETD
DG1136e_A14225_DG1136N_A14244	10	42383001	42406000	23	0.249618	3	NEUT
DG1136e_A14225_DG1136N_A14244	10	42406001	42435000	29	-0.3709	2	HETD
DG1136e_A14225_DG1136N_A14244	10	42435001	44304000	1869	-0.166784	3	NEUT
DG1136e_A14225_DG1136N_A14244	10	44304001	46834000	2530	-0.364261	2	HETD
DG1136e_A14225_DG1136N_A14244	10	46834001	46895000	61	-0.209934	3	NEUT
DG1136e_A14225_DG1136N_A14244	10	46895001	47151000	256	-0.391199	2	HETD
DG1136e_A14225_DG1136N_A14244	10	47151001	47166000	15	-0.079544	3	NEUT
DG1136e_A14225_DG1136N_A14244	10	47166001	47771000	605	-0.440036	2	HETD
DG1136e_A14225_DG1136N_A14244	10	47771001	47792000	21	-0.076853	3	NEUT
DG1136e_A14225_DG1136N_A14244	10	47792001	47927000	135	-0.557269	2	HETD
DG1136e_A14225_DG1136N_A14244	10	47927001	47952000	25	-0.173603	3	NEUT
DG1136e_A14225_DG1136N_A14244	10	47952001	48115000	163	-0.504338	2	HETD
DG1136e_A14225_DG1136N_A14244	10	48115001	48130000	15	-0.059093	3	NEUT
DG1136e_A14225_DG1136N_A14244	10	48130001	48276000	146	-0.383943	2	HETD
DG1136e_A14225_DG1136N_A14244	10	48276001	48435000	159	-0.121252	3	NEUT
DG1136e_A14225_DG1136N_A14244	10	48435001	48671000	236	-0.330102	2	HETD
DG1136e_A14225_DG1136N_A14244	10	48671001	48731000	60	-0.137902	3	NEUT
DG1136e_A14225_DG1136N_A14244	10	48731001	54278000	5547	-0.530106	2	HETD
DG1136e_A14225_DG1136N_A14244	10	54278001	77728000	23450	0.07944	3	NEUT
DG1136e_A14225_DG1136N_A14244	10	77728001	79711000	1983	0.525859	4	GAIN
DG1136e_A14225_DG1136N_A14244	10	79711001	84192000	4481	0.080387	3	NEUT
DG1136e_A14225_DG1136N_A14244	10	84192001	101647000	17455	-0.541163	2	HETD
DG1136e_A14225_DG1136N_A14244	10	101647001	105079000	3432	0.093844	3	NEUT
DG1136e_A14225_DG1136N_A14244	10	105079001	133865000	28786	-0.54507	2	HETD
DG1136e_A14225_DG1136N_A14244	10	133865001	135502000	1637	0.11614	3	NEUT
DG1136e_A14225_DG1136N_A14244	10	135502001	135535000	33	0.307512	4	GAIN
DG1136e_A14225_DG1136N_A14244	11	1	143000	143	-0.103134	3	NEUT
DG1136e_A14225_DG1136N_A14244	11	143001	964000	821	-0.440922	2	HETD
DG1136e_A14225_DG1136N_A14244	11	964001	1067000	103	0.211501	3	NEUT
DG1136e_A14225_DG1136N_A14244	11	1067001	4968000	3901	-0.457389	2	HETD
DG1136e_A14225_DG1136N_A14244	11	4968001	4980000	12	0.04453	3	NEUT
DG1136e_A14225_DG1136N_A14244	11	4980001	9794000	4814	-0.481296	2	HETD
DG1136e_A14225_DG1136N_A14244	11	9794001	58838000	49044	0.068833	3	NEUT
DG1136e_A14225_DG1136N_A14244	11	58838001	58881000	43	-0.48778	2	HETD
DG1136e_A14225_DG1136N_A14244	11	58881001	60586000	1705	0.15453	3	NEUT
DG1136e_A14225_DG1136N_A14244	11	60586001	61074000	488	0.281225	4	GAIN
DG1136e_A14225_DG1136N_A14244	11	61074001	61219000	145	0.230151	3	NEUT
DG1136e_A14225_DG1136N_A14244	11	61219001	61556000	337	0.293836	4	GAIN
DG1136e_A14225_DG1136N_A14244	11	61556001	62283000	727	0.236689	3	NEUT
DG1136e_A14225_DG1136N_A14244	11	62283001	62388000	105	0.29614	4	GAIN
DG1136e_A14225_DG1136N_A14244	11	62388001	62517000	129	0.209944	3	NEUT
DG1136e_A14225_DG1136N_A14244	11	62517001	62564000	47	0.301161	4	GAIN
DG1136e_A14225_DG1136N_A14244	11	62564001	62698000	134	0.191801	3	NEUT
DG1136e_A14225_DG1136N_A14244	11	62698001	62727000	29	0.352759	4	GAIN
DG1136e_A14225_DG1136N_A14244	11	62727001	63570000	843	0.234769	3	NEUT
DG1136e_A14225_DG1136N_A14244	11	63570001	63690000	120	0.291789	4	GAIN
DG1136e_A14225_DG1136N_A14244	11	63690001	63770000	80	0.214959	3	NEUT
DG1136e_A14225_DG1136N_A14244	11	63770001	63899000	129	0.287799	4	GAIN
DG1136e_A14225_DG1136N_A14244	11	63899001	63954000	55	0.180737	3	NEUT
DG1136e_A14225_DG1136N_A14244	11	63954001	64039000	85	0.309926	4	GAIN
DG1136e_A14225_DG1136N_A14244	11	64039001	64463000	424	0.241762	3	NEUT
DG1136e_A14225_DG1136N_A14244	11	64463001	64514000	51	0.321194	4	GAIN
DG1136e_A14225_DG1136N_A14244	11	64514001	64593000	79	0.188017	3	NEUT
DG1136e_A14225_DG1136N_A14244	11	64593001	64811000	218	0.267617	4	GAIN
DG1136e_A14225_DG1136N_A14244	11	64811001	65189000	378	0.230216	3	NEUT
DG1136e_A14225_DG1136N_A14244	11	65189001	65231000	42	0.324829	4	GAIN
DG1136e_A14225_DG1136N_A14244	11	65231001	65291000	60	0.170592	3	NEUT
DG1136e_A14225_DG1136N_A14244	11	65291001	65449000	158	0.296414	4	GAIN
DG1136e_A14225_DG1136N_A14244	11	65449001	65730000	281	0.242803	3	NEUT
DG1136e_A14225_DG1136N_A14244	11	65730001	65747000	17	0.392799	4	GAIN
DG1136e_A14225_DG1136N_A14244	11	65747001	66054000	307	0.243198	3	NEUT
DG1136e_A14225_DG1136N_A14244	11	66054001	66124000	70	0.269658	4	GAIN
DG1136e_A14225_DG1136N_A14244	11	66124001	66233000	109	0.221995	3	NEUT
DG1136e_A14225_DG1136N_A14244	11	66233001	66268000	35	0.328375	4	GAIN
DG1136e_A14225_DG1136N_A14244	11	66268001	66316000	48	0.202315	3	NEUT
DG1136e_A14225_DG1136N_A14244	11	66316001	66404000	88	0.301118	4	GAIN
DG1136e_A14225_DG1136N_A14244	11	66404001	66579000	175	0.208886	3	NEUT
DG1136e_A14225_DG1136N_A14244	11	66579001	66763000	184	0.278091	4	GAIN
DG1136e_A14225_DG1136N_A14244	11	66763001	67047000	284	0.240908	3	NEUT
DG1136e_A14225_DG1136N_A14244	11	67047001	67214000	167	0.307191	4	GAIN
DG1136e_A14225_DG1136N_A14244	11	67214001	67565000	351	0.228376	3	NEUT
DG1136e_A14225_DG1136N_A14244	11	67565001	67820000	255	0.281263	4	GAIN
DG1136e_A14225_DG1136N_A14244	11	67820001	68113000	293	0.225487	3	NEUT
DG1136e_A14225_DG1136N_A14244	11	68113001	68205000	92	0.281859	4	GAIN
DG1136e_A14225_DG1136N_A14244	11	68205001	68299000	94	0.189097	3	NEUT
DG1136e_A14225_DG1136N_A14244	11	68299001	68334000	35	0.322426	4	GAIN
DG1136e_A14225_DG1136N_A14244	11	68334001	68756000	422	0.216989	3	NEUT
DG1136e_A14225_DG1136N_A14244	11	68756001	68847000	91	0.293725	4	GAIN
DG1136e_A14225_DG1136N_A14244	11	68847001	69008000	161	0.239081	3	NEUT
DG1136e_A14225_DG1136N_A14244	11	69008001	69071000	63	0.311944	4	GAIN
DG1136e_A14225_DG1136N_A14244	11	69071001	69184000	113	0.216757	3	NEUT
DG1136e_A14225_DG1136N_A14244	11	69184001	69303000	119	0.292773	4	GAIN
DG1136e_A14225_DG1136N_A14244	11	69303001	69603000	300	0.212183	3	NEUT
DG1136e_A14225_DG1136N_A14244	11	69603001	69629000	26	0.330306	4	GAIN
DG1136e_A14225_DG1136N_A14244	11	69629001	69834000	205	0.205964	3	NEUT
DG1136e_A14225_DG1136N_A14244	11	69834001	69877000	43	0.325533	4	GAIN
DG1136e_A14225_DG1136N_A14244	11	69877001	69946000	69	0.202135	3	NEUT
DG1136e_A14225_DG1136N_A14244	11	69946001	70043000	97	0.270859	4	GAIN
DG1136e_A14225_DG1136N_A14244	11	70043001	70305000	262	0.23259	3	NEUT
DG1136e_A14225_DG1136N_A14244	11	70305001	70383000	78	0.29163	4	GAIN
DG1136e_A14225_DG1136N_A14244	11	70383001	70422000	39	0.213948	3	NEUT
DG1136e_A14225_DG1136N_A14244	11	70422001	70511000	89	0.283289	4	GAIN
DG1136e_A14225_DG1136N_A14244	11	70511001	70538000	27	0.139337	3	NEUT
DG1136e_A14225_DG1136N_A14244	11	70538001	70707000	169	0.294884	4	GAIN
DG1136e_A14225_DG1136N_A14244	11	70707001	70781000	74	0.220191	3	NEUT
DG1136e_A14225_DG1136N_A14244	11	70781001	70868000	87	0.291561	4	GAIN
DG1136e_A14225_DG1136N_A14244	11	70868001	70965000	97	0.221578	3	NEUT
DG1136e_A14225_DG1136N_A14244	11	70965001	71012000	47	0.314893	4	GAIN
DG1136e_A14225_DG1136N_A14244	11	71012001	71277000	265	0.23176	3	NEUT
DG1136e_A14225_DG1136N_A14244	11	71277001	71332000	55	0.286925	4	GAIN
DG1136e_A14225_DG1136N_A14244	11	71332001	71466000	134	0.243899	3	NEUT
DG1136e_A14225_DG1136N_A14244	11	71466001	71508000	42	0.303921	4	GAIN
DG1136e_A14225_DG1136N_A14244	11	71508001	71778000	270	0.234238	3	NEUT
DG1136e_A14225_DG1136N_A14244	11	71778001	71850000	72	0.291484	4	GAIN
DG1136e_A14225_DG1136N_A14244	11	71850001	72319000	469	0.242883	3	NEUT
DG1136e_A14225_DG1136N_A14244	11	72319001	72506000	187	0.271266	4	GAIN
DG1136e_A14225_DG1136N_A14244	11	72506001	72991000	485	0.226768	3	NEUT
DG1136e_A14225_DG1136N_A14244	11	72991001	73096000	105	0.309598	4	GAIN
DG1136e_A14225_DG1136N_A14244	11	73096001	73795000	699	0.230074	3	NEUT
DG1136e_A14225_DG1136N_A14244	11	73795001	73833000	38	0.34397	4	GAIN
DG1136e_A14225_DG1136N_A14244	11	73833001	74715000	882	0.220895	3	NEUT
DG1136e_A14225_DG1136N_A14244	11	74715001	74745000	30	0.325283	4	GAIN
DG1136e_A14225_DG1136N_A14244	11	74745001	74866000	121	0.23552	3	NEUT
DG1136e_A14225_DG1136N_A14244	11	74866001	75063000	197	0.278777	4	GAIN
DG1136e_A14225_DG1136N_A14244	11	75063001	75157000	94	0.238719	3	NEUT
DG1136e_A14225_DG1136N_A14244	11	75157001	75234000	77	0.29097	4	GAIN
DG1136e_A14225_DG1136N_A14244	11	75234001	75679000	445	0.226117	3	NEUT
DG1136e_A14225_DG1136N_A14244	11	75679001	75706000	27	0.337341	4	GAIN
DG1136e_A14225_DG1136N_A14244	11	75706001	75874000	168	0.227238	3	NEUT
DG1136e_A14225_DG1136N_A14244	11	75874001	76022000	148	0.302687	4	GAIN
DG1136e_A14225_DG1136N_A14244	11	76022001	76298000	276	0.211808	3	NEUT
DG1136e_A14225_DG1136N_A14244	11	76298001	76520000	222	0.276224	4	GAIN
DG1136e_A14225_DG1136N_A14244	11	76520001	76606000	86	0.190985	3	NEUT
DG1136e_A14225_DG1136N_A14244	11	76606001	76633000	27	0.326008	4	GAIN
DG1136e_A14225_DG1136N_A14244	11	76633001	76777000	144	0.190455	3	NEUT
DG1136e_A14225_DG1136N_A14244	11	76777001	76922000	145	0.267728	4	GAIN
DG1136e_A14225_DG1136N_A14244	11	76922001	78834000	1912	0.219743	3	NEUT
DG1136e_A14225_DG1136N_A14244	11	78834001	78890000	56	0.287541	4	GAIN
DG1136e_A14225_DG1136N_A14244	11	78890001	79305000	415	0.230776	3	NEUT
DG1136e_A14225_DG1136N_A14244	11	79305001	79389000	84	0.284223	4	GAIN
DG1136e_A14225_DG1136N_A14244	11	79389001	86497000	7108	0.19388	3	NEUT
DG1136e_A14225_DG1136N_A14244	11	86497001	86579000	82	0.279935	4	GAIN
DG1136e_A14225_DG1136N_A14244	11	86579001	89668000	3089	0.200877	3	NEUT
DG1136e_A14225_DG1136N_A14244	11	89668001	89718000	50	0.335845	4	GAIN
DG1136e_A14225_DG1136N_A14244	11	89718001	89782000	64	0.224176	3	NEUT
DG1136e_A14225_DG1136N_A14244	11	89782001	89814000	32	0.314227	4	GAIN
DG1136e_A14225_DG1136N_A14244	11	89814001	94460000	4646	0.187896	3	NEUT
DG1136e_A14225_DG1136N_A14244	11	94460001	94540000	80	0.301917	4	GAIN
DG1136e_A14225_DG1136N_A14244	11	94540001	95816000	1276	0.208273	3	NEUT
DG1136e_A14225_DG1136N_A14244	11	95816001	95866000	50	0.304031	4	GAIN
DG1136e_A14225_DG1136N_A14244	11	95866001	101872000	6006	0.187766	3	NEUT
DG1136e_A14225_DG1136N_A14244	11	101872001	101904000	32	0.310081	4	GAIN
DG1136e_A14225_DG1136N_A14244	11	101904001	128745000	26841	0.161213	3	NEUT
DG1136e_A14225_DG1136N_A14244	11	128745001	131660000	2915	0.502033	4	GAIN
DG1136e_A14225_DG1136N_A14244	11	131660001	132139000	479	0.608273	5	AMP
DG1136e_A14225_DG1136N_A14244	11	132139001	133164000	1025	0.56998	4	GAIN
DG1136e_A14225_DG1136N_A14244	11	133164001	135007000	1843	0.593739	5	AMP
DG1136e_A14225_DG1136N_A14244	12	1	94000	94	0.361811	4	GAIN
DG1136e_A14225_DG1136N_A14244	12	94001	170000	76	-0.197299	3	NEUT
DG1136e_A14225_DG1136N_A14244	12	170001	9633000	9463	-0.526563	2	HETD
DG1136e_A14225_DG1136N_A14244	12	9633001	9733000	100	0.130422	3	NEUT
DG1136e_A14225_DG1136N_A14244	12	9733001	11217000	1484	-0.549981	2	HETD
DG1136e_A14225_DG1136N_A14244	12	11217001	11254000	37	-1.41224	1	HOMD
DG1136e_A14225_DG1136N_A14244	12	11254001	23473000	12219	-0.558488	2	HETD
DG1136e_A14225_DG1136N_A14244	12	23473001	115419000	91946	0.062313	3	NEUT
DG1136e_A14225_DG1136N_A14244	12	115419001	132609000	17190	0.511958	4	GAIN
DG1136e_A14225_DG1136N_A14244	12	132609001	132694000	85	0.651061	5	AMP
DG1136e_A14225_DG1136N_A14244	12	132694001	133852000	1158	0.534118	4	GAIN
DG1136e_A14225_DG1136N_A14244	13	1	34132000	34132	-0.544677	2	HETD
DG1136e_A14225_DG1136N_A14244	13	34132001	34146000	14	-1.40802	1	HOMD
DG1136e_A14225_DG1136N_A14244	13	34146001	38072000	3926	-0.558653	2	HETD
DG1136e_A14225_DG1136N_A14244	13	38072001	38085000	13	-1.83393	1	HOMD
DG1136e_A14225_DG1136N_A14244	13	38085001	86283000	48198	-0.574733	2	HETD
DG1136e_A14225_DG1136N_A14244	13	86283001	115170000	28887	0.071251	3	NEUT
DG1136e_A14225_DG1136N_A14244	14	1	19113000	19113	-0.31643	2	HETD
DG1136e_A14225_DG1136N_A14244	14	19113001	21680000	2567	0.051311	3	NEUT
DG1136e_A14225_DG1136N_A14244	14	21680001	21801000	121	-0.554297	2	HETD
DG1136e_A14225_DG1136N_A14244	14	21801001	22433000	632	0.109668	3	NEUT
DG1136e_A14225_DG1136N_A14244	14	22433001	22505000	72	0.314358	4	GAIN
DG1136e_A14225_DG1136N_A14244	14	22505001	22554000	49	0.203527	3	NEUT
DG1136e_A14225_DG1136N_A14244	14	22554001	22991000	437	0.384941	4	GAIN
DG1136e_A14225_DG1136N_A14244	14	22991001	56965000	33974	0.058359	3	NEUT
DG1136e_A14225_DG1136N_A14244	14	56965001	73997000	17032	-0.537077	2	HETD
DG1136e_A14225_DG1136N_A14244	14	73997001	74024000	27	0.053235	3	NEUT
DG1136e_A14225_DG1136N_A14244	14	74024001	99165000	25141	-0.551678	2	HETD
DG1136e_A14225_DG1136N_A14244	14	99165001	107350000	8185	0.106693	3	NEUT
DG1136e_A14225_DG1136N_A14244	15	1	20203000	20203	-0.502159	2	HETD
DG1136e_A14225_DG1136N_A14244	15	20203001	20258000	55	-0.891841	1	HOMD
DG1136e_A14225_DG1136N_A14244	15	20258001	20836000	578	-0.622838	2	HETD
DG1136e_A14225_DG1136N_A14244	15	20836001	20998000	162	-0.829383	1	HOMD
DG1136e_A14225_DG1136N_A14244	15	20998001	21036000	38	-0.613483	2	HETD
DG1136e_A14225_DG1136N_A14244	15	21036001	21284000	248	-0.845906	1	HOMD
DG1136e_A14225_DG1136N_A14244	15	21284001	21396000	112	-0.580826	2	HETD
DG1136e_A14225_DG1136N_A14244	15	21396001	22289000	893	-0.815016	1	HOMD
DG1136e_A14225_DG1136N_A14244	15	22289001	76885000	54596	-0.540933	2	HETD
DG1136e_A14225_DG1136N_A14244	15	76885001	76897000	12	0.110306	3	NEUT
DG1136e_A14225_DG1136N_A14244	15	76897001	102455000	25558	-0.532946	2	HETD
DG1136e_A14225_DG1136N_A14244	15	102455001	102532000	77	-0.053245	3	NEUT
DG1136e_A14225_DG1136N_A14244	16	1	14987000	14987	0.10408	3	NEUT
DG1136e_A14225_DG1136N_A14244	16	14987001	15014000	27	0.388679	4	GAIN
DG1136e_A14225_DG1136N_A14244	16	15014001	15033000	19	0.111074	3	NEUT
DG1136e_A14225_DG1136N_A14244	16	15033001	15124000	91	0.400631	4	GAIN
DG1136e_A14225_DG1136N_A14244	16	15124001	16387000	1263	0.121978	3	NEUT
DG1136e_A14225_DG1136N_A14244	16	16387001	16491000	104	0.389891	4	GAIN
DG1136e_A14225_DG1136N_A14244	16	16491001	18347000	1856	0.098136	3	NEUT
DG1136e_A14225_DG1136N_A14244	16	18347001	18380000	33	0.311549	4	GAIN
DG1136e_A14225_DG1136N_A14244	16	18380001	18396000	16	0.128169	3	NEUT
DG1136e_A14225_DG1136N_A14244	16	18396001	18517000	121	0.382794	4	GAIN
DG1136e_A14225_DG1136N_A14244	16	18517001	19773000	1256	0.112975	3	NEUT
DG1136e_A14225_DG1136N_A14244	16	19773001	19909000	136	-0.453156	2	HETD
DG1136e_A14225_DG1136N_A14244	16	19909001	23249000	3340	0.113963	3	NEUT
DG1136e_A14225_DG1136N_A14244	16	23249001	23315000	66	0.826191	5	AMP
DG1136e_A14225_DG1136N_A14244	16	23315001	25839000	2524	0.523103	4	GAIN
DG1136e_A14225_DG1136N_A14244	16	25839001	33971000	8132	0.103153	3	NEUT
DG1136e_A14225_DG1136N_A14244	16	33971001	33999000	28	-0.334485	2	HETD
DG1136e_A14225_DG1136N_A14244	16	33999001	34022000	23	-0.083622	3	NEUT
DG1136e_A14225_DG1136N_A14244	16	34022001	58944000	24922	-0.544148	2	HETD
DG1136e_A14225_DG1136N_A14244	16	58944001	58954000	10	-1.38704	1	HOMD
DG1136e_A14225_DG1136N_A14244	16	58954001	78372000	19418	-0.550952	2	HETD
DG1136e_A14225_DG1136N_A14244	16	78372001	78385000	13	-0.036803	3	NEUT
DG1136e_A14225_DG1136N_A14244	16	78385001	90173000	11788	-0.520013	2	HETD
DG1136e_A14225_DG1136N_A14244	16	90173001	90208000	35	-0.053444	3	NEUT
DG1136e_A14225_DG1136N_A14244	16	90208001	90283000	75	-0.400239	2	HETD
DG1136e_A14225_DG1136N_A14244	16	90283001	90355000	72	-0.125512	3	NEUT
DG1136e_A14225_DG1136N_A14244	17	1	3631000	3631	0.111225	3	NEUT
DG1136e_A14225_DG1136N_A14244	17	3631001	18929000	15298	-0.531368	2	HETD
DG1136e_A14225_DG1136N_A14244	17	18929001	18999000	70	-0.220899	3	NEUT
DG1136e_A14225_DG1136N_A14244	17	18999001	19027000	28	-0.349853	2	HETD
DG1136e_A14225_DG1136N_A14244	17	19027001	19058000	31	-0.122715	3	NEUT
DG1136e_A14225_DG1136N_A14244	17	19058001	34504000	15446	-0.526605	2	HETD
DG1136e_A14225_DG1136N_A14244	17	34504001	34553000	49	-1.27994	1	HOMD
DG1136e_A14225_DG1136N_A14244	17	34553001	34592000	39	-0.54198	2	HETD
DG1136e_A14225_DG1136N_A14244	17	34592001	34673000	81	-1.38109	1	HOMD
DG1136e_A14225_DG1136N_A14244	17	34673001	39422000	4749	-0.526519	2	HETD
DG1136e_A14225_DG1136N_A14244	17	39422001	39432000	10	-1.55501	1	HOMD
DG1136e_A14225_DG1136N_A14244	17	39432001	40343000	911	-0.503431	2	HETD
DG1136e_A14225_DG1136N_A14244	17	40343001	43623000	3280	0.102166	3	NEUT
DG1136e_A14225_DG1136N_A14244	17	43623001	43635000	12	0.465006	4	GAIN
DG1136e_A14225_DG1136N_A14244	17	43635001	43651000	16	0.056715	3	NEUT
DG1136e_A14225_DG1136N_A14244	17	43651001	43662000	11	-0.499409	2	HETD
DG1136e_A14225_DG1136N_A14244	17	43662001	44165000	503	0.107022	3	NEUT
DG1136e_A14225_DG1136N_A14244	17	44165001	44320000	155	-0.297798	2	HETD
DG1136e_A14225_DG1136N_A14244	17	44320001	44331000	11	-0.07551	3	NEUT
DG1136e_A14225_DG1136N_A14244	17	44331001	44369000	38	-0.28653	2	HETD
DG1136e_A14225_DG1136N_A14244	17	44369001	44434000	65	0.45736	4	GAIN
DG1136e_A14225_DG1136N_A14244	17	44434001	44566000	132	0.657319	5	AMP
DG1136e_A14225_DG1136N_A14244	17	44566001	44784000	218	0.515489	4	GAIN
DG1136e_A14225_DG1136N_A14244	17	44784001	46098000	1314	0.130653	3	NEUT
DG1136e_A14225_DG1136N_A14244	17	46098001	46140000	42	0.282774	4	GAIN
DG1136e_A14225_DG1136N_A14244	17	46140001	46196000	56	0.175458	3	NEUT
DG1136e_A14225_DG1136N_A14244	17	46196001	46208000	12	-1.72027	1	HOMD
DG1136e_A14225_DG1136N_A14244	17	46208001	62871000	16663	0.131274	3	NEUT
DG1136e_A14225_DG1136N_A14244	17	62871001	62888000	17	0.410774	4	GAIN
DG1136e_A14225_DG1136N_A14244	17	62888001	69370000	6482	0.132266	3	NEUT
DG1136e_A14225_DG1136N_A14244	17	69370001	69413000	43	0.502122	4	GAIN
DG1136e_A14225_DG1136N_A14244	17	69413001	71149000	1736	-0.540935	2	HETD
DG1136e_A14225_DG1136N_A14244	17	71149001	74722000	3573	0.117397	3	NEUT
DG1136e_A14225_DG1136N_A14244	17	74722001	74747000	25	-0.459518	2	HETD
DG1136e_A14225_DG1136N_A14244	17	74747001	81196000	6449	0.11709	3	NEUT
DG1136e_A14225_DG1136N_A14244	18	1	20000	20	-0.019559	3	NEUT
DG1136e_A14225_DG1136N_A14244	18	20001	42000	22	-0.381988	2	HETD
DG1136e_A14225_DG1136N_A14244	18	42001	78078000	78036	0.055047	3	NEUT
DG1136e_A14225_DG1136N_A14244	20	1	30077000	30077	0.066035	3	NEUT
DG1136e_A14225_DG1136N_A14244	20	30077001	36026000	5949	0.537181	4	GAIN
DG1136e_A14225_DG1136N_A14244	20	36026001	36086000	60	0.648588	5	AMP
DG1136e_A14225_DG1136N_A14244	20	36086001	36732000	646	0.528921	4	GAIN
DG1136e_A14225_DG1136N_A14244	20	36732001	36902000	170	0.611869	5	AMP
DG1136e_A14225_DG1136N_A14244	20	36902001	37037000	135	0.533551	4	GAIN
DG1136e_A14225_DG1136N_A14244	20	37037001	37117000	80	0.648624	5	AMP
DG1136e_A14225_DG1136N_A14244	20	37117001	47735000	10618	0.530631	4	GAIN
DG1136e_A14225_DG1136N_A14244	20	47735001	54506000	6771	0.092363	3	NEUT
DG1136e_A14225_DG1136N_A14244	20	54506001	54517000	11	-1.58976	1	HOMD
DG1136e_A14225_DG1136N_A14244	20	54517001	63026000	8509	0.109159	3	NEUT
DG1136e_A14225_DG1136N_A14244	Y	1	59374000	59374	NA	3	NEUT
DG1136e_A14225_DG1136N_A14244	19	1	240000	240	-0.033345	3	NEUT
DG1136e_A14225_DG1136N_A14244	19	240001	5330000	5090	-0.514579	2	HETD
DG1136e_A14225_DG1136N_A14244	19	5330001	8852000	3522	0.11227	3	NEUT
DG1136e_A14225_DG1136N_A14244	19	8852001	8897000	45	0.333852	4	GAIN
DG1136e_A14225_DG1136N_A14244	19	8897001	27742000	18845	0.098343	3	NEUT
DG1136e_A14225_DG1136N_A14244	19	27742001	27826000	84	0.38	4	GAIN
DG1136e_A14225_DG1136N_A14244	19	27826001	27893000	67	0.13051	3	NEUT
DG1136e_A14225_DG1136N_A14244	19	27893001	28519000	626	0.426766	4	GAIN
DG1136e_A14225_DG1136N_A14244	19	28519001	29389000	870	0.85005	5	AMP
DG1136e_A14225_DG1136N_A14244	19	29389001	29946000	557	0.958864	6	HLAMP
DG1136e_A14225_DG1136N_A14244	19	29946001	30050000	104	0.884699	5	AMP
DG1136e_A14225_DG1136N_A14244	19	30050001	30138000	88	0.988267	6	HLAMP
DG1136e_A14225_DG1136N_A14244	19	30138001	30444000	306	0.910842	5	AMP
DG1136e_A14225_DG1136N_A14244	19	30444001	30646000	202	0.530281	4	GAIN
DG1136e_A14225_DG1136N_A14244	19	30646001	33559000	2913	-0.101295	3	NEUT
DG1136e_A14225_DG1136N_A14244	19	33559001	42122000	8563	-0.521074	2	HETD
DG1136e_A14225_DG1136N_A14244	19	42122001	42132000	10	-1.66909	1	HOMD
DG1136e_A14225_DG1136N_A14244	19	42132001	42525000	393	-0.49885	2	HETD
DG1136e_A14225_DG1136N_A14244	19	42525001	42540000	15	-1.69394	1	HOMD
DG1136e_A14225_DG1136N_A14244	19	42540001	52132000	9592	-0.516322	2	HETD
DG1136e_A14225_DG1136N_A14244	19	52132001	52150000	18	0.061733	3	NEUT
DG1136e_A14225_DG1136N_A14244	19	52150001	55260000	3110	-0.526933	2	HETD
DG1136e_A14225_DG1136N_A14244	19	55260001	55293000	33	-0.406346	1	HOMD
DG1136e_A14225_DG1136N_A14244	19	55293001	55330000	37	-0.335266	2	HETD
DG1136e_A14225_DG1136N_A14244	19	55330001	55363000	33	0.058966	3	NEUT
DG1136e_A14225_DG1136N_A14244	19	55363001	59103000	3740	-0.513471	2	HETD
DG1136e_A14225_DG1136N_A14244	19	59103001	59129000	26	-0.091747	3	NEUT
DG1136e_A14225_DG1136N_A14244	22	1	16525000	16525	-0.025376	3	NEUT
DG1136e_A14225_DG1136N_A14244	22	16525001	24272000	7747	-0.50132	2	HETD
DG1136e_A14225_DG1136N_A14244	22	24272001	24291000	19	-1.38714	1	HOMD
DG1136e_A14225_DG1136N_A14244	22	24291001	24346000	55	-0.58647	2	HETD
DG1136e_A14225_DG1136N_A14244	22	24346001	24398000	52	0.096643	3	NEUT
DG1136e_A14225_DG1136N_A14244	22	24398001	51233000	26835	-0.523541	2	HETD
DG1136e_A14225_DG1136N_A14244	22	51233001	51305000	72	-0.059455	3	NEUT
DG1136e_A14225_DG1136N_A14244	21	1	9539000	9539	-0.258715	2	HETD
DG1136e_A14225_DG1136N_A14244	21	9539001	9717000	178	-0.141697	3	NEUT
DG1136e_A14225_DG1136N_A14244	21	9717001	9911000	194	-0.358803	2	HETD
DG1136e_A14225_DG1136N_A14244	21	9911001	10021000	110	-0.038316	3	NEUT
DG1136e_A14225_DG1136N_A14244	21	10021001	10133000	112	-0.300329	2	HETD
DG1136e_A14225_DG1136N_A14244	21	10133001	10187000	54	-0.160921	3	NEUT
DG1136e_A14225_DG1136N_A14244	21	10187001	10200000	13	-0.386119	2	HETD
DG1136e_A14225_DG1136N_A14244	21	10200001	10646000	446	-0.105971	3	NEUT
DG1136e_A14225_DG1136N_A14244	21	10646001	10767000	121	-0.359088	2	HETD
DG1136e_A14225_DG1136N_A14244	21	10767001	11056000	289	-0.119304	3	NEUT
DG1136e_A14225_DG1136N_A14244	21	11056001	11090000	34	-0.302101	2	HETD
DG1136e_A14225_DG1136N_A14244	21	11090001	11138000	48	-0.136805	3	NEUT
DG1136e_A14225_DG1136N_A14244	21	11138001	14371000	3233	-0.295511	2	HETD
DG1136e_A14225_DG1136N_A14244	21	14371001	42090000	27719	0.059366	3	NEUT
DG1136e_A14225_DG1136N_A14244	21	42090001	48103000	6013	-0.51014	2	HETD
DG1136e_A14225_DG1136N_A14244	21	48103001	48130000	27	-0.079926	3	NEUT
DG1136e_A14225_DG1136N_A14244	MT	1	17000	17	2.40645	6	HLAMP
DG1136g_A14229_DG1136N_A14244	1	1	154000	154	-0.090582	3	NEUT
DG1136g_A14229_DG1136N_A14244	1	154001	234000	80	-0.216688	2	HETD
DG1136g_A14229_DG1136N_A14244	1	234001	376000	142	-0.110543	3	NEUT
DG1136g_A14229_DG1136N_A14244	1	376001	421000	45	-0.23737	2	HETD
DG1136g_A14229_DG1136N_A14244	1	421001	1213000	792	0.106545	3	NEUT
DG1136g_A14229_DG1136N_A14244	1	1213001	1277000	64	0.324961	4	GAIN
DG1136g_A14229_DG1136N_A14244	1	1277001	1628000	351	0.163294	3	NEUT
DG1136g_A14229_DG1136N_A14244	1	1628001	1675000	47	0.326264	4	GAIN
DG1136g_A14229_DG1136N_A14244	1	1675001	1865000	190	0.148025	3	NEUT
DG1136g_A14229_DG1136N_A14244	1	1865001	1921000	56	0.278037	4	GAIN
DG1136g_A14229_DG1136N_A14244	1	1921001	3384000	1463	0.135603	3	NEUT
DG1136g_A14229_DG1136N_A14244	1	3384001	3437000	53	0.292492	4	GAIN
DG1136g_A14229_DG1136N_A14244	1	3437001	32207000	28770	0.145804	3	NEUT
DG1136g_A14229_DG1136N_A14244	1	32207001	32224000	17	-0.376196	2	HETD
DG1136g_A14229_DG1136N_A14244	1	32224001	41983000	9759	0.13791	3	NEUT
DG1136g_A14229_DG1136N_A14244	1	41983001	42041000	58	0.260623	4	GAIN
DG1136g_A14229_DG1136N_A14244	1	42041001	43809000	1768	0.154985	3	NEUT
DG1136g_A14229_DG1136N_A14244	1	43809001	43849000	40	0.294711	4	GAIN
DG1136g_A14229_DG1136N_A14244	1	43849001	47586000	3737	0.150981	3	NEUT
DG1136g_A14229_DG1136N_A14244	1	47586001	47637000	51	0.280698	4	GAIN
DG1136g_A14229_DG1136N_A14244	1	47637001	53968000	6331	0.122472	3	NEUT
DG1136g_A14229_DG1136N_A14244	1	53968001	54035000	67	0.296651	4	GAIN
DG1136g_A14229_DG1136N_A14244	1	54035001	69707000	15672	0.117827	3	NEUT
DG1136g_A14229_DG1136N_A14244	1	69707001	76280000	6573	-0.236309	2	HETD
DG1136g_A14229_DG1136N_A14244	1	76280001	76331000	51	-0.108034	3	NEUT
DG1136g_A14229_DG1136N_A14244	1	76331001	76647000	316	-0.186592	2	HETD
DG1136g_A14229_DG1136N_A14244	1	76647001	76686000	39	-0.09811	3	NEUT
DG1136g_A14229_DG1136N_A14244	1	76686001	76901000	215	-0.202579	2	HETD
DG1136g_A14229_DG1136N_A14244	1	76901001	77264000	363	-0.147972	3	NEUT
DG1136g_A14229_DG1136N_A14244	1	77264001	77309000	45	-0.241364	2	HETD
DG1136g_A14229_DG1136N_A14244	1	77309001	77381000	72	-0.12518	3	NEUT
DG1136g_A14229_DG1136N_A14244	1	77381001	77427000	46	-0.217437	2	HETD
DG1136g_A14229_DG1136N_A14244	1	77427001	77616000	189	-0.140184	3	NEUT
DG1136g_A14229_DG1136N_A14244	1	77616001	77689000	73	-0.225295	2	HETD
DG1136g_A14229_DG1136N_A14244	1	77689001	77747000	58	-0.117363	3	NEUT
DG1136g_A14229_DG1136N_A14244	1	77747001	77780000	33	-0.281603	2	HETD
DG1136g_A14229_DG1136N_A14244	1	77780001	77820000	40	-0.089172	3	NEUT
DG1136g_A14229_DG1136N_A14244	1	77820001	78313000	493	-0.190288	2	HETD
DG1136g_A14229_DG1136N_A14244	1	78313001	78371000	58	-0.12262	3	NEUT
DG1136g_A14229_DG1136N_A14244	1	78371001	78658000	287	-0.189332	2	HETD
DG1136g_A14229_DG1136N_A14244	1	78658001	78854000	196	-0.127924	3	NEUT
DG1136g_A14229_DG1136N_A14244	1	78854001	79311000	457	-0.184356	2	HETD
DG1136g_A14229_DG1136N_A14244	1	79311001	79359000	48	-0.08432	3	NEUT
DG1136g_A14229_DG1136N_A14244	1	79359001	81796000	2437	-0.20589	2	HETD
DG1136g_A14229_DG1136N_A14244	1	81796001	81849000	53	-0.105344	3	NEUT
DG1136g_A14229_DG1136N_A14244	1	81849001	82885000	1036	-0.216643	2	HETD
DG1136g_A14229_DG1136N_A14244	1	82885001	82920000	35	-0.048467	3	NEUT
DG1136g_A14229_DG1136N_A14244	1	82920001	82999000	79	-0.239944	2	HETD
DG1136g_A14229_DG1136N_A14244	1	82999001	83077000	78	-0.124937	3	NEUT
DG1136g_A14229_DG1136N_A14244	1	83077001	83601000	524	-0.206345	2	HETD
DG1136g_A14229_DG1136N_A14244	1	83601001	83630000	29	-0.062632	3	NEUT
DG1136g_A14229_DG1136N_A14244	1	83630001	83748000	118	-0.186551	2	HETD
DG1136g_A14229_DG1136N_A14244	1	83748001	83890000	142	-0.151373	3	NEUT
DG1136g_A14229_DG1136N_A14244	1	83890001	84071000	181	-0.219976	2	HETD
DG1136g_A14229_DG1136N_A14244	1	84071001	84239000	168	-0.125136	3	NEUT
DG1136g_A14229_DG1136N_A14244	1	84239001	84453000	214	-0.173231	2	HETD
DG1136g_A14229_DG1136N_A14244	1	84453001	84564000	111	-0.121231	3	NEUT
DG1136g_A14229_DG1136N_A14244	1	84564001	84770000	206	-0.199584	2	HETD
DG1136g_A14229_DG1136N_A14244	1	84770001	84945000	175	-0.143922	3	NEUT
DG1136g_A14229_DG1136N_A14244	1	84945001	85238000	293	-0.191368	2	HETD
DG1136g_A14229_DG1136N_A14244	1	85238001	85452000	214	-0.136567	3	NEUT
DG1136g_A14229_DG1136N_A14244	1	85452001	85711000	259	-0.199575	2	HETD
DG1136g_A14229_DG1136N_A14244	1	85711001	85748000	37	-0.09702	3	NEUT
DG1136g_A14229_DG1136N_A14244	1	85748001	85765000	17	-0.277262	2	HETD
DG1136g_A14229_DG1136N_A14244	1	85765001	85861000	96	-0.130501	3	NEUT
DG1136g_A14229_DG1136N_A14244	1	85861001	85949000	88	-0.210841	2	HETD
DG1136g_A14229_DG1136N_A14244	1	85949001	86096000	147	-0.094641	3	NEUT
DG1136g_A14229_DG1136N_A14244	1	86096001	86315000	219	-0.227932	2	HETD
DG1136g_A14229_DG1136N_A14244	1	86315001	86430000	115	-0.134063	3	NEUT
DG1136g_A14229_DG1136N_A14244	1	86430001	86863000	433	-0.203161	2	HETD
DG1136g_A14229_DG1136N_A14244	1	86863001	86916000	53	-0.120979	3	NEUT
DG1136g_A14229_DG1136N_A14244	1	86916001	86950000	34	-0.290974	2	HETD
DG1136g_A14229_DG1136N_A14244	1	86950001	87105000	155	-0.12116	3	NEUT
DG1136g_A14229_DG1136N_A14244	1	87105001	87133000	28	-0.251175	2	HETD
DG1136g_A14229_DG1136N_A14244	1	87133001	87290000	157	-0.132057	3	NEUT
DG1136g_A14229_DG1136N_A14244	1	87290001	87886000	596	-0.193646	2	HETD
DG1136g_A14229_DG1136N_A14244	1	87886001	87989000	103	-0.143211	3	NEUT
DG1136g_A14229_DG1136N_A14244	1	87989001	89014000	1025	-0.1875	2	HETD
DG1136g_A14229_DG1136N_A14244	1	89014001	89068000	54	-0.106657	3	NEUT
DG1136g_A14229_DG1136N_A14244	1	89068001	89172000	104	-0.19878	2	HETD
DG1136g_A14229_DG1136N_A14244	1	89172001	89270000	98	-0.119014	3	NEUT
DG1136g_A14229_DG1136N_A14244	1	89270001	89305000	35	-0.259484	2	HETD
DG1136g_A14229_DG1136N_A14244	1	89305001	89908000	603	-0.134764	3	NEUT
DG1136g_A14229_DG1136N_A14244	1	89908001	89946000	38	-0.258129	2	HETD
DG1136g_A14229_DG1136N_A14244	1	89946001	89991000	45	-0.097169	3	NEUT
DG1136g_A14229_DG1136N_A14244	1	89991001	90213000	222	-0.176425	2	HETD
DG1136g_A14229_DG1136N_A14244	1	90213001	90429000	216	-0.115114	3	NEUT
DG1136g_A14229_DG1136N_A14244	1	90429001	90498000	69	-0.207356	2	HETD
DG1136g_A14229_DG1136N_A14244	1	90498001	90556000	58	-0.120001	3	NEUT
DG1136g_A14229_DG1136N_A14244	1	90556001	90629000	73	-0.207451	2	HETD
DG1136g_A14229_DG1136N_A14244	1	90629001	90743000	114	-0.12114	3	NEUT
DG1136g_A14229_DG1136N_A14244	1	90743001	90908000	165	-0.191912	2	HETD
DG1136g_A14229_DG1136N_A14244	1	90908001	91025000	117	-0.137029	3	NEUT
DG1136g_A14229_DG1136N_A14244	1	91025001	91200000	175	-0.235032	2	HETD
DG1136g_A14229_DG1136N_A14244	1	91200001	91316000	116	-0.096931	3	NEUT
DG1136g_A14229_DG1136N_A14244	1	91316001	91466000	150	-0.270503	2	HETD
DG1136g_A14229_DG1136N_A14244	1	91466001	91517000	51	-0.142102	3	NEUT
DG1136g_A14229_DG1136N_A14244	1	91517001	91826000	309	-0.17558	2	HETD
DG1136g_A14229_DG1136N_A14244	1	91826001	91938000	112	-0.119277	3	NEUT
DG1136g_A14229_DG1136N_A14244	1	91938001	92012000	74	-0.178527	2	HETD
DG1136g_A14229_DG1136N_A14244	1	92012001	92083000	71	-0.123114	3	NEUT
DG1136g_A14229_DG1136N_A14244	1	92083001	92409000	326	-0.193453	2	HETD
DG1136g_A14229_DG1136N_A14244	1	92409001	92444000	35	-0.15016	3	NEUT
DG1136g_A14229_DG1136N_A14244	1	92444001	93079000	635	-0.180792	2	HETD
DG1136g_A14229_DG1136N_A14244	1	93079001	93107000	28	-0.073767	3	NEUT
DG1136g_A14229_DG1136N_A14244	1	93107001	93271000	164	-0.214696	2	HETD
DG1136g_A14229_DG1136N_A14244	1	93271001	93309000	38	-0.069311	3	NEUT
DG1136g_A14229_DG1136N_A14244	1	93309001	93473000	164	-0.170241	2	HETD
DG1136g_A14229_DG1136N_A14244	1	93473001	93507000	34	-0.070799	3	NEUT
DG1136g_A14229_DG1136N_A14244	1	93507001	93629000	122	-0.225162	2	HETD
DG1136g_A14229_DG1136N_A14244	1	93629001	93656000	27	-0.081311	3	NEUT
DG1136g_A14229_DG1136N_A14244	1	93656001	93827000	171	-0.202948	2	HETD
DG1136g_A14229_DG1136N_A14244	1	93827001	93874000	47	-0.095778	3	NEUT
DG1136g_A14229_DG1136N_A14244	1	93874001	93974000	100	-0.22159	2	HETD
DG1136g_A14229_DG1136N_A14244	1	93974001	94561000	587	-0.123414	3	NEUT
DG1136g_A14229_DG1136N_A14244	1	94561001	94681000	120	-0.200172	2	HETD
DG1136g_A14229_DG1136N_A14244	1	94681001	94840000	159	-0.129623	3	NEUT
DG1136g_A14229_DG1136N_A14244	1	94840001	94890000	50	-0.215967	2	HETD
DG1136g_A14229_DG1136N_A14244	1	94890001	95023000	133	-0.133936	3	NEUT
DG1136g_A14229_DG1136N_A14244	1	95023001	95066000	43	-0.221296	2	HETD
DG1136g_A14229_DG1136N_A14244	1	95066001	95093000	27	-0.07161	3	NEUT
DG1136g_A14229_DG1136N_A14244	1	95093001	95142000	49	-0.191814	2	HETD
DG1136g_A14229_DG1136N_A14244	1	95142001	95296000	154	-0.149211	3	NEUT
DG1136g_A14229_DG1136N_A14244	1	95296001	97068000	1772	-0.209132	2	HETD
DG1136g_A14229_DG1136N_A14244	1	97068001	97090000	22	-0.072029	3	NEUT
DG1136g_A14229_DG1136N_A14244	1	97090001	97141000	51	-0.222044	2	HETD
DG1136g_A14229_DG1136N_A14244	1	97141001	97162000	21	-0.032965	3	NEUT
DG1136g_A14229_DG1136N_A14244	1	97162001	97754000	592	-0.2263	2	HETD
DG1136g_A14229_DG1136N_A14244	1	97754001	97788000	34	-0.079099	3	NEUT
DG1136g_A14229_DG1136N_A14244	1	97788001	99490000	1702	-0.237087	2	HETD
DG1136g_A14229_DG1136N_A14244	1	99490001	99531000	41	-0.112794	3	NEUT
DG1136g_A14229_DG1136N_A14244	1	99531001	99711000	180	-0.240633	2	HETD
DG1136g_A14229_DG1136N_A14244	1	99711001	99777000	66	-0.130545	3	NEUT
DG1136g_A14229_DG1136N_A14244	1	99777001	99839000	62	-0.224805	2	HETD
DG1136g_A14229_DG1136N_A14244	1	99839001	99907000	68	-0.121149	3	NEUT
DG1136g_A14229_DG1136N_A14244	1	99907001	100581000	674	-0.186582	2	HETD
DG1136g_A14229_DG1136N_A14244	1	100581001	100637000	56	-0.100107	3	NEUT
DG1136g_A14229_DG1136N_A14244	1	100637001	100762000	125	-0.211972	2	HETD
DG1136g_A14229_DG1136N_A14244	1	100762001	100887000	125	-0.12227	3	NEUT
DG1136g_A14229_DG1136N_A14244	1	100887001	101139000	252	-0.18361	2	HETD
DG1136g_A14229_DG1136N_A14244	1	101139001	101241000	102	-0.137008	3	NEUT
DG1136g_A14229_DG1136N_A14244	1	101241001	101320000	79	-0.177831	2	HETD
DG1136g_A14229_DG1136N_A14244	1	101320001	101385000	65	-0.132397	3	NEUT
DG1136g_A14229_DG1136N_A14244	1	101385001	101472000	87	-0.19739	2	HETD
DG1136g_A14229_DG1136N_A14244	1	101472001	101559000	87	-0.144099	3	NEUT
DG1136g_A14229_DG1136N_A14244	1	101559001	101751000	192	-0.182957	2	HETD
DG1136g_A14229_DG1136N_A14244	1	101751001	101900000	149	-0.137868	3	NEUT
DG1136g_A14229_DG1136N_A14244	1	101900001	104137000	2237	-0.224785	2	HETD
DG1136g_A14229_DG1136N_A14244	1	104137001	104307000	170	-0.054436	3	NEUT
DG1136g_A14229_DG1136N_A14244	1	104307001	108563000	4256	-0.242153	2	HETD
DG1136g_A14229_DG1136N_A14244	1	108563001	108600000	37	-0.082603	3	NEUT
DG1136g_A14229_DG1136N_A14244	1	108600001	108753000	153	-0.168889	2	HETD
DG1136g_A14229_DG1136N_A14244	1	108753001	108783000	30	-0.073043	3	NEUT
DG1136g_A14229_DG1136N_A14244	1	108783001	108818000	35	-0.259852	2	HETD
DG1136g_A14229_DG1136N_A14244	1	108818001	109149000	331	-0.12619	3	NEUT
DG1136g_A14229_DG1136N_A14244	1	109149001	109263000	114	-0.223401	2	HETD
DG1136g_A14229_DG1136N_A14244	1	109263001	109331000	68	-0.108559	3	NEUT
DG1136g_A14229_DG1136N_A14244	1	109331001	109594000	263	-0.231127	2	HETD
DG1136g_A14229_DG1136N_A14244	1	109594001	110867000	1273	-0.124678	3	NEUT
DG1136g_A14229_DG1136N_A14244	1	110867001	110912000	45	-0.228141	2	HETD
DG1136g_A14229_DG1136N_A14244	1	110912001	111231000	319	-0.122524	3	NEUT
DG1136g_A14229_DG1136N_A14244	1	111231001	111358000	127	-0.198173	2	HETD
DG1136g_A14229_DG1136N_A14244	1	111358001	111414000	56	-0.115607	3	NEUT
DG1136g_A14229_DG1136N_A14244	1	111414001	111469000	55	-0.232292	2	HETD
DG1136g_A14229_DG1136N_A14244	1	111469001	111542000	73	-0.133505	3	NEUT
DG1136g_A14229_DG1136N_A14244	1	111542001	111657000	115	-0.187387	2	HETD
DG1136g_A14229_DG1136N_A14244	1	111657001	111761000	104	-0.103918	3	NEUT
DG1136g_A14229_DG1136N_A14244	1	111761001	111820000	59	-0.209797	2	HETD
DG1136g_A14229_DG1136N_A14244	1	111820001	112070000	250	-0.122769	3	NEUT
DG1136g_A14229_DG1136N_A14244	1	112070001	112198000	128	-0.192197	2	HETD
DG1136g_A14229_DG1136N_A14244	1	112198001	112347000	149	-0.127315	3	NEUT
DG1136g_A14229_DG1136N_A14244	1	112347001	112427000	80	-0.19138	2	HETD
DG1136g_A14229_DG1136N_A14244	1	112427001	112540000	113	-0.107776	3	NEUT
DG1136g_A14229_DG1136N_A14244	1	112540001	112618000	78	-0.225124	2	HETD
DG1136g_A14229_DG1136N_A14244	1	112618001	112806000	188	-0.126629	3	NEUT
DG1136g_A14229_DG1136N_A14244	1	112806001	113192000	386	-0.194362	2	HETD
DG1136g_A14229_DG1136N_A14244	1	113192001	113235000	43	-0.109793	3	NEUT
DG1136g_A14229_DG1136N_A14244	1	113235001	113329000	94	-0.196324	2	HETD
DG1136g_A14229_DG1136N_A14244	1	113329001	113386000	57	-0.116255	3	NEUT
DG1136g_A14229_DG1136N_A14244	1	113386001	113424000	38	-0.245885	2	HETD
DG1136g_A14229_DG1136N_A14244	1	113424001	113511000	87	-0.111203	3	NEUT
DG1136g_A14229_DG1136N_A14244	1	113511001	113596000	85	-0.209503	2	HETD
DG1136g_A14229_DG1136N_A14244	1	113596001	113782000	186	-0.148613	3	NEUT
DG1136g_A14229_DG1136N_A14244	1	113782001	113801000	19	-0.302238	2	HETD
DG1136g_A14229_DG1136N_A14244	1	113801001	113926000	125	-0.116554	3	NEUT
DG1136g_A14229_DG1136N_A14244	1	113926001	114016000	90	-0.192899	2	HETD
DG1136g_A14229_DG1136N_A14244	1	114016001	114081000	65	-0.115256	3	NEUT
DG1136g_A14229_DG1136N_A14244	1	114081001	114182000	101	-0.19137	2	HETD
DG1136g_A14229_DG1136N_A14244	1	114182001	114212000	30	-0.077399	3	NEUT
DG1136g_A14229_DG1136N_A14244	1	114212001	114374000	162	-0.177289	2	HETD
DG1136g_A14229_DG1136N_A14244	1	114374001	114534000	160	-0.136059	3	NEUT
DG1136g_A14229_DG1136N_A14244	1	114534001	114553000	19	-0.287835	2	HETD
DG1136g_A14229_DG1136N_A14244	1	114553001	114915000	362	-0.132429	3	NEUT
DG1136g_A14229_DG1136N_A14244	1	114915001	115248000	333	-0.192067	2	HETD
DG1136g_A14229_DG1136N_A14244	1	115248001	115306000	58	-0.108171	3	NEUT
DG1136g_A14229_DG1136N_A14244	1	115306001	115504000	198	-0.192952	2	HETD
DG1136g_A14229_DG1136N_A14244	1	115504001	115569000	65	-0.111536	3	NEUT
DG1136g_A14229_DG1136N_A14244	1	115569001	115670000	101	-0.1665	2	HETD
DG1136g_A14229_DG1136N_A14244	1	115670001	115702000	32	-0.042256	3	NEUT
DG1136g_A14229_DG1136N_A14244	1	115702001	115798000	96	-0.182921	2	HETD
DG1136g_A14229_DG1136N_A14244	1	115798001	116095000	297	-0.130055	3	NEUT
DG1136g_A14229_DG1136N_A14244	1	116095001	116148000	53	-0.190471	2	HETD
DG1136g_A14229_DG1136N_A14244	1	116148001	116224000	76	-0.134511	3	NEUT
DG1136g_A14229_DG1136N_A14244	1	116224001	116345000	121	-0.20948	2	HETD
DG1136g_A14229_DG1136N_A14244	1	116345001	116436000	91	-0.132438	3	NEUT
DG1136g_A14229_DG1136N_A14244	1	116436001	116508000	72	-0.191248	2	HETD
DG1136g_A14229_DG1136N_A14244	1	116508001	116538000	30	-0.068061	3	NEUT
DG1136g_A14229_DG1136N_A14244	1	116538001	116591000	53	-0.210812	2	HETD
DG1136g_A14229_DG1136N_A14244	1	116591001	117096000	505	-0.140355	3	NEUT
DG1136g_A14229_DG1136N_A14244	1	117096001	117131000	35	-0.256956	2	HETD
DG1136g_A14229_DG1136N_A14244	1	117131001	117209000	78	-0.10358	3	NEUT
DG1136g_A14229_DG1136N_A14244	1	117209001	117344000	135	-0.182218	2	HETD
DG1136g_A14229_DG1136N_A14244	1	117344001	117526000	182	-0.117105	3	NEUT
DG1136g_A14229_DG1136N_A14244	1	117526001	117640000	114	-0.184834	2	HETD
DG1136g_A14229_DG1136N_A14244	1	117640001	117903000	263	-0.11871	3	NEUT
DG1136g_A14229_DG1136N_A14244	1	117903001	118017000	114	-0.20274	2	HETD
DG1136g_A14229_DG1136N_A14244	1	118017001	143370000	25353	0.079785	3	NEUT
DG1136g_A14229_DG1136N_A14244	1	143370001	143497000	127	-0.240514	2	HETD
DG1136g_A14229_DG1136N_A14244	1	143497001	144149000	652	0.105992	3	NEUT
DG1136g_A14229_DG1136N_A14244	1	144149001	144275000	126	0.270774	4	GAIN
DG1136g_A14229_DG1136N_A14244	1	144275001	145247000	972	0.156527	3	NEUT
DG1136g_A14229_DG1136N_A14244	1	145247001	145369000	122	0.269135	4	GAIN
DG1136g_A14229_DG1136N_A14244	1	145369001	146155000	786	0.143495	3	NEUT
DG1136g_A14229_DG1136N_A14244	1	146155001	146237000	82	0.336306	4	GAIN
DG1136g_A14229_DG1136N_A14244	1	146237001	146407000	170	0.089606	3	NEUT
DG1136g_A14229_DG1136N_A14244	1	146407001	146466000	59	0.284582	4	GAIN
DG1136g_A14229_DG1136N_A14244	1	146466001	147561000	1095	0.136987	3	NEUT
DG1136g_A14229_DG1136N_A14244	1	147561001	147607000	46	0.280646	4	GAIN
DG1136g_A14229_DG1136N_A14244	1	147607001	148251000	644	0.152438	3	NEUT
DG1136g_A14229_DG1136N_A14244	1	148251001	148341000	90	0.245185	4	GAIN
DG1136g_A14229_DG1136N_A14244	1	148341001	161398000	13057	0.126608	3	NEUT
DG1136g_A14229_DG1136N_A14244	1	161398001	161445000	47	0.320519	4	GAIN
DG1136g_A14229_DG1136N_A14244	1	161445001	187574000	26129	0.056586	3	NEUT
DG1136g_A14229_DG1136N_A14244	1	187574001	187651000	77	-0.221693	2	HETD
DG1136g_A14229_DG1136N_A14244	1	187651001	188028000	377	-0.093597	3	NEUT
DG1136g_A14229_DG1136N_A14244	1	188028001	188136000	108	-0.209522	2	HETD
DG1136g_A14229_DG1136N_A14244	1	188136001	188234000	98	-0.113618	3	NEUT
DG1136g_A14229_DG1136N_A14244	1	188234001	188284000	50	-0.234941	2	HETD
DG1136g_A14229_DG1136N_A14244	1	188284001	188397000	113	-0.124282	3	NEUT
DG1136g_A14229_DG1136N_A14244	1	188397001	188435000	38	-0.267564	2	HETD
DG1136g_A14229_DG1136N_A14244	1	188435001	189629000	1194	-0.122565	3	NEUT
DG1136g_A14229_DG1136N_A14244	1	189629001	189658000	29	-0.245513	2	HETD
DG1136g_A14229_DG1136N_A14244	1	189658001	189713000	55	-0.098619	3	NEUT
DG1136g_A14229_DG1136N_A14244	1	189713001	189744000	31	-0.257498	2	HETD
DG1136g_A14229_DG1136N_A14244	1	189744001	190199000	455	-0.137901	3	NEUT
DG1136g_A14229_DG1136N_A14244	1	190199001	190298000	99	-0.194865	2	HETD
DG1136g_A14229_DG1136N_A14244	1	190298001	190377000	79	-0.13588	3	NEUT
DG1136g_A14229_DG1136N_A14244	1	190377001	190419000	42	-0.229156	2	HETD
DG1136g_A14229_DG1136N_A14244	1	190419001	190457000	38	-0.086889	3	NEUT
DG1136g_A14229_DG1136N_A14244	1	190457001	190508000	51	-0.182447	2	HETD
DG1136g_A14229_DG1136N_A14244	1	190508001	190587000	79	-0.10825	3	NEUT
DG1136g_A14229_DG1136N_A14244	1	190587001	190638000	51	-0.231232	2	HETD
DG1136g_A14229_DG1136N_A14244	1	190638001	190704000	66	-0.100638	3	NEUT
DG1136g_A14229_DG1136N_A14244	1	190704001	190743000	39	-0.20903	2	HETD
DG1136g_A14229_DG1136N_A14244	1	190743001	191066000	323	-0.104619	3	NEUT
DG1136g_A14229_DG1136N_A14244	1	191066001	191128000	62	-0.212685	2	HETD
DG1136g_A14229_DG1136N_A14244	1	191128001	191236000	108	-0.111433	3	NEUT
DG1136g_A14229_DG1136N_A14244	1	191236001	191395000	159	-0.182824	2	HETD
DG1136g_A14229_DG1136N_A14244	1	191395001	191692000	297	-0.136435	3	NEUT
DG1136g_A14229_DG1136N_A14244	1	191692001	191801000	109	-0.183118	2	HETD
DG1136g_A14229_DG1136N_A14244	1	191801001	191949000	148	-0.160528	3	NEUT
DG1136g_A14229_DG1136N_A14244	1	191949001	191987000	38	-0.238415	2	HETD
DG1136g_A14229_DG1136N_A14244	1	191987001	195013000	3026	-0.091967	3	NEUT
DG1136g_A14229_DG1136N_A14244	1	195013001	195041000	28	-0.24765	2	HETD
DG1136g_A14229_DG1136N_A14244	1	195041001	196584000	1543	-0.122672	3	NEUT
DG1136g_A14229_DG1136N_A14244	1	196584001	196659000	75	-0.199656	2	HETD
DG1136g_A14229_DG1136N_A14244	1	196659001	197277000	618	-0.069478	3	NEUT
DG1136g_A14229_DG1136N_A14244	1	197277001	197303000	26	-0.268274	2	HETD
DG1136g_A14229_DG1136N_A14244	1	197303001	249251000	51948	0.059241	3	NEUT
DG1136g_A14229_DG1136N_A14244	2	1	356000	356	0.182641	3	NEUT
DG1136g_A14229_DG1136N_A14244	2	356001	443000	87	0.250025	4	GAIN
DG1136g_A14229_DG1136N_A14244	2	443001	1203000	760	0.173251	3	NEUT
DG1136g_A14229_DG1136N_A14244	2	1203001	1236000	33	0.297848	4	GAIN
DG1136g_A14229_DG1136N_A14244	2	1236001	2665000	1429	0.173549	3	NEUT
DG1136g_A14229_DG1136N_A14244	2	2665001	2805000	140	0.257687	4	GAIN
DG1136g_A14229_DG1136N_A14244	2	2805001	5148000	2343	0.170996	3	NEUT
DG1136g_A14229_DG1136N_A14244	2	5148001	5164000	16	0.361435	4	GAIN
DG1136g_A14229_DG1136N_A14244	2	5164001	8263000	3099	0.15466	3	NEUT
DG1136g_A14229_DG1136N_A14244	2	8263001	8298000	35	0.283593	4	GAIN
DG1136g_A14229_DG1136N_A14244	2	8298001	8422000	124	0.166528	3	NEUT
DG1136g_A14229_DG1136N_A14244	2	8422001	8504000	82	0.247311	4	GAIN
DG1136g_A14229_DG1136N_A14244	2	8504001	8599000	95	0.189125	3	NEUT
DG1136g_A14229_DG1136N_A14244	2	8599001	8813000	214	0.259952	4	GAIN
DG1136g_A14229_DG1136N_A14244	2	8813001	8956000	143	0.176793	3	NEUT
DG1136g_A14229_DG1136N_A14244	2	8956001	9598000	642	0.243198	4	GAIN
DG1136g_A14229_DG1136N_A14244	2	9598001	9704000	106	0.180253	3	NEUT
DG1136g_A14229_DG1136N_A14244	2	9704001	9956000	252	0.254645	4	GAIN
DG1136g_A14229_DG1136N_A14244	2	9956001	10151000	195	0.208666	3	NEUT
DG1136g_A14229_DG1136N_A14244	2	10151001	10729000	578	0.258383	4	GAIN
DG1136g_A14229_DG1136N_A14244	2	10729001	10923000	194	0.18447	3	NEUT
DG1136g_A14229_DG1136N_A14244	2	10923001	11112000	189	0.230026	4	GAIN
DG1136g_A14229_DG1136N_A14244	2	11112001	11164000	52	0.127909	3	NEUT
DG1136g_A14229_DG1136N_A14244	2	11164001	11236000	72	0.250175	4	GAIN
DG1136g_A14229_DG1136N_A14244	2	11236001	11594000	358	0.195646	3	NEUT
DG1136g_A14229_DG1136N_A14244	2	11594001	11735000	141	0.254576	4	GAIN
DG1136g_A14229_DG1136N_A14244	2	11735001	11811000	76	0.181669	3	NEUT
DG1136g_A14229_DG1136N_A14244	2	11811001	12215000	404	0.254157	4	GAIN
DG1136g_A14229_DG1136N_A14244	2	12215001	12239000	24	0.105233	3	NEUT
DG1136g_A14229_DG1136N_A14244	2	12239001	12326000	87	0.252627	4	GAIN
DG1136g_A14229_DG1136N_A14244	2	12326001	12696000	370	0.186802	3	NEUT
DG1136g_A14229_DG1136N_A14244	2	12696001	12774000	78	0.250117	4	GAIN
DG1136g_A14229_DG1136N_A14244	2	12774001	18186000	5412	0.155875	3	NEUT
DG1136g_A14229_DG1136N_A14244	2	18186001	18248000	62	0.254644	4	GAIN
DG1136g_A14229_DG1136N_A14244	2	18248001	19092000	844	0.186615	3	NEUT
DG1136g_A14229_DG1136N_A14244	2	19092001	19222000	130	0.255667	4	GAIN
DG1136g_A14229_DG1136N_A14244	2	19222001	19945000	723	0.182957	3	NEUT
DG1136g_A14229_DG1136N_A14244	2	19945001	20123000	178	0.23806	4	GAIN
DG1136g_A14229_DG1136N_A14244	2	20123001	20705000	582	0.191761	3	NEUT
DG1136g_A14229_DG1136N_A14244	2	20705001	20872000	167	0.235222	4	GAIN
DG1136g_A14229_DG1136N_A14244	2	20872001	23526000	2654	0.155219	3	NEUT
DG1136g_A14229_DG1136N_A14244	2	23526001	23571000	45	0.292289	4	GAIN
DG1136g_A14229_DG1136N_A14244	2	23571001	24251000	680	0.176629	3	NEUT
DG1136g_A14229_DG1136N_A14244	2	24251001	24355000	104	0.249029	4	GAIN
DG1136g_A14229_DG1136N_A14244	2	24355001	24698000	343	0.169084	3	NEUT
DG1136g_A14229_DG1136N_A14244	2	24698001	24780000	82	0.255096	4	GAIN
DG1136g_A14229_DG1136N_A14244	2	24780001	25012000	232	0.182557	3	NEUT
DG1136g_A14229_DG1136N_A14244	2	25012001	25063000	51	0.299969	4	GAIN
DG1136g_A14229_DG1136N_A14244	2	25063001	25103000	40	0.143271	3	NEUT
DG1136g_A14229_DG1136N_A14244	2	25103001	25194000	91	0.266046	4	GAIN
DG1136g_A14229_DG1136N_A14244	2	25194001	25354000	160	0.177892	3	NEUT
DG1136g_A14229_DG1136N_A14244	2	25354001	25422000	68	0.267513	4	GAIN
DG1136g_A14229_DG1136N_A14244	2	25422001	25560000	138	0.185357	3	NEUT
DG1136g_A14229_DG1136N_A14244	2	25560001	25663000	103	0.249575	4	GAIN
DG1136g_A14229_DG1136N_A14244	2	25663001	25926000	263	0.180619	3	NEUT
DG1136g_A14229_DG1136N_A14244	2	25926001	25967000	41	0.316128	4	GAIN
DG1136g_A14229_DG1136N_A14244	2	25967001	26406000	439	0.183503	3	NEUT
DG1136g_A14229_DG1136N_A14244	2	26406001	26492000	86	0.240494	4	GAIN
DG1136g_A14229_DG1136N_A14244	2	26492001	26611000	119	0.158895	3	NEUT
DG1136g_A14229_DG1136N_A14244	2	26611001	26765000	154	0.25101	4	GAIN
DG1136g_A14229_DG1136N_A14244	2	26765001	27420000	655	0.198826	3	NEUT
DG1136g_A14229_DG1136N_A14244	2	27420001	27508000	88	0.27051	4	GAIN
DG1136g_A14229_DG1136N_A14244	2	27508001	27656000	148	0.149739	3	NEUT
DG1136g_A14229_DG1136N_A14244	2	27656001	27765000	109	0.251604	4	GAIN
DG1136g_A14229_DG1136N_A14244	2	27765001	27875000	110	0.1833	3	NEUT
DG1136g_A14229_DG1136N_A14244	2	27875001	28124000	249	0.253301	4	GAIN
DG1136g_A14229_DG1136N_A14244	2	28124001	28301000	177	0.183773	3	NEUT
DG1136g_A14229_DG1136N_A14244	2	28301001	28945000	644	0.234115	4	GAIN
DG1136g_A14229_DG1136N_A14244	2	28945001	29067000	122	0.157751	3	NEUT
DG1136g_A14229_DG1136N_A14244	2	29067001	29141000	74	0.253381	4	GAIN
DG1136g_A14229_DG1136N_A14244	2	29141001	29186000	45	0.129873	3	NEUT
DG1136g_A14229_DG1136N_A14244	2	29186001	29319000	133	0.256666	4	GAIN
DG1136g_A14229_DG1136N_A14244	2	29319001	29375000	56	0.157033	3	NEUT
DG1136g_A14229_DG1136N_A14244	2	29375001	29416000	41	0.286707	4	GAIN
DG1136g_A14229_DG1136N_A14244	2	29416001	29584000	168	0.188666	3	NEUT
DG1136g_A14229_DG1136N_A14244	2	29584001	29616000	32	0.319767	4	GAIN
DG1136g_A14229_DG1136N_A14244	2	29616001	29818000	202	0.184115	3	NEUT
DG1136g_A14229_DG1136N_A14244	2	29818001	29851000	33	0.274669	4	GAIN
DG1136g_A14229_DG1136N_A14244	2	29851001	29978000	127	0.17483	3	NEUT
DG1136g_A14229_DG1136N_A14244	2	29978001	30119000	141	0.233756	4	GAIN
DG1136g_A14229_DG1136N_A14244	2	30119001	30185000	66	0.135096	3	NEUT
DG1136g_A14229_DG1136N_A14244	2	30185001	30258000	73	0.274577	4	GAIN
DG1136g_A14229_DG1136N_A14244	2	30258001	30392000	134	0.184087	3	NEUT
DG1136g_A14229_DG1136N_A14244	2	30392001	38355000	7963	-0.24935	2	HETD
DG1136g_A14229_DG1136N_A14244	2	38355001	38404000	49	-0.107346	3	NEUT
DG1136g_A14229_DG1136N_A14244	2	38404001	43488000	5084	-0.236056	2	HETD
DG1136g_A14229_DG1136N_A14244	2	43488001	43539000	51	-0.110613	3	NEUT
DG1136g_A14229_DG1136N_A14244	2	43539001	46721000	3182	-0.223313	2	HETD
DG1136g_A14229_DG1136N_A14244	2	46721001	46776000	55	-0.11896	3	NEUT
DG1136g_A14229_DG1136N_A14244	2	46776001	65089000	18313	-0.266532	2	HETD
DG1136g_A14229_DG1136N_A14244	2	65089001	65124000	35	-0.090897	3	NEUT
DG1136g_A14229_DG1136N_A14244	2	65124001	70572000	5448	-0.222755	2	HETD
DG1136g_A14229_DG1136N_A14244	2	70572001	70596000	24	-0.0921	3	NEUT
DG1136g_A14229_DG1136N_A14244	2	70596001	71255000	659	-0.223719	2	HETD
DG1136g_A14229_DG1136N_A14244	2	71255001	71319000	64	-0.14508	3	NEUT
DG1136g_A14229_DG1136N_A14244	2	71319001	72240000	921	-0.215244	2	HETD
DG1136g_A14229_DG1136N_A14244	2	72240001	72256000	16	-0.002514	3	NEUT
DG1136g_A14229_DG1136N_A14244	2	72256001	74551000	2295	-0.223182	2	HETD
DG1136g_A14229_DG1136N_A14244	2	74551001	74599000	48	-0.106282	3	NEUT
DG1136g_A14229_DG1136N_A14244	2	74599001	79385000	4786	-0.261091	2	HETD
DG1136g_A14229_DG1136N_A14244	2	79385001	79427000	42	-0.089066	3	NEUT
DG1136g_A14229_DG1136N_A14244	2	79427001	79510000	83	-0.191148	2	HETD
DG1136g_A14229_DG1136N_A14244	2	79510001	79580000	70	-0.097788	3	NEUT
DG1136g_A14229_DG1136N_A14244	2	79580001	79668000	88	-0.198782	2	HETD
DG1136g_A14229_DG1136N_A14244	2	79668001	79737000	69	-0.10745	3	NEUT
DG1136g_A14229_DG1136N_A14244	2	79737001	79864000	127	-0.198351	2	HETD
DG1136g_A14229_DG1136N_A14244	2	79864001	79906000	42	-0.124945	3	NEUT
DG1136g_A14229_DG1136N_A14244	2	79906001	79938000	32	-0.259323	2	HETD
DG1136g_A14229_DG1136N_A14244	2	79938001	80024000	86	-0.115608	3	NEUT
DG1136g_A14229_DG1136N_A14244	2	80024001	80049000	25	-0.252848	2	HETD
DG1136g_A14229_DG1136N_A14244	2	80049001	80492000	443	-0.127783	3	NEUT
DG1136g_A14229_DG1136N_A14244	2	80492001	80553000	61	-0.250027	2	HETD
DG1136g_A14229_DG1136N_A14244	2	80553001	80646000	93	-0.133424	3	NEUT
DG1136g_A14229_DG1136N_A14244	2	80646001	80746000	100	-0.207972	2	HETD
DG1136g_A14229_DG1136N_A14244	2	80746001	80928000	182	-0.124625	3	NEUT
DG1136g_A14229_DG1136N_A14244	2	80928001	81067000	139	-0.193761	2	HETD
DG1136g_A14229_DG1136N_A14244	2	81067001	81099000	32	-0.092698	3	NEUT
DG1136g_A14229_DG1136N_A14244	2	81099001	81334000	235	-0.184651	2	HETD
DG1136g_A14229_DG1136N_A14244	2	81334001	87633000	6299	0.019541	3	NEUT
DG1136g_A14229_DG1136N_A14244	2	87633001	87731000	98	0.504678	4	GAIN
DG1136g_A14229_DG1136N_A14244	2	87731001	89630000	1899	0.075891	3	NEUT
DG1136g_A14229_DG1136N_A14244	2	89630001	89880000	250	0.44956	4	GAIN
DG1136g_A14229_DG1136N_A14244	2	89880001	90317000	437	0.04975	3	NEUT
DG1136g_A14229_DG1136N_A14244	2	90317001	90394000	77	0.482053	4	GAIN
DG1136g_A14229_DG1136N_A14244	2	90394001	90544000	150	0.025666	3	NEUT
DG1136g_A14229_DG1136N_A14244	2	90544001	91616000	1072	0.486942	4	GAIN
DG1136g_A14229_DG1136N_A14244	2	91616001	96543000	4927	0.096949	3	NEUT
DG1136g_A14229_DG1136N_A14244	2	96543001	96596000	53	0.319525	4	GAIN
DG1136g_A14229_DG1136N_A14244	2	96596001	97840000	1244	0.136645	3	NEUT
DG1136g_A14229_DG1136N_A14244	2	97840001	97885000	45	0.366341	4	GAIN
DG1136g_A14229_DG1136N_A14244	2	97885001	98151000	266	0.136912	3	NEUT
DG1136g_A14229_DG1136N_A14244	2	98151001	98178000	27	0.314483	4	GAIN
DG1136g_A14229_DG1136N_A14244	2	98178001	141997000	43819	0.084579	3	NEUT
DG1136g_A14229_DG1136N_A14244	2	141997001	142077000	80	-0.188258	2	HETD
DG1136g_A14229_DG1136N_A14244	2	142077001	212988000	70911	0.083097	3	NEUT
DG1136g_A14229_DG1136N_A14244	2	212988001	213000000	12	-0.460173	2	HETD
DG1136g_A14229_DG1136N_A14244	2	213000001	226723000	13723	0.106012	3	NEUT
DG1136g_A14229_DG1136N_A14244	2	226723001	232688000	5965	-0.363002	2	HETD
DG1136g_A14229_DG1136N_A14244	2	232688001	232715000	27	-0.944315	1	HOMD
DG1136g_A14229_DG1136N_A14244	2	232715001	242052000	9337	-0.344141	2	HETD
DG1136g_A14229_DG1136N_A14244	2	242052001	242066000	14	0.033924	3	NEUT
DG1136g_A14229_DG1136N_A14244	2	242066001	243200000	1134	-0.333419	2	HETD
DG1136g_A14229_DG1136N_A14244	3	1	15228000	15228	-0.324676	2	HETD
DG1136g_A14229_DG1136N_A14244	3	15228001	15243000	15	-0.025802	3	NEUT
DG1136g_A14229_DG1136N_A14244	3	15243001	53027000	37784	-0.329617	2	HETD
DG1136g_A14229_DG1136N_A14244	3	53027001	53038000	11	-1.21121	1	HOMD
DG1136g_A14229_DG1136N_A14244	3	53038001	61058000	8020	-0.375401	2	HETD
DG1136g_A14229_DG1136N_A14244	3	61058001	61718000	660	0.494344	4	GAIN
DG1136g_A14229_DG1136N_A14244	3	61718001	75776000	14058	0.10071	3	NEUT
DG1136g_A14229_DG1136N_A14244	3	75776001	75787000	11	-0.372947	2	HETD
DG1136g_A14229_DG1136N_A14244	3	75787001	115990000	40203	0.057814	3	NEUT
DG1136g_A14229_DG1136N_A14244	3	115990001	116169000	179	-0.402387	2	HETD
DG1136g_A14229_DG1136N_A14244	3	116169001	116273000	104	0.059776	3	NEUT
DG1136g_A14229_DG1136N_A14244	3	116273001	116371000	98	-0.406977	2	HETD
DG1136g_A14229_DG1136N_A14244	3	116371001	117373000	1002	0.050511	3	NEUT
DG1136g_A14229_DG1136N_A14244	3	117373001	117499000	126	-0.449447	2	HETD
DG1136g_A14229_DG1136N_A14244	3	117499001	167578000	50079	0.103128	3	NEUT
DG1136g_A14229_DG1136N_A14244	3	167578001	168403000	825	0.480532	4	GAIN
DG1136g_A14229_DG1136N_A14244	3	168403001	169856000	1453	0.532862	5	AMP
DG1136g_A14229_DG1136N_A14244	3	169856001	170109000	253	0.474291	4	GAIN
DG1136g_A14229_DG1136N_A14244	3	170109001	170551000	442	0.535052	5	AMP
DG1136g_A14229_DG1136N_A14244	3	170551001	170763000	212	0.476583	4	GAIN
DG1136g_A14229_DG1136N_A14244	3	170763001	170896000	133	0.548919	5	AMP
DG1136g_A14229_DG1136N_A14244	3	170896001	171091000	195	0.473397	4	GAIN
DG1136g_A14229_DG1136N_A14244	3	171091001	172473000	1382	0.524735	5	AMP
DG1136g_A14229_DG1136N_A14244	3	172473001	173441000	968	0.47644	4	GAIN
DG1136g_A14229_DG1136N_A14244	3	173441001	173490000	49	0.57196	5	AMP
DG1136g_A14229_DG1136N_A14244	3	173490001	175052000	1562	0.442079	4	GAIN
DG1136g_A14229_DG1136N_A14244	3	175052001	175198000	146	0.135148	3	NEUT
DG1136g_A14229_DG1136N_A14244	3	175198001	176790000	1592	0.459253	4	GAIN
DG1136g_A14229_DG1136N_A14244	3	176790001	177635000	845	0.525029	5	AMP
DG1136g_A14229_DG1136N_A14244	3	177635001	177959000	324	0.484026	4	GAIN
DG1136g_A14229_DG1136N_A14244	3	177959001	178082000	123	0.568746	5	AMP
DG1136g_A14229_DG1136N_A14244	3	178082001	182757000	4675	0.456515	4	GAIN
DG1136g_A14229_DG1136N_A14244	3	182757001	182948000	191	0.56665	5	AMP
DG1136g_A14229_DG1136N_A14244	3	182948001	183087000	139	0.467115	4	GAIN
DG1136g_A14229_DG1136N_A14244	3	183087001	185233000	2146	0.531171	5	AMP
DG1136g_A14229_DG1136N_A14244	3	185233001	185326000	93	0.422918	4	GAIN
DG1136g_A14229_DG1136N_A14244	3	185326001	186576000	1250	0.529693	5	AMP
DG1136g_A14229_DG1136N_A14244	3	186576001	186753000	177	0.47772	4	GAIN
DG1136g_A14229_DG1136N_A14244	3	186753001	187024000	271	0.546089	5	AMP
DG1136g_A14229_DG1136N_A14244	3	187024001	187160000	136	0.489094	4	GAIN
DG1136g_A14229_DG1136N_A14244	3	187160001	189069000	1909	0.540021	5	AMP
DG1136g_A14229_DG1136N_A14244	3	189069001	189651000	582	0.48554	4	GAIN
DG1136g_A14229_DG1136N_A14244	3	189651001	189827000	176	0.531683	5	AMP
DG1136g_A14229_DG1136N_A14244	3	189827001	195200000	5373	0.110615	3	NEUT
DG1136g_A14229_DG1136N_A14244	3	195200001	195236000	36	0.302478	4	GAIN
DG1136g_A14229_DG1136N_A14244	3	195236001	195499000	263	0.170394	3	NEUT
DG1136g_A14229_DG1136N_A14244	3	195499001	195520000	21	0.493009	4	GAIN
DG1136g_A14229_DG1136N_A14244	3	195520001	198023000	2503	0.13104	3	NEUT
DG1136g_A14229_DG1136N_A14244	4	1	21836000	21836	0.10271	3	NEUT
DG1136g_A14229_DG1136N_A14244	4	21836001	22122000	286	-0.39571	2	HETD
DG1136g_A14229_DG1136N_A14244	4	22122001	49093000	26971	0.058621	3	NEUT
DG1136g_A14229_DG1136N_A14244	4	49093001	49159000	66	0.347651	4	GAIN
DG1136g_A14229_DG1136N_A14244	4	49159001	49594000	435	0.014281	3	NEUT
DG1136g_A14229_DG1136N_A14244	4	49594001	49633000	39	-0.269721	2	HETD
DG1136g_A14229_DG1136N_A14244	4	49633001	74466000	24833	0.043961	3	NEUT
DG1136g_A14229_DG1136N_A14244	4	74466001	74661000	195	0.23231	4	GAIN
DG1136g_A14229_DG1136N_A14244	4	74661001	74769000	108	0.181832	3	NEUT
DG1136g_A14229_DG1136N_A14244	4	74769001	75954000	1185	0.233456	4	GAIN
DG1136g_A14229_DG1136N_A14244	4	75954001	76123000	169	0.197048	3	NEUT
DG1136g_A14229_DG1136N_A14244	4	76123001	76179000	56	0.295236	4	GAIN
DG1136g_A14229_DG1136N_A14244	4	76179001	76252000	73	0.163799	3	NEUT
DG1136g_A14229_DG1136N_A14244	4	76252001	76333000	81	0.3061	4	GAIN
DG1136g_A14229_DG1136N_A14244	4	76333001	76556000	223	0.191383	3	NEUT
DG1136g_A14229_DG1136N_A14244	4	76556001	76636000	80	0.234684	4	GAIN
DG1136g_A14229_DG1136N_A14244	4	76636001	76684000	48	0.169749	3	NEUT
DG1136g_A14229_DG1136N_A14244	4	76684001	77009000	325	0.251837	4	GAIN
DG1136g_A14229_DG1136N_A14244	4	77009001	77086000	77	0.146771	3	NEUT
DG1136g_A14229_DG1136N_A14244	4	77086001	77699000	613	0.261286	4	GAIN
DG1136g_A14229_DG1136N_A14244	4	77699001	77791000	92	0.1818	3	NEUT
DG1136g_A14229_DG1136N_A14244	4	77791001	78759000	968	0.258088	4	GAIN
DG1136g_A14229_DG1136N_A14244	4	78759001	79032000	273	0.177112	3	NEUT
DG1136g_A14229_DG1136N_A14244	4	79032001	79142000	110	0.256744	4	GAIN
DG1136g_A14229_DG1136N_A14244	4	79142001	79292000	150	0.178396	3	NEUT
DG1136g_A14229_DG1136N_A14244	4	79292001	79607000	315	0.238313	4	GAIN
DG1136g_A14229_DG1136N_A14244	4	79607001	79826000	219	0.188738	3	NEUT
DG1136g_A14229_DG1136N_A14244	4	79826001	79968000	142	0.251044	4	GAIN
DG1136g_A14229_DG1136N_A14244	4	79968001	130397000	50429	0.076095	3	NEUT
DG1136g_A14229_DG1136N_A14244	4	130397001	140552000	10155	-0.272881	2	HETD
DG1136g_A14229_DG1136N_A14244	4	140552001	140583000	31	-0.060881	3	NEUT
DG1136g_A14229_DG1136N_A14244	4	140583001	146284000	5701	-0.221125	2	HETD
DG1136g_A14229_DG1136N_A14244	4	146284001	146324000	40	-0.088123	3	NEUT
DG1136g_A14229_DG1136N_A14244	4	146324001	146917000	593	-0.231648	2	HETD
DG1136g_A14229_DG1136N_A14244	4	146917001	146929000	12	0.268227	3	NEUT
DG1136g_A14229_DG1136N_A14244	4	146929001	147264000	335	-0.225464	2	HETD
DG1136g_A14229_DG1136N_A14244	4	147264001	147283000	19	-0.085728	3	NEUT
DG1136g_A14229_DG1136N_A14244	4	147283001	147885000	602	-0.25121	2	HETD
DG1136g_A14229_DG1136N_A14244	4	147885001	151267000	3382	-0.048123	3	NEUT
DG1136g_A14229_DG1136N_A14244	4	151267001	151669000	402	-0.210001	2	HETD
DG1136g_A14229_DG1136N_A14244	4	151669001	162285000	10616	-0.055099	3	NEUT
DG1136g_A14229_DG1136N_A14244	4	162285001	162351000	66	-0.234444	2	HETD
DG1136g_A14229_DG1136N_A14244	4	162351001	162509000	158	-0.109742	3	NEUT
DG1136g_A14229_DG1136N_A14244	4	162509001	162595000	86	-0.181551	2	HETD
DG1136g_A14229_DG1136N_A14244	4	162595001	162777000	182	-0.140957	3	NEUT
DG1136g_A14229_DG1136N_A14244	4	162777001	162846000	69	-0.234357	2	HETD
DG1136g_A14229_DG1136N_A14244	4	162846001	163981000	1135	-0.111548	3	NEUT
DG1136g_A14229_DG1136N_A14244	4	163981001	164003000	22	-0.242974	2	HETD
DG1136g_A14229_DG1136N_A14244	4	164003001	171848000	7845	-0.065209	3	NEUT
DG1136g_A14229_DG1136N_A14244	4	171848001	171932000	84	-0.183441	2	HETD
DG1136g_A14229_DG1136N_A14244	4	171932001	172419000	487	-0.107779	3	NEUT
DG1136g_A14229_DG1136N_A14244	4	172419001	172454000	35	-0.22312	2	HETD
DG1136g_A14229_DG1136N_A14244	4	172454001	173236000	782	-0.117644	3	NEUT
DG1136g_A14229_DG1136N_A14244	4	173236001	173260000	24	-0.231788	2	HETD
DG1136g_A14229_DG1136N_A14244	4	173260001	178976000	5716	-0.095347	3	NEUT
DG1136g_A14229_DG1136N_A14244	4	178976001	178993000	17	-0.331589	2	HETD
DG1136g_A14229_DG1136N_A14244	4	178993001	179219000	226	-0.092084	3	NEUT
DG1136g_A14229_DG1136N_A14244	4	179219001	179356000	137	-0.185712	2	HETD
DG1136g_A14229_DG1136N_A14244	4	179356001	179639000	283	-0.144499	3	NEUT
DG1136g_A14229_DG1136N_A14244	4	179639001	179795000	156	-0.21282	2	HETD
DG1136g_A14229_DG1136N_A14244	4	179795001	179827000	32	-0.088768	3	NEUT
DG1136g_A14229_DG1136N_A14244	4	179827001	179873000	46	-0.21341	2	HETD
DG1136g_A14229_DG1136N_A14244	4	179873001	179913000	40	-0.053141	3	NEUT
DG1136g_A14229_DG1136N_A14244	4	179913001	179938000	25	-0.239281	2	HETD
DG1136g_A14229_DG1136N_A14244	4	179938001	180820000	882	-0.125937	3	NEUT
DG1136g_A14229_DG1136N_A14244	4	180820001	180871000	51	-0.215207	2	HETD
DG1136g_A14229_DG1136N_A14244	4	180871001	180960000	89	-0.081744	3	NEUT
DG1136g_A14229_DG1136N_A14244	4	180960001	180999000	39	-0.245088	2	HETD
DG1136g_A14229_DG1136N_A14244	4	180999001	181796000	797	-0.126973	3	NEUT
DG1136g_A14229_DG1136N_A14244	4	181796001	181854000	58	-0.206089	2	HETD
DG1136g_A14229_DG1136N_A14244	4	181854001	191155000	9301	-0.07394	3	NEUT
DG1136g_A14229_DG1136N_A14244	5	1	22505000	22505	0.054243	3	NEUT
DG1136g_A14229_DG1136N_A14244	5	22505001	36471000	13966	0.406937	4	GAIN
DG1136g_A14229_DG1136N_A14244	5	36471001	36533000	62	0.576931	5	AMP
DG1136g_A14229_DG1136N_A14244	5	36533001	40582000	4049	0.446649	4	GAIN
DG1136g_A14229_DG1136N_A14244	5	40582001	141206000	100624	0.085824	3	NEUT
DG1136g_A14229_DG1136N_A14244	5	141206001	141267000	61	0.258253	4	GAIN
DG1136g_A14229_DG1136N_A14244	5	141267001	142041000	774	0.134973	3	NEUT
DG1136g_A14229_DG1136N_A14244	5	142041001	142124000	83	0.493906	4	GAIN
DG1136g_A14229_DG1136N_A14244	5	142124001	178977000	36853	0.107152	3	NEUT
DG1136g_A14229_DG1136N_A14244	5	178977001	180875000	1898	-0.326666	2	HETD
DG1136g_A14229_DG1136N_A14244	5	180875001	180896000	21	-0.001255	3	NEUT
DG1136g_A14229_DG1136N_A14244	5	180896001	180916000	20	-0.265	2	HETD
DG1136g_A14229_DG1136N_A14244	6	1	34421000	34421	0.069288	3	NEUT
DG1136g_A14229_DG1136N_A14244	6	34421001	34630000	209	0.721883	5	AMP
DG1136g_A14229_DG1136N_A14244	6	34630001	57823000	23193	0.085678	3	NEUT
DG1136g_A14229_DG1136N_A14244	6	57823001	58086000	263	0.346049	4	GAIN
DG1136g_A14229_DG1136N_A14244	6	58086001	61926000	3840	0.077428	3	NEUT
DG1136g_A14229_DG1136N_A14244	6	61926001	66716000	4790	0.30773	4	GAIN
DG1136g_A14229_DG1136N_A14244	6	66716001	66752000	36	0.127328	3	NEUT
DG1136g_A14229_DG1136N_A14244	6	66752001	68011000	1259	0.285676	4	GAIN
DG1136g_A14229_DG1136N_A14244	6	68011001	68047000	36	0.124292	3	NEUT
DG1136g_A14229_DG1136N_A14244	6	68047001	135123000	67076	0.381889	4	GAIN
DG1136g_A14229_DG1136N_A14244	6	135123001	170939000	35816	-0.362789	2	HETD
DG1136g_A14229_DG1136N_A14244	6	170939001	170989000	50	0.012388	3	NEUT
DG1136g_A14229_DG1136N_A14244	6	170989001	171116000	127	-0.266956	2	HETD
DG1136g_A14229_DG1136N_A14244	7	1	74000	74	-0.115784	3	NEUT
DG1136g_A14229_DG1136N_A14244	7	74001	4623000	4549	-0.380956	2	HETD
DG1136g_A14229_DG1136N_A14244	7	4623001	4639000	16	0.13394	3	NEUT
DG1136g_A14229_DG1136N_A14244	7	4639001	5959000	1320	-0.377705	2	HETD
DG1136g_A14229_DG1136N_A14244	7	5959001	5992000	33	-0.071238	3	NEUT
DG1136g_A14229_DG1136N_A14244	7	5992001	6195000	203	-0.380701	2	HETD
DG1136g_A14229_DG1136N_A14244	7	6195001	17151000	10956	0.053713	3	NEUT
DG1136g_A14229_DG1136N_A14244	7	17151001	17171000	20	-0.368348	2	HETD
DG1136g_A14229_DG1136N_A14244	7	17171001	38292000	21121	0.102923	3	NEUT
DG1136g_A14229_DG1136N_A14244	7	38292001	38401000	109	0.296836	4	GAIN
DG1136g_A14229_DG1136N_A14244	7	38401001	57546000	19145	0.082836	3	NEUT
DG1136g_A14229_DG1136N_A14244	7	57546001	57557000	11	0.474172	4	GAIN
DG1136g_A14229_DG1136N_A14244	7	57557001	61740000	4183	-0.031321	3	NEUT
DG1136g_A14229_DG1136N_A14244	7	61740001	61759000	19	0.423426	4	GAIN
DG1136g_A14229_DG1136N_A14244	7	61759001	61780000	21	0.023291	3	NEUT
DG1136g_A14229_DG1136N_A14244	7	61780001	61803000	23	0.385089	4	GAIN
DG1136g_A14229_DG1136N_A14244	7	61803001	73583000	11780	0.090612	3	NEUT
DG1136g_A14229_DG1136N_A14244	7	73583001	73638000	55	0.288959	4	GAIN
DG1136g_A14229_DG1136N_A14244	7	73638001	142330000	68692	0.084627	3	NEUT
DG1136g_A14229_DG1136N_A14244	7	142330001	142494000	164	0.293006	4	GAIN
DG1136g_A14229_DG1136N_A14244	7	142494001	144391000	1897	-0.060169	3	NEUT
DG1136g_A14229_DG1136N_A14244	7	144391001	144449000	58	-0.199494	2	HETD
DG1136g_A14229_DG1136N_A14244	7	144449001	144637000	188	-0.111645	3	NEUT
DG1136g_A14229_DG1136N_A14244	7	144637001	144810000	173	-0.194278	2	HETD
DG1136g_A14229_DG1136N_A14244	7	144810001	144900000	90	-0.115766	3	NEUT
DG1136g_A14229_DG1136N_A14244	7	144900001	144987000	87	-0.217382	2	HETD
DG1136g_A14229_DG1136N_A14244	7	144987001	145065000	78	-0.086216	3	NEUT
DG1136g_A14229_DG1136N_A14244	7	145065001	145110000	45	-0.218628	2	HETD
DG1136g_A14229_DG1136N_A14244	7	145110001	145179000	69	-0.119289	3	NEUT
DG1136g_A14229_DG1136N_A14244	7	145179001	145497000	318	-0.19654	2	HETD
DG1136g_A14229_DG1136N_A14244	7	145497001	146055000	558	-0.145958	3	NEUT
DG1136g_A14229_DG1136N_A14244	7	146055001	146293000	238	-0.183025	2	HETD
DG1136g_A14229_DG1136N_A14244	7	146293001	146344000	51	-0.094203	3	NEUT
DG1136g_A14229_DG1136N_A14244	7	146344001	146373000	29	-0.279513	2	HETD
DG1136g_A14229_DG1136N_A14244	7	146373001	146521000	148	-0.1254	3	NEUT
DG1136g_A14229_DG1136N_A14244	7	146521001	146584000	63	-0.201318	2	HETD
DG1136g_A14229_DG1136N_A14244	7	146584001	146634000	50	-0.095557	3	NEUT
DG1136g_A14229_DG1136N_A14244	7	146634001	146752000	118	-0.198182	2	HETD
DG1136g_A14229_DG1136N_A14244	7	146752001	146875000	123	-0.121527	3	NEUT
DG1136g_A14229_DG1136N_A14244	7	146875001	146981000	106	-0.204308	2	HETD
DG1136g_A14229_DG1136N_A14244	7	146981001	147625000	644	-0.134462	3	NEUT
DG1136g_A14229_DG1136N_A14244	7	147625001	147675000	50	-0.198106	2	HETD
DG1136g_A14229_DG1136N_A14244	7	147675001	152083000	4408	-0.060486	3	NEUT
DG1136g_A14229_DG1136N_A14244	7	152083001	152116000	33	-0.277416	2	HETD
DG1136g_A14229_DG1136N_A14244	7	152116001	152148000	32	-0.028138	3	NEUT
DG1136g_A14229_DG1136N_A14244	7	152148001	152165000	17	-0.298158	2	HETD
DG1136g_A14229_DG1136N_A14244	7	152165001	159139000	6974	-0.021445	3	NEUT
DG1136g_A14229_DG1136N_A14244	X	1	2175000	2175	0.153884	3	NEUT
DG1136g_A14229_DG1136N_A14244	X	2175001	2411000	236	0.240665	4	GAIN
DG1136g_A14229_DG1136N_A14244	X	2411001	30806000	28395	0.094181	3	NEUT
DG1136g_A14229_DG1136N_A14244	X	30806001	30825000	19	0.351397	4	GAIN
DG1136g_A14229_DG1136N_A14244	X	30825001	39327000	8502	0.074977	3	NEUT
DG1136g_A14229_DG1136N_A14244	X	39327001	49205000	9878	-0.365588	2	HETD
DG1136g_A14229_DG1136N_A14244	X	49205001	49366000	161	-0.118167	3	NEUT
DG1136g_A14229_DG1136N_A14244	X	49366001	52818000	3452	-0.344197	2	HETD
DG1136g_A14229_DG1136N_A14244	X	52818001	58567000	5749	0.061064	3	NEUT
DG1136g_A14229_DG1136N_A14244	X	58567001	61724000	3157	0.251408	4	GAIN
DG1136g_A14229_DG1136N_A14244	X	61724001	155271000	93547	0.038375	3	NEUT
DG1136g_A14229_DG1136N_A14244	8	1	157000	157	-0.060555	3	NEUT
DG1136g_A14229_DG1136N_A14244	8	157001	6829000	6672	-0.423635	2	HETD
DG1136g_A14229_DG1136N_A14244	8	6829001	6852000	23	-0.046943	3	NEUT
DG1136g_A14229_DG1136N_A14244	8	6852001	7118000	266	-0.311658	2	HETD
DG1136g_A14229_DG1136N_A14244	8	7118001	7153000	35	0.000563	3	NEUT
DG1136g_A14229_DG1136N_A14244	8	7153001	7229000	76	-0.445508	2	HETD
DG1136g_A14229_DG1136N_A14244	8	7229001	7461000	232	-0.047664	3	NEUT
DG1136g_A14229_DG1136N_A14244	8	7461001	7576000	115	-0.204907	2	HETD
DG1136g_A14229_DG1136N_A14244	8	7576001	7926000	350	-0.063226	3	NEUT
DG1136g_A14229_DG1136N_A14244	8	7926001	7984000	58	-0.43232	2	HETD
DG1136g_A14229_DG1136N_A14244	8	7984001	8012000	28	-0.070552	3	NEUT
DG1136g_A14229_DG1136N_A14244	8	8012001	11959000	3947	-0.376101	2	HETD
DG1136g_A14229_DG1136N_A14244	8	11959001	12089000	130	-0.065344	3	NEUT
DG1136g_A14229_DG1136N_A14244	8	12089001	12198000	109	-0.404322	2	HETD
DG1136g_A14229_DG1136N_A14244	8	12198001	12332000	134	-0.036211	3	NEUT
DG1136g_A14229_DG1136N_A14244	8	12332001	12350000	18	-0.317112	2	HETD
DG1136g_A14229_DG1136N_A14244	8	12350001	12467000	117	-0.137262	3	NEUT
DG1136g_A14229_DG1136N_A14244	8	12467001	33886000	21419	-0.403515	2	HETD
DG1136g_A14229_DG1136N_A14244	8	33886001	33899000	13	-0.980176	1	HOMD
DG1136g_A14229_DG1136N_A14244	8	33899001	37716000	3817	-0.427191	2	HETD
DG1136g_A14229_DG1136N_A14244	8	37716001	57000000	19284	0.050582	3	NEUT
DG1136g_A14229_DG1136N_A14244	8	57000001	57012000	12	-0.500825	2	HETD
DG1136g_A14229_DG1136N_A14244	8	57012001	90026000	33014	0.054108	3	NEUT
DG1136g_A14229_DG1136N_A14244	8	90026001	90084000	58	-0.374995	2	HETD
DG1136g_A14229_DG1136N_A14244	8	90084001	97044000	6960	0.059471	3	NEUT
DG1136g_A14229_DG1136N_A14244	8	97044001	102258000	5214	0.72117	5	AMP
DG1136g_A14229_DG1136N_A14244	8	102258001	102409000	151	0.951335	6	HLAMP
DG1136g_A14229_DG1136N_A14244	8	102409001	142274000	39865	0.692081	5	AMP
DG1136g_A14229_DG1136N_A14244	8	142274001	142447000	173	1.02321	6	HLAMP
DG1136g_A14229_DG1136N_A14244	8	142447001	146365000	3918	0.758393	5	AMP
[truncated: 817 more rows]

## Sheet: b) DG1136 APOLLOH_segments
Sample	Chromosome	Start Position(bp)	End Position(bp)	Length(Mb)	Median_Ratio	State	APOLLOH_call	MinorCN	MajorCN
DG1136a	1	10109	727962	717854	0.7083	2	NLOH	0	2
DG1136a	1	729679	764191	34513	0.5806	3	HET	1	1
DG1136a	1	765887	826194	60308	0.6944	2	NLOH	0	2
DG1136a	1	826214	1649105	822892	0.5833	3	HET	1	1
DG1136a	1	1649137	1661844	12708	0.7105	2	NLOH	0	2
DG1136a	1	1663402	1910236	246835	0.5714	3	HET	1	1
DG1136a	1	1910371	1911246	876	0.8695	4	NLOH	0	2
DG1136a	1	1911872	2369498	457627	0.5789	3	HET	1	1
DG1136a	1	2371998	2372140	143	0.7895	4	NLOH	0	2
DG1136a	1	2372320	2582060	209741	0.5903	3	HET	1	1
DG1136a	1	2583469	2690153	106685	0.7136	4	NLOH	0	2
DG1136a	1	2691819	2941425	249607	0.5758	3	HET	1	1
DG1136a	1	2942466	2942820	355	0.7438	2	NLOH	0	2
DG1136a	1	2946726	4391733	1445008	0.5769	3	HET	1	1
DG1136a	1	4391820	4393428	1609	0.7353	2	NLOH	0	2
DG1136a	1	4394304	4999550	605247	0.5714	3	HET	1	1
DG1136a	1	4999608	4999700	93	0.7192	2	NLOH	0	2
DG1136a	1	5001809	5726391	724583	0.5667	3	HET	1	1
DG1136a	1	5726874	5736123	9250	0.7	2	NLOH	0	2
DG1136a	1	5736682	5862935	126254	0.5646	3	HET	1	1
DG1136a	1	5862937	5889904	26968	0.7619	4	NLOH	0	2
DG1136a	1	5889918	8404093	2514176	0.5667	3	HET	1	1
DG1136a	1	8404873	8405006	134	0.7041	2	NLOH	0	2
DG1136a	1	8405690	11025493	2619804	0.5663	3	HET	1	1
DG1136a	1	11030929	11031193	265	0.7793	2	NLOH	0	2
DG1136a	1	11031607	12844039	1812433	0.5714	3	HET	1	1
DG1136a	1	12844306	12849033	4728	0.72	4	NLOH	0	2
DG1136a	1	12849046	12889792	40747	0.5714	3	HET	1	1
DG1136a	1	12890289	12893764	3476	0.7188	2	NLOH	0	2
DG1136a	1	12893871	12900997	7127	0.5642	3	HET	1	1
DG1136a	1	12907781	12937814	30034	0.7308	2	NLOH	0	2
DG1136a	1	12938151	12942306	4156	0.5897	3	HET	1	1
DG1136a	1	12942399	12946904	4506	0.6829	2	NLOH	0	2
DG1136a	1	12948098	13052907	104810	0.6111	3	HET	1	1
DG1136a	1	13132530	13178921	46392	0.6957	2	NLOH	0	2
DG1136a	1	13178930	13179681	752	0.5517	3	HET	1	1
DG1136a	1	13180351	13183071	2721	0.6667	2	NLOH	0	2
DG1136a	1	13183115	13183213	99	0.5391	3	HET	1	1
DG1136a	1	13183439	13187513	4075	0.7591	2	NLOH	0	2
DG1136a	1	13187577	13189595	2019	0.5735	3	HET	1	1
DG1136a	1	13202578	13218125	15548	0.7368	4	NLOH	0	2
DG1136a	1	13327683	13795797	468115	0.5664	3	HET	1	1
DG1136a	1	13796607	13796794	188	0.7885	2	NLOH	0	2
DG1136a	1	13796922	14796605	999684	0.5633	3	HET	1	1
DG1136a	1	14804770	14839485	34716	0.7655	2	NLOH	0	2
DG1136a	1	14841189	16383267	1542079	0.5652	3	HET	1	1
DG1136a	1	16383448	16384801	1354	0.7773	4	NLOH	0	2
DG1136a	1	16384868	16833763	448896	0.5789	3	HET	1	1
DG1136a	1	16833787	16843590	9804	0.6993	2	NLOH	0	2
DG1136a	1	16844848	16860346	15499	0.625	3	HET	1	1
DG1136a	1	16860633	16913852	53220	0.674	4	NLOH	0	2
DG1136a	1	16914252	16919253	5002	0.5926	3	HET	1	1
DG1136a	1	16919273	16924791	5519	0.7033	2	NLOH	0	2
DG1136a	1	16924941	16926980	2040	0.5566	3	HET	1	1
DG1136a	1	16927039	16961058	34020	0.7308	2	NLOH	0	2
DG1136a	1	16961114	16963769	2656	0.5656	3	HET	1	1
DG1136a	1	16963907	16965811	1905	0.6704	2	NLOH	0	2
DG1136a	1	16966132	16970165	4034	0.6071	3	HET	1	1
DG1136a	1	16970757	17001880	31124	0.7294	2	NLOH	0	2
DG1136a	1	17002323	17006446	4124	0.566	3	HET	1	1
DG1136a	1	17006787	17052153	45367	0.6786	2	NLOH	0	2
DG1136a	1	17052304	17052433	130	0.5495	3	HET	1	1
DG1136a	1	17052518	17200127	147610	0.6923	2	NLOH	0	2
DG1136a	1	17200270	17201024	755	0.5211	3	HET	1	1
DG1136a	1	17201080	17201674	595	0.7143	4	NLOH	0	2
DG1136a	1	17201775	17203786	2012	0.5854	3	HET	1	1
DG1136a	1	17203878	17234672	30795	0.6838	2	NLOH	0	2
DG1136a	1	17234726	17615143	380418	0.5714	3	HET	1	1
DG1136a	1	17615546	17615798	253	0.8205	2	NLOH	0	2
DG1136a	1	17616132	19359756	1743625	0.5667	3	HET	1	1
DG1136a	1	19387849	19450847	62999	0.7307	2	NLOH	0	2
DG1136a	1	19469757	22279260	2809504	0.5676	3	HET	1	1
DG1136a	1	22310084	22342272	32189	0.7182	2	NLOH	0	2
DG1136a	1	22346184	25835495	3489312	0.5667	3	HET	1	1
DG1136a	1	25855784	25855907	124	0.785	2	NLOH	0	2
DG1136a	1	25877573	28197454	2319882	0.5714	3	HET	1	1
DG1136a	1	28204872	28204975	104	0.7087	2	NLOH	0	2
DG1136a	1	28207887	31901035	3693149	0.5652	3	HET	1	1
DG1136a	1	31904607	31906089	1483	0.7616	4	NLOH	0	2
DG1136a	1	31942716	33106756	1164041	0.5667	3	HET	1	1
DG1136a	1	33107495	33108554	1060	0.7917	2	NLOH	0	2
DG1136a	1	33108852	46134566	13025715	0.5652	3	HET	1	1
DG1136a	1	46168813	46168901	89	0.8182	2	NLOH	0	2
DG1136a	1	46168953	53087223	6918271	0.5641	3	HET	1	1
DG1136a	1	53089250	53089344	95	0.8333	2	NLOH	0	2
DG1136a	1	53090345	54192432	1102088	0.5652	3	HET	1	1
DG1136a	1	54311787	54368670	56884	0.8899	2	NLOH	0	2
DG1136a	1	54382860	83822713	29439854	0.5614	3	HET	1	1
DG1136a	1	83822927	83824629	1703	0.7471	2	NLOH	0	2
DG1136a	1	83825017	91371299	7546283	0.56	3	HET	1	1
DG1136a	1	91372079	91375162	3084	0.5938	3	HET	1	1
DG1136a	1	91377873	91448883	71011	0.7586	1	DLOH	0	1
DG1136a	1	91453429	91633695	180267	0.5617	3	HET	1	1
DG1136a	1	91634126	91635026	901	0.75	2	NLOH	0	2
DG1136a	1	91635414	117146841	25511428	0.5625	3	HET	1	1
DG1136a	1	117166864	117185172	18309	0.7614	2	NLOH	0	2
DG1136a	1	117186009	120364352	3178344	0.56	3	HET	1	1
DG1136a	1	120391924	120391986	63	0.8444	2	NLOH	0	2
DG1136a	1	120405231	120521065	115835	0.5357	3	HET	1	1
DG1136a	1	120532569	120695867	163299	0.6898	2	NLOH	0	2
DG1136a	1	120695911	120766193	70283	0.5918	3	HET	1	1
DG1136a	1	120766792	121112763	345972	0.75	2	NLOH	0	2
DG1136a	1	121113600	121133574	19975	0.6176	3	HET	1	1
DG1136a	1	121133698	121144821	11124	0.7021	2	NLOH	0	2
DG1136a	1	121159294	121352072	192779	0.5833	3	HET	1	1
DG1136a	1	121352075	121355152	3078	0.6653	4	NLOH	0	2
DG1136a	1	121355289	121355399	111	0.528	3	HET	1	1
DG1136a	1	121355468	121357841	2374	0.6773	4	NLOH	0	2
DG1136a	1	121357913	121358169	257	0.5468	3	HET	1	1
DG1136a	1	121358177	121483995	125819	0.6771	4	NLOH	0	2
DG1136a	1	142535439	142535578	140	0.5798	3	HET	1	1
DG1136a	1	142535606	142536734	1129	0.7001	2	NLOH	0	2
DG1136a	1	142536775	142537087	313	0.6087	3	HET	1	1
DG1136a	1	142537140	142539860	2721	0.6767	4	NLOH	0	2
DG1136a	1	142539864	142539930	67	0.5588	3	HET	1	1
DG1136a	1	142540082	142585787	45706	0.75	2	NLOH	0	2
DG1136a	1	142585845	142587439	1595	0.6	3	HET	1	1
DG1136a	1	142587598	142789879	202282	0.7179	4	NLOH	0	2
DG1136a	1	142790005	142797359	7355	0.7159	1	DLOH	0	1
DG1136a	1	142797892	142802102	4211	0.567	3	HET	1	1
DG1136a	1	142802230	142802875	646	0.7881	1	DLOH	0	1
DG1136a	1	142802934	142834421	31488	0.5844	3	HET	1	1
DG1136a	1	142837243	143145107	307865	0.74	1	DLOH	0	1
DG1136a	1	143145173	143146823	1651	0.5789	3	HET	1	1
DG1136a	1	143147026	143150725	3700	0.5833	3	HET	1	1
DG1136a	1	143150891	143362424	211534	0.75	2	NLOH	0	2
DG1136a	1	143370532	143536926	166395	0.8056	1	DLOH	0	1
DG1136a	1	143537210	143537700	491	0.5585	3	HET	1	1
DG1136a	1	143537789	143539713	1925	0.8394	1	DLOH	0	1
DG1136a	1	143539733	143540808	1076	0.5778	3	HET	1	1
DG1136a	1	143540854	143540954	101	0.8444	1	DLOH	0	1
DG1136a	1	143541096	143984189	443094	0.7154	2	NLOH	0	2
DG1136a	1	143984543	143995195	10653	0.5606	3	HET	1	1
DG1136a	1	143995281	144042919	47639	0.6757	2	NLOH	0	2
DG1136a	1	144043777	144526611	482835	0.5946	3	HET	1	1
DG1136a	1	144526632	144585620	58989	0.7345	2	NLOH	0	2
DG1136a	1	144586088	144595666	9579	0.6	3	HET	1	1
DG1136a	1	144595670	144602049	6380	0.6857	4	NLOH	0	2
DG1136a	1	144602797	144615237	12441	0.6333	3	HET	1	1
DG1136a	1	144618070	144676216	58147	0.7657	4	NLOH	0	2
DG1136a	1	144678871	144682161	3291	0.5887	3	HET	1	1
DG1136a	1	144682709	144838866	156158	0.6667	2	NLOH	0	2
DG1136a	1	144839031	144842392	3362	0.5926	3	HET	1	1
DG1136a	1	144842543	144844469	1927	0.6962	2	NLOH	0	2
DG1136a	1	144844575	144846785	2211	0.5556	3	HET	1	1
DG1136a	1	144847017	144849161	2145	0.7424	2	NLOH	0	2
DG1136a	1	144849377	144852254	2878	0.5477	3	HET	1	1
DG1136a	1	144852315	144854277	1963	0.6464	4	NLOH	0	2
DG1136a	1	144854380	144860860	6481	0.5862	3	HET	1	1
DG1136a	1	144860862	144860937	76	0.7647	4	NLOH	0	2
DG1136a	1	144861194	144952220	91027	0.5493	3	HET	1	1
DG1136a	1	144952255	144985050	32796	0.7	2	NLOH	0	2
DG1136a	1	144986081	144986827	747	0.5151	3	HET	1	1
DG1136a	1	144987060	144987720	661	0.8032	4	NLOH	0	2
DG1136a	1	144987993	144989929	1937	0.5574	3	HET	1	1
DG1136a	1	144990002	144990491	490	0.7211	2	NLOH	0	2
DG1136a	1	144990684	144992578	1895	0.5383	3	HET	1	1
DG1136a	1	144992632	144995559	2928	0.7133	2	NLOH	0	2
DG1136a	1	144995618	144996533	916	0.5552	3	HET	1	1
DG1136a	1	144996796	144997905	1110	0.7407	4	NLOH	0	2
DG1136a	1	144998092	144999134	1043	0.52	3	HET	1	1
DG1136a	1	144999201	145001649	2449	0.7474	2	NLOH	0	2
DG1136a	1	145001818	145001974	157	0.546	3	HET	1	1
DG1136a	1	145002037	145002798	762	0.7321	2	NLOH	0	2
DG1136a	1	145003209	145003838	630	0.5472	3	HET	1	1
DG1136a	1	145003894	145007519	3626	0.7081	2	NLOH	0	2
DG1136a	1	145007525	145008217	693	0.5045	3	HET	1	1
DG1136a	1	145008307	145008625	319	0.7876	2	NLOH	0	2
DG1136a	1	145009542	145013562	4021	0.5255	3	HET	1	1
DG1136a	1	145013634	145014096	463	0.7792	2	NLOH	0	2
DG1136a	1	145014103	145014718	616	0.5714	3	HET	1	1
DG1136a	1	145014729	145016419	1691	0.7147	2	NLOH	0	2
DG1136a	1	145016535	145018788	2254	0.5627	3	HET	1	1
DG1136a	1	145018806	145020039	1234	0.7184	4	NLOH	0	2
DG1136a	1	145020126	145024880	4755	0.5451	3	HET	1	1
DG1136a	1	145025088	145028119	3032	0.7017	2	NLOH	0	2
DG1136a	1	145028149	145038952	10804	0.5644	3	HET	1	1
DG1136a	1	145039026	145039831	806	0.7778	2	NLOH	0	2
DG1136a	1	145039866	145041961	2096	0.5385	3	HET	1	1
DG1136a	1	145042060	145042768	709	0.75	2	NLOH	0	2
DG1136a	1	145042812	145045565	2754	0.5696	3	HET	1	1
DG1136a	1	145045678	145047627	1950	0.75	2	NLOH	0	2
DG1136a	1	145047938	145050528	2591	0.5841	3	HET	1	1
DG1136a	1	145051033	145055586	4554	0.7413	2	NLOH	0	2
DG1136a	1	145055592	145056694	1103	0.5714	3	HET	1	1
DG1136a	1	145056717	145058302	1586	0.7289	4	NLOH	0	2
DG1136a	1	145058732	145059748	1017	0.52	3	HET	1	1
DG1136a	1	145059932	145060456	525	0.7388	2	NLOH	0	2
DG1136a	1	145060495	145062386	1892	0.5393	3	HET	1	1
DG1136a	1	145062476	145064414	1939	0.7302	2	NLOH	0	2
DG1136a	1	145064892	145065720	829	0.5087	3	HET	1	1
DG1136a	1	145066323	145066389	67	0.8436	4	NLOH	0	2
DG1136a	1	145066727	145068183	1457	0.5283	3	HET	1	1
DG1136a	1	145068726	145069070	345	0.7967	2	NLOH	0	2
DG1136a	1	145069346	145070221	876	0.5329	3	HET	1	1
DG1136a	1	145070241	145071008	768	0.8	2	NLOH	0	2
DG1136a	1	145071259	145071624	366	0.5306	3	HET	1	1
DG1136a	1	145072183	145130464	58282	0.687	2	NLOH	0	2
DG1136a	1	145130535	145140034	9500	0.5817	3	HET	1	1
DG1136a	1	145140533	145377105	236573	0.7117	2	NLOH	0	2
DG1136a	1	145377272	145380176	2905	0.5844	3	HET	1	1
DG1136a	1	145380393	145381187	795	0.7332	2	NLOH	0	2
DG1136a	1	145381460	146020111	638652	0.5763	3	HET	1	1
DG1136a	1	146021102	146493675	472574	0.7027	2	NLOH	0	2
DG1136a	1	146494246	147379367	885122	0.56	3	HET	1	1
DG1136a	1	147389875	147393417	3543	0.6721	2	NLOH	0	2
DG1136a	1	147393535	147935096	541562	0.6	3	HET	1	1
DG1136a	1	147999280	148889082	889803	0.6955	2	NLOH	0	2
DG1136a	1	148889345	148894063	4719	0.547	3	HET	1	1
DG1136a	1	148894167	148951063	56897	0.6667	2	NLOH	0	2
DG1136a	1	148951075	149029398	78324	0.5973	3	HET	1	1
DG1136a	1	149029436	149225770	196335	0.7015	2	NLOH	0	2
DG1136a	1	149225819	149227440	1622	0.6071	3	HET	1	1
DG1136a	1	149227576	149245079	17504	0.661	4	NLOH	0	2
DG1136a	1	149245515	149269433	23919	0.6164	3	HET	1	1
DG1136a	1	149269809	149339165	69357	0.6667	4	NLOH	0	2
DG1136a	1	149339222	149655498	316277	0.6267	3	HET	1	1
DG1136a	1	149655609	149702670	47062	0.6895	4	NLOH	0	2
DG1136a	1	149706610	158955561	9248952	0.5652	3	HET	1	1
DG1136a	1	158962344	158962523	180	0.7538	2	NLOH	0	2
DG1136a	1	158962549	160639451	1676903	0.5625	3	HET	1	1
DG1136a	1	160646561	160667343	20783	0.8086	2	NLOH	0	2
DG1136a	1	160682013	161484564	802552	0.5714	3	HET	1	1
DG1136a	1	161495477	161559893	64417	0.6667	4	NLOH	0	2
DG1136a	1	161561151	201178788	39617638	0.5625	3	HET	1	1
DG1136a	1	201178904	201181217	2314	0.7368	2	NLOH	0	2
DG1136a	1	201181920	204657970	3476051	0.5676	3	HET	1	1
DG1136a	1	204665930	204667418	1489	0.9565	2	NLOH	0	2
DG1136a	1	204702252	206496239	1793988	0.5667	3	HET	1	1
DG1136a	1	206496442	206537230	40789	0.6667	2	NLOH	0	2
DG1136a	1	206543785	207095551	551767	0.575	3	HET	1	1
DG1136a	1	207097322	207098048	727	0.7377	2	NLOH	0	2
DG1136a	1	207100588	210826979	3726392	0.5625	3	HET	1	1
DG1136a	1	210827247	210827482	236	0.6744	2	NLOH	0	2
DG1136a	1	210829448	214652650	3823203	0.5641	3	HET	1	1
DG1136a	1	214656164	214656697	534	0.7143	2	NLOH	0	2
DG1136a	1	214658211	220077457	5419247	0.5625	3	HET	1	1
DG1136a	1	220077580	220077810	231	0.8235	2	NLOH	0	2
DG1136a	1	220078188	224049075	3970888	0.5667	3	HET	1	1
DG1136a	1	224069384	224201645	132262	0.6897	2	NLOH	0	2
DG1136a	1	224201819	224202080	262	0.5484	3	HET	1	1
DG1136a	1	224202211	224217134	14924	0.7381	4	NLOH	0	2
DG1136a	1	224226372	234909298	10682927	0.5625	3	HET	1	1
DG1136a	1	234912314	234918608	6295	0.6813	2	NLOH	0	2
DG1136a	1	234919118	236631091	1711974	0.566	3	HET	1	1
DG1136a	1	236656826	236661515	4690	0.7735	4	NLOH	0	2
DG1136a	1	236668555	242451428	5782874	0.5652	3	HET	1	1
DG1136a	1	242458409	242484997	26589	0.789	2	NLOH	0	2
DG1136a	1	242490329	243080972	590644	0.56	3	HET	1	1
DG1136a	1	243153848	243333027	179180	0.7536	2	NLOH	0	2
DG1136a	1	243350020	248590000	5239981	0.5667	3	HET	1	1
DG1136a	1	248595346	248665154	69809	0.6742	4	NLOH	0	2
DG1136a	1	248667167	248691591	24425	0.5714	3	HET	1	1
DG1136a	1	248701084	248819770	118687	0.6802	2	NLOH	0	2
DG1136a	1	248819871	249230585	410715	0.5714	3	HET	1	1
DG1136a	1	249232463	249240547	8085	0.8182	2	NLOH	0	2
DG1136a	2	11834	845244	833411	0.5714	3	HET	1	1
DG1136a	2	845337	846057	721	0.771	2	NLOH	0	2
DG1136a	2	846164	1089666	243503	0.5652	3	HET	1	1
DG1136a	2	1095275	1112723	17449	0.7	2	NLOH	0	2
DG1136a	2	1115131	1524953	409823	0.5682	3	HET	1	1
DG1136a	2	1530333	1536902	6570	0.7692	2	NLOH	0	2
DG1136a	2	1538125	1584388	46264	0.5714	3	HET	1	1
DG1136a	2	1584508	1585322	815	0.8696	2	NLOH	0	2
DG1136a	2	1585829	1863005	277177	0.5789	3	HET	1	1
DG1136a	2	1863363	1865745	2383	0.6977	2	NLOH	0	2
DG1136a	2	1874163	3049147	1174985	0.5641	3	HET	1	1
DG1136a	2	3049820	3061759	11940	0.6886	2	NLOH	0	2
DG1136a	2	3061901	3184222	122322	0.5714	3	HET	1	1
DG1136a	2	3184239	3185183	945	0.7027	2	NLOH	0	2
DG1136a	2	3185321	5698876	2513556	0.5625	3	HET	1	1
DG1136a	2	5704328	5780371	76044	0.7238	2	NLOH	0	2
DG1136a	2	5815111	11092880	5277770	0.5636	3	HET	1	1
DG1136a	2	11093843	11094263	421	0.7864	4	NLOH	0	2
DG1136a	2	11096599	12288165	1191567	0.5652	3	HET	1	1
DG1136a	2	12293403	12355870	62468	0.8148	2	NLOH	0	2
DG1136a	2	12378587	19983183	7604597	0.5625	3	HET	1	1
DG1136a	2	19983951	19984095	145	0.7286	2	NLOH	0	2
DG1136a	2	19984546	37957480	17972935	0.5625	3	HET	1	1
DG1136a	2	37958452	38002829	44378	0.8864	2	NLOH	0	2
DG1136a	2	38008339	41599315	3590977	0.56	3	HET	1	1
DG1136a	2	41606076	41606716	641	0.8108	2	NLOH	0	2
DG1136a	2	41610190	51387491	9777302	0.561	3	HET	1	1
DG1136a	2	51387654	51387753	100	0.8065	2	NLOH	0	2
DG1136a	2	51388244	60051642	8663399	0.561	3	HET	1	1
DG1136a	2	60079697	60080848	1152	0.8135	2	NLOH	0	2
DG1136a	2	60093574	63801993	3708420	0.5625	3	HET	1	1
DG1136a	2	63802523	63802651	129	0.7042	4	NLOH	0	2
DG1136a	2	63802668	64617739	815072	0.5656	3	HET	1	1
DG1136a	2	64618384	64672218	53835	0.5594	6	HET	1	2
DG1136a	2	64674647	71798435	7123789	0.5625	3	HET	1	1
DG1136a	2	71798590	71799385	796	0.8475	4	NLOH	0	2
DG1136a	2	71799647	71996034	196388	0.5625	3	HET	1	1
DG1136a	2	71996084	71997322	1239	0.741	2	NLOH	0	2
DG1136a	2	71997634	81159224	9161591	0.5625	3	HET	1	1
DG1136a	2	81159237	81159752	516	0.7568	2	NLOH	0	2
DG1136a	2	81161488	87376944	6215457	0.5625	3	HET	1	1
DG1136a	2	87389521	87814736	425216	0.6953	4	NLOH	0	2
DG1136a	2	87818844	88157834	338991	0.617	3	HET	1	1
DG1136a	2	88160562	88186128	25567	0.75	2	NLOH	0	2
DG1136a	2	88209307	89070945	861639	0.5588	3	HET	1	1
DG1136a	2	89070971	89073053	2083	0.737	2	NLOH	0	2
DG1136a	2	89073178	89073584	407	0.5592	3	HET	1	1
DG1136a	2	89073620	89077470	3851	0.6667	2	NLOH	0	2
DG1136a	2	89077527	89077649	123	0.5259	3	HET	1	1
DG1136a	2	89077717	89081526	3810	0.6986	2	NLOH	0	2
DG1136a	2	89081554	89102967	21414	0.6118	3	HET	1	1
DG1136a	2	89103134	89104985	1852	0.907	2	NLOH	0	2
DG1136a	2	89107189	89621455	514267	0.5714	3	HET	1	1
DG1136a	2	89830450	89879470	49021	0.6159	6	HET	1	2
DG1136a	2	89880051	90295421	415371	0.5811	3	HET	1	1
DG1136a	2	90371937	90381626	9690	0.6255	12	ASCNA	1	3
DG1136a	2	90403207	90413177	9971	0.6068	3	HET	1	1
DG1136a	2	90413437	90464641	51205	0.7018	2	NLOH	0	2
DG1136a	2	90464714	90466327	1614	0.5585	3	HET	1	1
DG1136a	2	90466420	90470299	3880	0.6877	4	NLOH	0	2
DG1136a	2	90470679	90472713	2035	0.58	3	HET	1	1
DG1136a	2	90472770	90486631	13862	0.72	4	NLOH	0	2
DG1136a	2	91599099	91599763	665	0.7857	8	ALOH	0	3
DG1136a	2	91624684	91625435	752	0.5818	3	HET	1	1
DG1136a	2	91627170	91685079	57910	0.7	2	NLOH	0	2
DG1136a	2	91685128	91685419	292	0.525	3	HET	1	1
DG1136a	2	91685939	91728319	42381	0.6875	2	NLOH	0	2
DG1136a	2	91728364	91738407	10044	0.5579	3	HET	1	1
DG1136a	2	91738583	91759934	21352	0.6997	4	NLOH	0	2
DG1136a	2	91760274	91760727	454	0.5097	3	HET	1	1
DG1136a	2	91760799	91761360	562	0.7922	4	NLOH	0	2
DG1136a	2	91761369	91761544	176	0.534	3	HET	1	1
DG1136a	2	91761550	91761554	5	0.8579	4	NLOH	0	2
DG1136a	2	91761807	91762088	282	0.5542	3	HET	1	1
DG1136a	2	91762100	91763820	1721	0.7122	2	NLOH	0	2
DG1136a	2	91763840	91766961	3122	0.5789	3	HET	1	1
DG1136a	2	91766964	91769739	2776	0.7797	4	NLOH	0	2
DG1136a	2	91769832	91775512	5681	0.5764	3	HET	1	1
DG1136a	2	91775690	91776031	342	0.7393	2	NLOH	0	2
DG1136a	2	91776114	91778305	2192	0.622	3	HET	1	1
DG1136a	2	91778333	91780079	1747	0.6418	2	NLOH	0	2
DG1136a	2	91780408	91782481	2074	0.5729	3	HET	1	1
DG1136a	2	91782615	91783103	489	0.6886	4	NLOH	0	2
DG1136a	2	91783449	91784694	1246	0.5571	3	HET	1	1
DG1136a	2	91784789	91785423	635	0.6506	2	NLOH	0	2
DG1136a	2	91785578	91787368	1791	0.5572	3	HET	1	1
DG1136a	2	91787518	91788052	535	0.7283	2	NLOH	0	2
DG1136a	2	91788462	91795325	6864	0.5664	3	HET	1	1
DG1136a	2	91795381	91795675	295	0.8306	4	NLOH	0	2
DG1136a	2	91796008	91797752	1745	0.5635	3	HET	1	1
DG1136a	2	91797826	91799114	1289	0.7155	2	NLOH	0	2
DG1136a	2	91799128	91802820	3693	0.5652	3	HET	1	1
DG1136a	2	91803219	91803760	542	0.7	4	NLOH	0	2
DG1136a	2	91804133	91817185	13053	0.5562	3	HET	1	1
DG1136a	2	91817709	91818190	482	0.8689	2	NLOH	0	2
DG1136a	2	91818229	91825095	6867	0.5621	3	HET	1	1
DG1136a	2	91825487	91857944	32458	0.6739	4	NLOH	0	2
DG1136a	2	91858906	91882974	24069	0.617	3	HET	1	1
DG1136a	2	91883992	91899301	15310	0.6842	2	NLOH	0	2
DG1136a	2	91899400	91973296	73897	0.6104	3	HET	1	1
DG1136a	2	91973305	91973852	548	0.7143	2	NLOH	0	2
DG1136a	2	91974220	91987146	12927	0.5909	3	HET	1	1
DG1136a	2	91987373	92257540	270168	0.7429	2	NLOH	0	2
DG1136a	2	92257598	92257961	364	0.5359	3	HET	1	1
DG1136a	2	92258738	92269897	11160	0.7273	2	NLOH	0	2
DG1136a	2	92269908	92281060	11153	0.5962	3	HET	1	1
DG1136a	2	92281107	92281513	407	0.75	2	NLOH	0	2
DG1136a	2	92281550	92282721	1172	0.6123	3	HET	1	1
DG1136a	2	92284647	92286323	1677	0.6786	4	NLOH	0	2
DG1136a	2	92286336	92288495	2160	0.5714	3	HET	1	1
DG1136a	2	92288542	92315455	26914	0.6877	2	NLOH	0	2
DG1136a	2	92315467	92316007	541	0.5217	3	HET	1	1
DG1136a	2	92316183	95592688	3276506	0.7353	2	NLOH	0	2
DG1136a	2	95625722	96430143	804422	0.615	3	HET	1	1
DG1136a	2	96457890	96524051	66162	0.72	2	NLOH	0	2
DG1136a	2	96524071	96524935	865	0.5938	3	HET	1	1
DG1136a	2	96524983	96526310	1328	0.6851	2	NLOH	0	2
DG1136a	2	96526425	96526817	393	0.5843	3	HET	1	1
DG1136a	2	96526842	96597745	70904	0.6923	2	NLOH	0	2
DG1136a	2	96597823	96598538	716	0.5712	3	HET	1	1
DG1136a	2	96598671	96603114	4444	0.6914	2	NLOH	0	2
DG1136a	2	96603238	96603633	396	0.5833	3	HET	1	1
DG1136a	2	96603834	96604420	587	0.7182	2	NLOH	0	2
DG1136a	2	96604516	96605505	990	0.6	3	HET	1	1
DG1136a	2	96605728	96607609	1882	0.7495	4	NLOH	0	2
DG1136a	2	96607635	96608526	892	0.575	3	HET	1	1
DG1136a	2	96608890	96615790	6901	0.7124	2	NLOH	0	2
DG1136a	2	96615810	96617090	1281	0.6023	3	HET	1	1
DG1136a	2	96617106	96676301	59196	0.6583	2	NLOH	0	2
DG1136a	2	96680339	97672612	992274	0.5588	3	HET	1	1
DG1136a	2	97688294	97831421	143128	0.7368	2	NLOH	0	2
DG1136a	2	97831580	97834481	2902	0.6093	3	HET	1	1
DG1136a	2	97834587	97839051	4465	0.6939	2	NLOH	0	2
DG1136a	2	97839135	98176710	337576	0.5897	3	HET	1	1
DG1136a	2	98177618	98178509	892	0.8438	2	NLOH	0	2
DG1136a	2	98178699	110995383	12816685	0.5625	3	HET	1	1
DG1136a	2	111035902	111200519	164618	0.6819	4	NLOH	0	2
DG1136a	2	111347036	112120824	773789	0.5652	3	HET	1	1
DG1136a	2	112126838	112184296	57459	0.6364	2	NLOH	0	2
DG1136a	2	112185388	113044719	859332	0.5769	3	HET	1	1
DG1136a	2	113045328	113047788	2461	0.6774	2	NLOH	0	2
DG1136a	2	113048031	113115598	67568	0.5691	3	HET	1	1
DG1136a	2	113116332	113204391	88060	0.6667	2	NLOH	0	2
DG1136a	2	113208114	114173484	965371	0.5652	3	HET	1	1
DG1136a	2	114173521	114357862	184342	0.7273	2	NLOH	0	2
DG1136a	2	114358693	121148965	6790273	0.5652	3	HET	1	1
DG1136a	2	121148992	121149478	487	0.7324	2	NLOH	0	2
DG1136a	2	121152012	126180088	5028077	0.5625	3	HET	1	1
DG1136a	2	126180389	126180418	30	0.9024	2	NLOH	0	2
DG1136a	2	126180541	130763615	4583075	0.5652	3	HET	1	1
DG1136a	2	130773683	131489419	715737	0.7143	4	NLOH	0	2
DG1136a	2	131557486	131949439	391954	0.5664	3	HET	1	1
DG1136a	2	131949542	132098744	149203	0.7477	4	NLOH	0	2
DG1136a	2	132105222	132454023	348802	0.5769	3	HET	1	1
DG1136a	2	132481426	132553672	72247	0.6667	2	NLOH	0	2
DG1136a	2	132554697	132761716	207020	0.5833	3	HET	1	1
DG1136a	2	132762379	132905500	143122	0.7442	2	NLOH	0	2
DG1136a	2	132909343	132938252	28910	0.5714	3	HET	1	1
DG1136a	2	132938674	132987151	48478	0.7255	2	NLOH	0	2
DG1136a	2	132987295	132988159	865	0.5652	3	HET	1	1
DG1136a	2	132988341	132999405	11065	0.7895	2	NLOH	0	2
DG1136a	2	133000994	133002093	1100	0.5557	3	HET	1	1
DG1136a	2	133002143	133002736	594	0.6923	2	NLOH	0	2
DG1136a	2	133003093	133004171	1079	0.6154	3	HET	1	1
DG1136a	2	133004192	133007554	3363	0.6883	2	NLOH	0	2
DG1136a	2	133007588	133007730	143	0.5292	3	HET	1	1
DG1136a	2	133007753	133012633	4881	0.7155	2	NLOH	0	2
DG1136a	2	133012674	133013318	645	0.5696	3	HET	1	1
DG1136a	2	133013324	133019823	6500	0.6923	2	NLOH	0	2
DG1136a	2	133019832	133019895	64	0.5568	3	HET	1	1
DG1136a	2	133020261	133022250	1990	0.6629	2	NLOH	0	2
DG1136a	2	133022317	133022657	341	0.6042	3	HET	1	1
DG1136a	2	133022665	133025285	2621	0.7273	2	NLOH	0	2
DG1136a	2	133025347	133025877	531	0.5862	3	HET	1	1
DG1136a	2	133025968	133028872	2905	0.76	2	NLOH	0	2
DG1136a	2	133029064	133031440	2377	0.6	3	HET	1	1
DG1136a	2	133031572	133037115	5544	0.6923	2	NLOH	0	2
DG1136a	2	133037140	133038625	1486	0.5833	3	HET	1	1
DG1136a	2	133038681	133041002	2322	0.7419	2	NLOH	0	2
DG1136a	2	133041061	133041834	774	0.6055	3	HET	1	1
DG1136a	2	133041948	133042346	399	0.7258	2	NLOH	0	2
DG1136a	2	133042427	133043782	1356	0.6071	3	HET	1	1
DG1136a	2	133043841	133044344	504	0.7048	2	NLOH	0	2
DG1136a	2	133044390	133045230	841	0.561	3	HET	1	1
DG1136a	2	133045249	133046135	887	0.7602	2	NLOH	0	2
DG1136a	2	133046193	133115473	69281	0.5636	3	HET	1	1
DG1136a	2	133116110	133121033	4924	0.6667	2	NLOH	0	2
DG1136a	2	133121131	162135064	29013934	0.5625	3	HET	1	1
DG1136a	2	162135093	162139031	3939	0.6757	4	NLOH	0	2
DG1136a	2	162139069	217247182	55108114	0.561	3	HET	1	1
DG1136a	2	217247466	217247662	197	0.7183	2	NLOH	0	2
DG1136a	2	217247671	235108208	17860538	0.5625	3	HET	1	1
DG1136a	2	235108666	235108753	88	0.875	2	NLOH	0	2
DG1136a	2	235109087	239674876	4565790	0.5625	3	HET	1	1
DG1136a	2	239675918	239676601	684	0.7318	2	NLOH	0	2
DG1136a	2	239676940	240042101	365162	0.5652	3	HET	1	1
DG1136a	2	240046369	240046699	331	0.7344	2	NLOH	0	2
DG1136a	2	240056201	242529703	2473503	0.5714	3	HET	1	1
DG1136a	2	242529742	242530670	929	0.7008	2	NLOH	0	2
DG1136a	2	242531133	242536068	4936	0.5598	3	HET	1	1
DG1136a	2	242536143	242536182	40	0.9118	2	NLOH	0	2
DG1136a	2	242536585	242929531	392947	0.5714	3	HET	1	1
DG1136a	2	242929535	242929638	104	0.7248	2	NLOH	0	2
DG1136a	2	242929641	243085379	155739	0.5897	3	HET	1	1
DG1136a	2	243152763	243185955	33193	0.7941	4	NLOH	0	2
DG1136a	3	60596	636707	576112	0.7727	1	DLOH	0	1
DG1136a	3	636877	641588	4712	0.6316	3	HET	1	1
DG1136a	3	641644	655741	14098	0.7143	1	DLOH	0	1
DG1136a	3	655821	663181	7361	0.5969	3	HET	1	1
DG1136a	3	668003	61057506	60389504	0.7647	1	DLOH	0	1
DG1136a	3	61061861	61711382	649522	0.6308	6	HET	1	2
DG1136a	3	61718150	75265195	13547046	0.5625	3	HET	1	1
DG1136a	3	75270680	75272733	2054	0.7	2	NLOH	0	2
DG1136a	3	75272766	75274478	1713	0.573	3	HET	1	1
DG1136a	3	75274528	75277177	2650	0.7222	2	NLOH	0	2
DG1136a	3	75277620	75602708	325089	0.561	3	HET	1	1
DG1136a	3	75606332	75646495	40164	0.6429	7	HET	1	2
DG1136a	3	75684659	75738988	54330	0.7333	4	NLOH	0	2
DG1136a	3	75739030	75764695	25666	0.7059	1	DLOH	0	1
DG1136a	3	75803184	75904419	101236	0.7778	2	NLOH	0	2
DG1136a	3	75904907	75905758	852	0.5556	3	HET	1	1
DG1136a	3	75905861	75913316	7456	0.7	2	NLOH	0	2
DG1136a	3	75913342	75981817	68476	0.5606	3	HET	1	1
DG1136a	3	75983394	75984121	728	0.6849	2	NLOH	0	2
DG1136a	3	75984143	75987901	3759	0.6079	3	HET	1	1
DG1136a	3	75988024	75998719	10696	0.6875	2	NLOH	0	2
DG1136a	3	75999516	76052332	52817	0.583	3	HET	1	1
DG1136a	3	76060724	76063120	2397	0.8113	2	NLOH	0	2
DG1136a	3	76063619	77339255	1275637	0.5667	3	HET	1	1
DG1136a	3	77339964	77342623	2660	0.684	4	NLOH	0	2
DG1136a	3	77342834	77404022	61189	0.5599	3	HET	1	1
DG1136a	3	77404253	77404334	82	0.7322	4	NLOH	0	2
DG1136a	3	77404340	77823108	418769	0.5581	3	HET	1	1
DG1136a	3	77825393	77835369	9977	0.7101	2	NLOH	0	2
DG1136a	3	77835536	79668106	1832571	0.5625	3	HET	1	1
DG1136a	3	79668183	79668349	167	0.7818	2	NLOH	0	2
DG1136a	3	79668510	86887528	7219019	0.561	3	HET	1	1
DG1136a	3	86909636	86941385	31750	0.7112	2	NLOH	0	2
DG1136a	3	86978464	90398130	3419667	0.561	3	HET	1	1
DG1136a	3	90403174	90403237	64	0.7166	2	NLOH	0	2
DG1136a	3	90403273	90454802	51530	0.5758	3	HET	1	1
DG1136a	3	90457017	90472059	15043	0.6592	2	NLOH	0	2
DG1136a	3	90474059	90488353	14295	0.5434	3	HET	1	1
DG1136a	3	90490959	93512937	3021979	0.725	2	NLOH	0	2
DG1136a	3	93514105	115945329	22431225	0.561	3	HET	1	1
DG1136a	3	116058551	116121045	62495	0.7163	3	HET	1	1
DG1136a	3	116176544	116272803	96260	0.5682	3	HET	1	1
DG1136a	3	116273556	116366873	93318	0.7308	1	DLOH	0	1
DG1136a	3	116367226	116368018	793	0.7205	2	NLOH	0	2
DG1136a	3	116368746	117370945	1002200	0.5625	3	HET	1	1
DG1136a	3	117387144	117490367	103224	0.7333	3	HET	1	1
DG1136a	3	117499343	125436956	7937614	0.5625	3	HET	1	1
DG1136a	3	125437360	125445525	8166	0.6667	2	NLOH	0	2
DG1136a	3	125445672	125484300	38629	0.5909	3	HET	1	1
DG1136a	3	125484779	125491458	6680	0.6667	2	NLOH	0	2
DG1136a	3	125491731	129799802	4308072	0.5714	3	HET	1	1
DG1136a	3	129799933	129809474	9542	0.6923	2	NLOH	0	2
DG1136a	3	129810022	161557749	31747728	0.561	3	HET	1	1
DG1136a	3	161558017	161558644	628	0.7638	4	NLOH	0	2
DG1136a	3	161558866	167556722	5997857	0.5625	3	HET	1	1
DG1136a	3	167585957	174317883	6731927	0.6301	7	HET	1	2
DG1136a	3	174321703	174358992	37290	0.6296	3	HET	1	1
DG1136a	3	174359532	174361998	2467	0.6757	2	NLOH	0	2
DG1136a	3	174363743	174477549	113807	0.6109	3	HET	1	1
DG1136a	3	174479036	174482457	3422	0.72	2	NLOH	0	2
DG1136a	3	174482644	174640744	158101	0.6346	3	HET	1	1
DG1136a	3	174641606	189813490	15171885	0.6286	7	HET	1	2
DG1136a	3	189828660	195199069	5370410	0.5625	3	HET	1	1
DG1136a	3	195199097	195199354	258	0.8077	2	NLOH	0	2
DG1136a	3	195212319	195212466	148	0.8598	9	ALOH	0	4
DG1136a	3	195212729	195233686	20958	0.7059	10	ASCNA	1	3
DG1136a	3	195234106	195342260	108155	0.5633	3	HET	1	1
DG1136a	3	195342366	195456478	114113	0.6957	2	NLOH	0	2
DG1136a	3	195456561	195499635	43075	0.5806	3	HET	1	1
DG1136a	3	195502295	195507941	5647	0.7228	6	HET	1	2
DG1136a	3	195507999	195510134	2136	0.8148	5	ALOH	0	3
DG1136a	3	195510192	195515401	5210	0.654	6	HET	1	2
DG1136a	3	195520379	195669598	149220	0.5667	3	HET	1	1
DG1136a	3	195670702	195733088	62387	0.7166	2	NLOH	0	2
DG1136a	3	195733119	195828586	95468	0.5652	3	HET	1	1
DG1136a	3	195830265	195830565	301	0.8762	2	NLOH	0	2
DG1136a	3	195830880	197111258	1280379	0.5714	3	HET	1	1
DG1136a	3	197111267	197118205	6939	0.6786	2	NLOH	0	2
DG1136a	3	197118688	197174572	55885	0.5617	3	HET	1	1
DG1136a	3	197186320	197186607	288	0.7222	2	NLOH	0	2
DG1136a	3	197186638	197348786	162149	0.5769	3	HET	1	1
DG1136a	3	197349309	197393840	44532	0.697	2	NLOH	0	2
DG1136a	3	197394907	197845233	450327	0.5783	3	HET	1	1
DG1136a	3	197845638	197922510	76873	0.6771	2	NLOH	0	2
DG1136a	4	11961	37263	25303	0.7167	4	NLOH	0	2
DG1136a	4	37338	37975	638	0.5223	3	HET	1	1
DG1136a	4	38183	42399	4217	0.7339	4	NLOH	0	2
DG1136a	4	42939	43968	1030	0.5	3	HET	1	1
DG1136a	4	44463	63081	18619	0.7378	4	NLOH	0	2
DG1136a	4	63459	64368	910	0.5546	3	HET	1	1
DG1136a	4	64378	68603	4226	0.7415	4	NLOH	0	2
DG1136a	4	72048	1417515	1345468	0.5745	3	HET	1	1
DG1136a	4	1421433	1423089	1657	0.8073	4	NLOH	0	2
DG1136a	4	1478976	3536882	2057907	0.5714	3	HET	1	1
DG1136a	4	3537641	3558822	21182	0.7241	2	NLOH	0	2
DG1136a	4	3559476	3567974	8499	0.6047	3	HET	1	1
DG1136a	4	3568023	3570621	2599	0.7183	2	NLOH	0	2
DG1136a	4	3572768	3596478	23711	0.5596	3	HET	1	1
DG1136a	4	3596569	3597048	480	0.7143	4	NLOH	0	2
DG1136a	4	3597088	3599539	2452	0.5698	3	HET	1	1
DG1136a	4	3599545	3601828	2284	0.6842	2	NLOH	0	2
DG1136a	4	3601836	3607936	6101	0.575	3	HET	1	1
DG1136a	4	3608099	3608467	369	0.7339	2	NLOH	0	2
DG1136a	4	3608536	3631680	23145	0.575	3	HET	1	1
DG1136a	4	3631721	3632160	440	0.7307	2	NLOH	0	2
DG1136a	4	3632195	3810750	178556	0.5652	3	HET	1	1
DG1136a	4	3811041	3817234	6194	0.6579	2	NLOH	0	2
DG1136a	4	3817381	4108394	291014	0.5789	3	HET	1	1
DG1136a	4	4121968	4125306	3339	0.8148	2	NLOH	0	2
DG1136a	4	4159257	4224713	65457	0.5769	3	HET	1	1
DG1136a	4	4227351	4231697	4347	0.7122	2	NLOH	0	2
DG1136a	4	4231927	5707559	1475633	0.5641	3	HET	1	1
DG1136a	4	5708040	5708172	133	0.7619	4	NLOH	0	2
DG1136a	4	5710647	7126542	1415896	0.5667	3	HET	1	1
DG1136a	4	7126828	7133397	6570	0.7586	2	NLOH	0	2
DG1136a	4	7136757	8841926	1705170	0.5667	3	HET	1	1
DG1136a	4	8844043	8844349	307	0.7804	2	NLOH	0	2
DG1136a	4	8844531	9158076	313546	0.5758	3	HET	1	1
DG1136a	4	9174014	9198626	24613	0.712	2	NLOH	0	2
DG1136a	4	9240080	9360726	120647	0.6412	6	HET	1	2
DG1136a	4	9370544	9606369	235826	0.5667	3	HET	1	1
DG1136a	4	9611368	9786449	175082	0.7619	2	NLOH	0	2
DG1136a	4	9786486	9982863	196378	0.5667	3	HET	1	1
DG1136a	4	9982872	9982945	74	0.7199	2	NLOH	0	2
DG1136a	4	9984541	19521181	9536641	0.5625	3	HET	1	1
DG1136a	4	19521425	19522025	601	0.7328	4	NLOH	0	2
DG1136a	4	19522030	21824394	2302365	0.561	3	HET	1	1
DG1136a	4	21851163	22118059	266897	0.75	1	DLOH	0	1
DG1136a	4	22119167	22122581	3415	0.6207	3	HET	1	1
DG1136a	4	22123675	25810495	3686821	0.5625	3	HET	1	1
DG1136a	4	25810520	25810581	62	0.9333	2	NLOH	0	2
DG1136a	4	25811723	26219793	408071	0.5641	3	HET	1	1
DG1136a	4	26245913	26246057	145	0.7336	2	NLOH	0	2
DG1136a	4	26253847	33726818	7472972	0.5625	3	HET	1	1
DG1136a	4	33745253	33840367	95115	0.729	2	NLOH	0	2
DG1136a	4	33840519	33840872	354	0.5607	3	HET	1	1
DG1136a	4	33842256	33845182	2927	0.7515	2	NLOH	0	2
DG1136a	4	33845202	33847024	1823	0.6282	3	HET	1	1
DG1136a	4	33847162	33858970	11809	0.7333	2	NLOH	0	2
DG1136a	4	33859099	33859482	384	0.5833	3	HET	1	1
DG1136a	4	33859557	33860027	471	0.7339	2	NLOH	0	2
DG1136a	4	33860089	33861776	1688	0.5577	3	HET	1	1
DG1136a	4	33861933	34009305	147373	0.7653	2	NLOH	0	2
DG1136a	4	34017663	40296261	6278599	0.5625	3	HET	1	1
DG1136a	4	40296266	40297770	1505	0.7246	2	NLOH	0	2
DG1136a	4	40298198	45015255	4717058	0.5625	3	HET	1	1
DG1136a	4	45015395	45015975	581	0.7252	2	NLOH	0	2
DG1136a	4	45018583	49079073	4060491	0.56	3	HET	1	1
DG1136a	4	49093349	49094620	1272	0.6506	2	NLOH	0	2
DG1136a	4	49094653	49096560	1908	0.6018	3	HET	1	1
DG1136a	4	49096574	49098508	1935	0.6391	2	NLOH	0	2
DG1136a	4	49098548	49100186	1639	0.6129	3	HET	1	1
DG1136a	4	49100361	49104806	4446	0.6495	4	NLOH	0	2
DG1136a	4	49104953	49108053	3101	0.587	3	HET	1	1
DG1136a	4	49108107	49110626	2520	0.66	4	NLOH	0	2
DG1136a	4	49110833	49111245	413	0.5667	3	HET	1	1
DG1136a	4	49111286	49112691	1406	0.6831	2	NLOH	0	2
DG1136a	4	49112799	49113364	566	0.5572	3	HET	1	1
DG1136a	4	49113399	49116792	3394	0.6667	2	NLOH	0	2
DG1136a	4	49116797	49117020	224	0.5474	3	HET	1	1
DG1136a	4	49117222	49120445	3224	0.6993	2	NLOH	0	2
DG1136a	4	49120502	49122052	1551	0.5864	3	HET	1	1
DG1136a	4	49122063	49123999	1937	0.6724	2	NLOH	0	2
DG1136a	4	49124123	49125943	1821	0.7702	5	ALOH	0	3
DG1136a	4	49125951	49135687	9737	0.7143	6	HET	1	2
DG1136a	4	49135697	49136327	631	0.8487	5	ALOH	0	3
DG1136a	4	49137784	49146091	8308	0.6809	6	HET	1	2
DG1136a	4	49146102	49147397	1296	0.8039	5	ALOH	0	3
DG1136a	4	49147607	49148175	569	0.6823	7	HET	1	2
DG1136a	4	49148234	49148609	376	0.8182	5	ALOH	0	3
DG1136a	4	49149110	49158610	9501	0.6485	7	HET	1	2
DG1136a	4	49158616	49158705	90	0.8656	5	ALOH	0	3
DG1136a	4	49158797	49158995	199	0.7069	6	HET	1	2
DG1136a	4	49159115	49159115	1	0.5242	3	HET	1	1
DG1136a	4	49159259	49208237	48979	0.732	2	NLOH	0	2
DG1136a	4	49209304	49210529	1226	0.5789	3	HET	1	1
DG1136a	4	49210977	49212546	1570	0.7778	2	NLOH	0	2
DG1136a	4	49212755	49213501	747	0.5577	3	HET	1	1
DG1136a	4	49213523	49218121	4599	0.686	2	NLOH	0	2
DG1136a	4	49218224	49218916	693	0.5231	3	HET	1	1
DG1136a	4	49219019	49221042	2024	0.7097	2	NLOH	0	2
DG1136a	4	49221189	49221456	268	0.5312	3	HET	1	1
DG1136a	4	49221619	49223644	2026	0.6906	4	NLOH	0	2
DG1136a	4	49223752	49224682	931	0.5573	3	HET	1	1
DG1136a	4	49224720	49226100	1381	0.7254	2	NLOH	0	2
DG1136a	4	49226114	49226409	296	0.5426	3	HET	1	1
DG1136a	4	49226630	49316546	89917	0.7096	4	NLOH	0	2
DG1136a	4	49316589	49317363	775	0.55	3	HET	1	1
DG1136a	4	49317576	49571169	253594	0.7	2	NLOH	0	2
DG1136a	4	49571333	49573063	1731	0.5464	3	HET	1	1
DG1136a	4	49574373	49604956	30584	0.75	2	NLOH	0	2
DG1136a	4	49605252	49632969	27718	0.8063	1	DLOH	0	1
DG1136a	4	49633037	49636872	3836	0.6696	4	NLOH	0	2
DG1136a	4	49636945	49637801	857	0.5825	3	HET	1	1
DG1136a	4	49638064	49659961	21898	0.7222	4	NLOH	0	2
DG1136a	4	49659980	65530791	15870812	0.5625	3	HET	1	1
DG1136a	4	65530986	65534461	3476	0.6931	2	NLOH	0	2
DG1136a	4	65534600	68262262	2727663	0.5633	3	HET	1	1
DG1136a	4	68265791	68266721	931	0.675	4	NLOH	0	2
DG1136a	4	68267437	70137911	1870475	0.5641	3	HET	1	1
DG1136a	4	70138515	70143077	4563	0.6731	4	NLOH	0	2
DG1136a	4	70145504	70243570	98067	0.5641	3	HET	1	1
DG1136a	4	70244764	70249034	4271	0.7222	4	NLOH	0	2
DG1136a	4	70249768	76199243	5949476	0.561	3	HET	1	1
DG1136a	4	76201523	76201970	448	0.875	2	NLOH	0	2
DG1136a	4	76202268	88506374	12304107	0.5614	3	HET	1	1
DG1136a	4	88507732	88507827	96	0.7906	2	NLOH	0	2
DG1136a	4	88508406	103813881	15305476	0.561	3	HET	1	1
DG1136a	4	103814293	103833092	18800	0.6776	2	NLOH	0	2
DG1136a	4	103833889	130382760	26548872	0.561	3	HET	1	1
DG1136a	4	130388437	130388440	4	0.5471	3	HET	1	1
DG1136a	4	130389155	147881419	17492265	0.75	1	DLOH	0	1
DG1136a	4	147884782	151280704	3395923	0.8387	2	NLOH	0	2
DG1136a	4	151284967	151643609	358643	0.7619	1	DLOH	0	1
DG1136a	4	151680214	187879767	36199554	0.8333	2	NLOH	0	2
DG1136a	4	187880155	187889996	9842	0.9091	5	ALOH	0	3
DG1136a	4	187894359	190201161	2306803	0.8333	2	NLOH	0	2
DG1136a	4	190201162	190202506	1345	0.5815	3	HET	1	1
DG1136a	4	190202550	190550561	348012	0.7814	4	NLOH	0	2
DG1136a	4	190550643	190551029	387	0.5251	3	HET	1	1
DG1136a	4	190551098	190566557	15460	0.7231	2	NLOH	0	2
DG1136a	4	190566561	190566688	128	0.56	3	HET	1	1
DG1136a	4	190566722	190610281	43560	0.7105	2	NLOH	0	2
DG1136a	4	190610327	190610355	29	0.52	3	HET	1	1
DG1136a	4	190610403	190615491	5089	0.7096	2	NLOH	0	2
DG1136a	4	190615560	190616011	452	0.6049	3	HET	1	1
DG1136a	4	190616133	190817605	201473	0.7193	2	NLOH	0	2
DG1136a	4	190817641	190818030	390	0.561	3	HET	1	1
DG1136a	4	190818172	190823323	5152	0.7123	2	NLOH	0	2
DG1136a	4	190825217	190827237	2021	0.5745	3	HET	1	1
DG1136a	4	190827262	190841318	14057	0.7161	2	NLOH	0	2
DG1136a	4	190841335	190842731	1397	0.569	3	HET	1	1
DG1136a	4	190842744	190846280	3537	0.6957	2	NLOH	0	2
DG1136a	4	190846494	190853117	6624	0.5575	3	HET	1	1
DG1136a	4	190853154	191044256	191103	0.7257	4	NLOH	0	2
DG1136a	5	11582	402636	391055	0.5676	3	HET	1	1
DG1136a	5	415476	474510	59035	0.7419	4	NLOH	0	2
DG1136a	5	481249	542322	61074	0.6071	3	HET	1	1
DG1136a	5	542351	651172	108822	0.7037	2	NLOH	0	2
DG1136a	5	668791	706281	37491	0.6	3	HET	1	1
DG1136a	5	706662	710726	4065	0.6857	2	NLOH	0	2
DG1136a	5	711030	825160	114131	0.5968	3	HET	1	1
DG1136a	5	825540	844877	19338	0.6765	2	NLOH	0	2
DG1136a	5	845015	1004606	159592	0.5646	3	HET	1	1
DG1136a	5	1022418	1046550	24133	0.7222	4	NLOH	0	2
DG1136a	5	1047394	1331219	283826	0.5833	3	HET	1	1
DG1136a	5	1333077	1336243	3167	0.7429	2	NLOH	0	2
DG1136a	5	1336459	1532324	195866	0.5625	3	HET	1	1
DG1136a	5	1533335	1540347	7013	0.7273	2	NLOH	0	2
DG1136a	5	1545669	2145655	599987	0.5714	3	HET	1	1
DG1136a	5	2145877	2146910	1034	0.7049	2	NLOH	0	2
DG1136a	5	2146924	11069793	8922870	0.5625	3	HET	1	1
DG1136a	5	11120433	11144238	23806	0.8214	4	NLOH	0	2
DG1136a	5	11148537	21477392	10328856	0.5625	3	HET	1	1
DG1136a	5	21478165	21522192	44028	0.6786	2	NLOH	0	2
DG1136a	5	21523169	21542994	19826	0.55	3	HET	1	1
DG1136a	5	21543033	21543207	175	0.8333	2	NLOH	0	2
DG1136a	5	21543243	22627703	1084461	0.5588	3	HET	1	1
DG1136a	5	22628050	22677974	49925	0.6562	4	NLOH	0	2
DG1136a	5	22678952	23696679	1017728	0.6201	3	HET	1	1
DG1136a	5	23696854	23707397	10544	0.6697	4	NLOH	0	2
DG1136a	5	23708094	24562988	854895	0.625	3	HET	1	1
DG1136a	5	24563285	24579958	16674	0.7416	4	NLOH	0	2
DG1136a	5	24602285	26588052	1985768	0.619	3	HET	1	1
DG1136a	5	26588165	26591239	3075	0.7143	4	NLOH	0	2
DG1136a	5	26591312	27213258	621947	0.6216	3	HET	1	1
DG1136a	5	27214785	27314365	99581	0.6758	4	NLOH	0	2
DG1136a	5	27318391	27875181	556791	0.6207	3	HET	1	1
DG1136a	5	27875525	27881977	6453	0.6852	4	NLOH	0	2
DG1136a	5	27882503	28127057	244555	0.6316	3	HET	1	1
DG1136a	5	28127295	28156157	28863	0.6696	2	NLOH	0	2
DG1136a	5	28160849	28775510	614662	0.627	3	HET	1	1
DG1136a	5	28780541	28960256	179716	0.7113	4	NLOH	0	2
DG1136a	5	28968268	29371306	403039	0.6286	3	HET	1	1
DG1136a	5	29372995	29425153	52159	0.6631	2	NLOH	0	2
DG1136a	5	29425215	29426107	893	0.566	3	HET	1	1
DG1136a	5	29426131	29427520	1390	0.7183	2	NLOH	0	2
DG1136a	5	29427538	29431050	3513	0.5714	3	HET	1	1
DG1136a	5	29431133	29431647	515	0.7627	2	NLOH	0	2
DG1136a	5	29431694	29433857	2164	0.5907	3	HET	1	1
DG1136a	5	29433889	29476382	42494	0.6739	4	NLOH	0	2
DG1136a	5	29478168	29523220	45053	0.6098	3	HET	1	1
DG1136a	5	29523829	29540930	17102	0.6641	4	NLOH	0	2
DG1136a	5	29541621	29770456	228836	0.6277	3	HET	1	1
DG1136a	5	29771525	29781562	10038	0.6889	4	NLOH	0	2
DG1136a	5	29782968	29790636	7669	0.603	3	HET	1	1
DG1136a	5	29791004	29804677	13674	0.6667	2	NLOH	0	2
DG1136a	5	29805195	30044591	239397	0.625	3	HET	1	1
DG1136a	5	30044759	30050434	5676	0.661	4	NLOH	0	2
DG1136a	5	30051893	30481520	429628	0.6216	3	HET	1	1
DG1136a	5	30482662	30500322	17661	0.6859	2	NLOH	0	2
DG1136a	5	30503228	30914677	411450	0.6389	3	HET	1	1
DG1136a	5	30916247	30953137	36891	0.6522	2	NLOH	0	2
DG1136a	5	30954323	31776617	822295	0.6207	3	HET	1	1
DG1136a	5	31777029	31815195	38167	0.6667	4	NLOH	0	2
DG1136a	5	31815875	32349641	533767	0.619	3	HET	1	1
DG1136a	5	32351928	32446276	94349	0.6667	4	NLOH	0	2
DG1136a	5	32448255	33346548	898294	0.6267	3	HET	1	1
DG1136a	5	33349327	33363062	13736	0.6818	2	NLOH	0	2
DG1136a	5	33363698	34067952	704255	0.625	3	HET	1	1
DG1136a	5	34078477	34410998	332522	0.75	4	NLOH	0	2
DG1136a	5	34419863	35708492	1288630	0.625	3	HET	1	1
DG1136a	5	35708686	35709095	410	0.7361	2	NLOH	0	2
DG1136a	5	35709184	35713173	3990	0.5778	3	HET	1	1
DG1136a	5	35713265	35754695	41431	0.6667	2	NLOH	0	2
DG1136a	5	35756358	35958111	201754	0.6234	3	HET	1	1
DG1136a	5	35958599	35993504	34906	0.6667	2	NLOH	0	2
DG1136a	5	35994784	36833993	839210	0.6226	3	HET	1	1
DG1136a	5	36856961	37542385	685425	0.6487	4	NLOH	0	2
DG1136a	5	37558016	38732005	1173990	0.6207	3	HET	1	1
DG1136a	5	38732782	38762993	30212	0.6754	4	NLOH	0	2
DG1136a	5	38764769	39083117	318349	0.6216	3	HET	1	1
DG1136a	5	39084471	39445594	361124	0.6458	2	NLOH	0	2
DG1136a	5	39446394	39670061	223668	0.617	3	HET	1	1
DG1136a	5	39671325	39690542	19218	0.6784	2	NLOH	0	2
DG1136a	5	39690841	44579366	4888526	0.575	3	HET	1	1
DG1136a	5	44579645	44580526	882	0.8403	2	NLOH	0	2
DG1136a	5	44580892	46094452	1513561	0.5714	3	HET	1	1
DG1136a	5	46094976	46095578	603	0.7442	2	NLOH	0	2
DG1136a	5	46099071	46321553	222483	0.5581	3	HET	1	1
DG1136a	5	46321872	46326818	4947	0.6716	2	NLOH	0	2
DG1136a	5	46326863	46327086	224	0.5505	3	HET	1	1
DG1136a	5	46327099	46327902	804	0.7053	2	NLOH	0	2
DG1136a	5	46328163	46367903	39741	0.5667	3	HET	1	1
DG1136a	5	46368092	46368342	251	0.8462	2	NLOH	0	2
DG1136a	5	46368368	46405411	37044	0.5714	3	HET	1	1
DG1136a	5	46405511	49437056	3031546	0.7308	2	NLOH	0	2
DG1136a	5	49437113	49440779	3667	0.6129	3	HET	1	1
DG1136a	5	49440799	49441342	544	0.8065	2	NLOH	0	2
DG1136a	5	49441621	49476848	35228	0.5714	3	HET	1	1
DG1136a	5	49484525	49493266	8742	0.72	2	NLOH	0	2
DG1136a	5	49493304	49532992	39689	0.5714	3	HET	1	1
DG1136a	5	49534981	49536896	1916	0.6906	2	NLOH	0	2
DG1136a	5	49537030	49547361	10332	0.5682	3	HET	1	1
DG1136a	5	49547433	49547857	425	0.7413	2	NLOH	0	2
DG1136a	5	49548161	61505316	11957156	0.561	3	HET	1	1
DG1136a	5	61529291	61551155	21865	0.7049	2	NLOH	0	2
DG1136a	5	61556977	68914997	7358021	0.561	3	HET	1	1
DG1136a	5	69298177	70527357	1229181	0.6667	2	NLOH	0	2
DG1136a	5	70568621	85586831	15018211	0.5625	3	HET	1	1
DG1136a	5	85587513	85588845	1333	0.7755	2	NLOH	0	2
DG1136a	5	85591115	100421939	14830825	0.5625	3	HET	1	1
DG1136a	5	100422741	100423082	342	0.7045	2	NLOH	0	2
DG1136a	5	100423256	108683248	8259993	0.5641	3	HET	1	1
DG1136a	5	108684002	108691738	7737	0.6842	2	NLOH	0	2
DG1136a	5	108694107	110274978	1580872	0.5625	3	HET	1	1
DG1136a	5	110284188	110286503	2316	0.7352	2	NLOH	0	2
DG1136a	5	110302090	142042822	31740733	0.5625	3	HET	1	1
DG1136a	5	142046874	142108991	62118	0.6458	7	HET	1	2
DG1136a	5	142156118	175355325	33199208	0.5614	3	HET	1	1
DG1136a	5	175355453	175496379	140927	0.7309	2	NLOH	0	2
DG1136a	5	175498176	177266236	1768061	0.5745	3	HET	1	1
DG1136a	5	177266963	177326274	59312	0.6981	4	NLOH	0	2
DG1136a	5	177327523	179072140	1744618	0.5714	3	HET	1	1
DG1136a	5	179077966	180900261	1822296	0.7647	4	NLOH	0	2
DG1136a	6	205696	265420	59725	0.5556	3	HET	1	1
DG1136a	6	265760	299467	33708	0.7143	2	NLOH	0	2
DG1136a	6	300898	335415	34518	0.5901	3	HET	1	1
DG1136a	6	337563	346479	8917	0.7278	2	NLOH	0	2
DG1136a	6	346718	349317	2600	0.5333	3	HET	1	1
DG1136a	6	349343	353123	3781	0.7264	2	NLOH	0	2
DG1136a	6	353442	365163	11722	0.5714	3	HET	1	1
DG1136a	6	365416	382265	16850	0.7027	2	NLOH	0	2
DG1136a	6	382537	898705	516169	0.5682	3	HET	1	1
DG1136a	6	909139	909882	744	0.8451	2	NLOH	0	2
DG1136a	6	919231	989678	70448	0.5455	3	HET	1	1
DG1136a	6	994226	994531	306	0.8276	2	NLOH	0	2
DG1136a	6	994790	1050463	55674	0.5625	3	HET	1	1
DG1136a	6	1053912	1054055	144	0.7335	2	NLOH	0	2
DG1136a	6	1054087	26671336	25617250	0.5625	3	HET	1	1
DG1136a	6	26673767	26696330	22564	0.767	2	NLOH	0	2
DG1136a	6	26700604	26758486	57883	0.6108	3	HET	1	1
DG1136a	6	26760341	26775209	14869	0.7541	2	NLOH	0	2
DG1136a	6	26799118	31291440	4492323	0.5667	3	HET	1	1
DG1136a	6	31291490	31294387	2898	0.8082	2	NLOH	0	2
DG1136a	6	31294479	31297772	3294	0.5834	3	HET	1	1
DG1136a	6	31297833	31299975	2143	0.7308	2	NLOH	0	2
DG1136a	6	31300012	31304135	4124	0.5854	3	HET	1	1
DG1136a	6	31304208	31305153	946	0.7917	2	NLOH	0	2
DG1136a	6	31305206	31306469	1264	0.5585	3	HET	1	1
DG1136a	6	31306536	31307163	628	0.7143	2	NLOH	0	2
DG1136a	6	31307222	32438783	1131562	0.5714	3	HET	1	1
DG1136a	6	32442602	32501347	58746	0.75	2	NLOH	0	2
DG1136a	6	32501455	32502050	596	0.5763	3	HET	1	1
DG1136a	6	32502131	32508945	6815	0.755	2	NLOH	0	2
DG1136a	6	32508981	32521419	12439	0.6066	3	HET	1	1
DG1136a	6	32521580	32552916	31337	0.7	2	NLOH	0	2
DG1136a	6	32553003	32555460	2458	0.6304	3	HET	1	1
DG1136a	6	32555508	32559400	3893	0.6869	2	NLOH	0	2
DG1136a	6	32559468	32570478	11011	0.5779	3	HET	1	1
DG1136a	6	32570550	32572547	1998	0.7166	2	NLOH	0	2
DG1136a	6	32572659	32598622	25964	0.5882	3	HET	1	1
DG1136a	6	32598841	32599265	425	0.7436	2	NLOH	0	2
DG1136a	6	32599303	32601700	2398	0.6207	3	HET	1	1
DG1136a	6	32601760	32627654	25895	0.7143	4	NLOH	0	2
DG1136a	6	32627714	32631583	3870	0.5714	3	HET	1	1
DG1136a	6	32632801	32634164	1364	0.767	2	NLOH	0	2
DG1136a	6	32634394	32642238	7845	0.6	3	HET	1	1
DG1136a	6	32642424	32649062	6639	0.7752	4	NLOH	0	2
DG1136a	6	32649096	32650809	1714	0.5401	3	HET	1	1
DG1136a	6	32650880	32654640	3761	0.7222	4	NLOH	0	2
DG1136a	6	32654658	32703313	48656	0.5714	3	HET	1	1
DG1136a	6	32712818	32728989	16172	0.7845	4	NLOH	0	2
DG1136a	6	32740411	34419882	1679472	0.5641	3	HET	1	1
DG1136a	6	34421995	34462944	40950	0.612	6	HET	1	2
DG1136a	6	34470846	34599705	128860	0.7059	12	ASCNA	1	3
DG1136a	6	34603346	34621584	18239	0.6731	6	HET	1	2
DG1136a	6	34643623	40615615	5971993	0.5667	3	HET	1	1
DG1136a	6	40622764	40622927	164	0.6917	2	NLOH	0	2
DG1136a	6	40623611	57316494	16692884	0.561	3	HET	1	1
DG1136a	6	57316612	57322773	6162	0.7551	2	NLOH	0	2
DG1136a	6	57322923	57369378	46456	0.5556	3	HET	1	1
DG1136a	6	57369434	57381759	12326	0.6645	2	NLOH	0	2
DG1136a	6	57381877	57382187	311	0.5589	3	HET	1	1
DG1136a	6	57382224	57432040	49817	0.67	2	NLOH	0	2
DG1136a	6	57432074	57432851	778	0.5919	3	HET	1	1
DG1136a	6	57432997	57480544	47548	0.6667	2	NLOH	0	2
DG1136a	6	57480571	57481244	674	0.6096	3	HET	1	1
DG1136a	6	57481312	57505632	24321	0.6706	2	NLOH	0	2
DG1136a	6	57505636	57506462	827	0.6105	3	HET	1	1
DG1136a	6	57506484	57541945	35462	0.6707	4	NLOH	0	2
DG1136a	6	57542026	57542545	520	0.5556	3	HET	1	1
DG1136a	6	57542557	57543047	491	0.6696	2	NLOH	0	2
DG1136a	6	57543088	57544719	1632	0.6071	3	HET	1	1
DG1136a	6	57544742	57546177	1436	0.685	2	NLOH	0	2
DG1136a	6	57546228	57546438	211	0.5759	3	HET	1	1
DG1136a	6	57546454	57554553	8100	0.6667	2	NLOH	0	2
DG1136a	6	57554662	57555041	380	0.6133	3	HET	1	1
DG1136a	6	57555079	57560009	4931	0.6585	2	NLOH	0	2
DG1136a	6	57560027	57560668	642	0.5867	3	HET	1	1
DG1136a	6	57560709	57567344	6636	0.6569	2	NLOH	0	2
DG1136a	6	57567374	57567578	205	0.5522	3	HET	1	1
DG1136a	6	57567580	57575827	8248	0.68	2	NLOH	0	2
DG1136a	6	57575931	57591232	15302	0.57	3	HET	1	1
DG1136a	6	57591335	57591604	270	0.6957	2	NLOH	0	2
DG1136a	6	57591716	57592660	945	0.5752	3	HET	1	1
DG1136a	6	57592706	57593187	482	0.7726	2	NLOH	0	2
DG1136a	6	57593231	57607872	14642	0.5636	3	HET	1	1
DG1136a	6	57607927	57806979	199053	0.6667	2	NLOH	0	2
DG1136a	6	57852215	57918169	65955	0.8378	5	ALOH	0	3
DG1136a	6	57924436	58076071	151636	0.6333	6	HET	1	2
DG1136a	6	58140263	58145386	5124	0.8	2	NLOH	0	2
DG1136a	6	58145958	58775242	629285	0.5714	3	HET	1	1
DG1136a	6	58775367	61881814	3106448	0.7966	2	NLOH	0	2
DG1136a	6	61891321	61913221	21901	0.8348	5	ALOH	0	3
DG1136a	6	61913430	62114625	201196	0.6695	6	HET	1	2
DG1136a	6	62178705	62195719	17015	0.8923	5	ALOH	0	3
DG1136a	6	62199677	93533889	31334213	0.6279	6	HET	1	2
DG1136a	6	93536193	93543280	7088	0.6712	3	HET	1	1
DG1136a	6	93567779	135121662	41553884	0.6275	7	HET	1	2
DG1136a	6	135123836	135123836	1	0.7	3	HET	1	1
DG1136a	6	135129301	136595752	1466452	0.75	1	DLOH	0	1
DG1136a	6	136597262	136603107	5846	0.5306	3	HET	1	1
DG1136a	6	136606111	157183125	20577015	0.75	1	DLOH	0	1
DG1136a	6	157183559	157452959	269401	0.5882	3	HET	1	1
DG1136a	6	157459404	170878886	13419483	0.75	1	DLOH	0	1
DG1136a	6	170915395	170916297	903	0.5692	3	HET	1	1
DG1136a	6	170959019	171051203	92185	0.7273	2	NLOH	0	2
DG1136a	7	23912	35734	11823	0.6923	2	NLOH	0	2
DG1136a	7	39865	43555	3691	0.836	1	DLOH	0	1
DG1136a	7	43926	69010	25085	0.5926	3	HET	1	1
DG1136a	7	70245	5950246	5880002	0.7565	1	DLOH	0	1
DG1136a	7	5954955	6021626	66672	0.6759	4	NLOH	0	2
DG1136a	7	6022961	6192087	169127	0.75	1	DLOH	0	1
DG1136a	7	6198092	6783463	585372	0.5714	3	HET	1	1
DG1136a	7	6787377	6863540	76164	0.7832	4	NLOH	0	2
DG1136a	7	6877035	17145207	10268173	0.561	3	HET	1	1
DG1136a	7	17152048	17166395	14348	0.7876	3	HET	1	1
DG1136a	7	17171426	21764290	4592865	0.56	3	HET	1	1
DG1136a	7	21764330	21764604	275	0.8065	2	NLOH	0	2
DG1136a	7	21764921	27770599	6005679	0.5625	3	HET	1	1
DG1136a	7	27804669	27804688	20	0.9213	4	NLOH	0	2
DG1136a	7	27832358	45884081	18051724	0.5625	3	HET	1	1
DG1136a	7	45888273	45916488	28216	0.85	4	NLOH	0	2
DG1136a	7	45925041	48758355	2833315	0.5625	3	HET	1	1
DG1136a	7	48806329	48998280	191952	0.75	2	NLOH	0	2
DG1136a	7	49011853	53178762	4166910	0.5625	3	HET	1	1
DG1136a	7	53193398	53239002	45605	0.75	2	NLOH	0	2
DG1136a	7	53278366	56394983	3116618	0.5625	3	HET	1	1
DG1136a	7	56399819	56407224	7406	0.7667	4	NLOH	0	2
DG1136a	7	56407965	56558913	150949	0.5714	3	HET	1	1
DG1136a	7	56559765	56592589	32825	0.7193	4	NLOH	0	2
DG1136a	7	56675174	56857921	182748	0.6	3	HET	1	1
DG1136a	7	56869885	56879952	10068	0.619	3	HET	1	1
DG1136a	7	56900739	57058375	157637	0.68	2	NLOH	0	2
DG1136a	7	57077182	57178156	100975	0.6261	3	HET	1	1
DG1136a	7	57185605	57186102	498	0.8611	2	NLOH	0	2
DG1136a	7	57192774	57545758	352985	0.5641	3	HET	1	1
DG1136a	7	57545846	57552746	6901	0.6923	2	NLOH	0	2
DG1136a	7	57552762	57605815	53054	0.5866	3	HET	1	1
DG1136a	7	57605845	57639858	34014	0.72	4	NLOH	0	2
DG1136a	7	57639882	57647444	7563	0.5858	3	HET	1	1
DG1136a	7	57647484	57658208	10725	0.7308	2	NLOH	0	2
DG1136a	7	57658244	57658744	501	0.5238	3	HET	1	1
DG1136a	7	57658882	57662730	3849	0.6596	2	NLOH	0	2
DG1136a	7	57662841	57668590	5750	0.6	3	HET	1	1
DG1136a	7	57668766	57698192	29427	0.7136	4	NLOH	0	2
DG1136a	7	57698227	57698543	317	0.5738	3	HET	1	1
DG1136a	7	57698563	57768923	70361	0.7273	2	NLOH	0	2
DG1136a	7	57769120	57769435	316	0.5866	3	HET	1	1
DG1136a	7	57769762	57814597	44836	0.7029	2	NLOH	0	2
DG1136a	7	57814769	57883723	68955	0.5588	3	HET	1	1
DG1136a	7	57883830	57918426	34597	0.7224	2	NLOH	0	2
DG1136a	7	57918449	57918614	166	0.5538	3	HET	1	1
DG1136a	7	57918650	57925990	7341	0.7143	2	NLOH	0	2
DG1136a	7	57926402	57929165	2764	0.569	3	HET	1	1
DG1136a	7	57929173	57965493	36321	0.7037	4	NLOH	0	2
DG1136a	7	57965508	57981039	15532	0.5976	3	HET	1	1
DG1136a	7	57982927	57997772	14846	0.6882	2	NLOH	0	2
DG1136a	7	57998945	58034463	35519	0.5779	3	HET	1	1
DG1136a	7	58036841	61079506	3042666	0.6923	2	NLOH	0	2
DG1136a	7	61080154	61085307	5154	0.5968	3	HET	1	1
DG1136a	7	61085319	61090126	4808	0.754	2	NLOH	0	2
DG1136a	7	61091334	61097897	6564	0.5594	3	HET	1	1
DG1136a	7	61099317	61244496	145180	0.7439	2	NLOH	0	2
DG1136a	7	61245111	61382640	137530	0.5556	3	HET	1	1
DG1136a	7	61438650	61512362	73713	0.7	4	NLOH	0	2
DG1136a	7	61512399	61533518	21120	0.587	3	HET	1	1
DG1136a	7	61533556	61537545	3990	0.7143	2	NLOH	0	2
DG1136a	7	61538184	61670987	132804	0.5806	3	HET	1	1
DG1136a	7	61671090	61739977	68888	0.6667	2	NLOH	0	2
DG1136a	7	61740024	61752287	12264	0.6724	7	HET	1	2
DG1136a	7	61752423	61752932	510	0.7778	5	ALOH	0	3
DG1136a	7	61752951	61758879	5929	0.6479	7	HET	1	2
DG1136a	7	61759108	61762582	3475	0.7391	4	NLOH	0	2
DG1136a	7	61762742	61767073	4332	0.5577	3	HET	1	1
DG1136a	7	61767659	61768255	597	0.7584	2	NLOH	0	2
DG1136a	7	61768502	61779757	11256	0.5714	3	HET	1	1
DG1136a	7	61780141	61802841	22701	0.6721	6	HET	1	2
DG1136a	7	61803205	61816932	13728	0.6807	2	NLOH	0	2
DG1136a	7	61817479	61819175	1697	0.5907	3	HET	1	1
DG1136a	7	61819401	61836113	16713	0.6718	2	NLOH	0	2
DG1136a	7	61836234	61838421	2188	0.5692	3	HET	1	1
DG1136a	7	61838662	61850975	12314	0.6923	4	NLOH	0	2
DG1136a	7	61851470	61858339	6870	0.5714	3	HET	1	1
DG1136a	7	61858375	61862709	4335	0.7054	2	NLOH	0	2
DG1136a	7	61862807	61863367	561	0.582	3	HET	1	1
DG1136a	7	61863512	61865446	1935	0.7303	2	NLOH	0	2
DG1136a	7	61865567	61873230	7664	0.5531	3	HET	1	1
DG1136a	7	61873401	61878495	5095	0.7251	2	NLOH	0	2
DG1136a	7	61878669	61887342	8674	0.5806	3	HET	1	1
DG1136a	7	61887357	61892721	5365	0.7531	4	NLOH	0	2
DG1136a	7	61892983	61893438	456	0.5833	3	HET	1	1
DG1136a	7	61893463	61893576	114	0.7436	2	NLOH	0	2
DG1136a	7	61893613	61904090	10478	0.5693	3	HET	1	1
DG1136a	7	61904148	61909611	5464	0.72	2	NLOH	0	2
DG1136a	7	61909633	61913000	3368	0.5476	3	HET	1	1
DG1136a	7	61913177	61981305	68129	0.7381	4	NLOH	0	2
DG1136a	7	61981501	62027982	46482	0.5714	3	HET	1	1
DG1136a	7	62028520	62031335	2816	0.9686	2	NLOH	0	2
DG1136a	7	62031825	62341934	310110	0.5556	3	HET	1	1
DG1136a	7	62341955	62342134	180	0.7329	2	NLOH	0	2
DG1136a	7	62342363	62471660	129298	0.5641	3	HET	1	1
DG1136a	7	62472842	62474413	1572	0.7143	2	NLOH	0	2
DG1136a	7	62478815	62748750	269936	0.5617	3	HET	1	1
DG1136a	7	62748896	62750603	1708	0.8333	2	NLOH	0	2
DG1136a	7	62757533	62943597	186065	0.5714	3	HET	1	1
DG1136a	7	62946693	62989179	42487	0.7222	2	NLOH	0	2
DG1136a	7	62991602	63032361	40760	0.6163	3	HET	1	1
DG1136a	7	63033332	63074196	40865	0.7029	4	NLOH	0	2
DG1136a	7	63074447	63204090	129644	0.6229	3	HET	1	1
DG1136a	7	63205051	63232868	27818	0.56	3	HET	1	1
DG1136a	7	63233535	63236375	2841	0.7857	1	DLOH	0	1
DG1136a	7	63238263	63238635	373	0.6039	3	HET	1	1
DG1136a	7	63240808	64566009	1325202	0.5652	3	HET	1	1
DG1136a	7	64567308	64583964	16657	0.7441	2	NLOH	0	2
DG1136a	7	64594332	64959260	364929	0.5652	3	HET	1	1
DG1136a	7	64960031	65091300	131270	0.7197	2	NLOH	0	2
DG1136a	7	65092088	68391581	3299494	0.5667	3	HET	1	1
DG1136a	7	68414169	68418307	4139	0.8291	4	NLOH	0	2
DG1136a	7	68420521	72334062	3913542	0.5625	3	HET	1	1
DG1136a	7	72342384	72721556	379173	0.6923	2	NLOH	0	2
DG1136a	7	72765917	74140051	1374135	0.5714	3	HET	1	1
DG1136a	7	74142950	74283220	140271	0.7083	2	NLOH	0	2
DG1136a	7	74285969	75082230	796262	0.6	3	HET	1	1
DG1136a	7	75083167	75087150	3984	0.7696	4	NLOH	0	2
DG1136a	7	75089374	76056049	966676	0.5714	3	HET	1	1
DG1136a	7	76059561	76074564	15004	0.7	2	NLOH	0	2
DG1136a	7	76075098	76195173	120076	0.5963	3	HET	1	1
DG1136a	7	76195757	76214987	19231	0.6739	2	NLOH	0	2
DG1136a	7	76215092	76599824	384733	0.5862	3	HET	1	1
DG1136a	7	76601021	76694988	93968	0.6793	2	NLOH	0	2
DG1136a	7	76703452	80694313	3990862	0.5625	3	HET	1	1
DG1136a	7	80695420	80695577	158	0.836	2	NLOH	0	2
DG1136a	7	80695924	85812692	5116769	0.5625	3	HET	1	1
DG1136a	7	85826593	85826789	197	0.7689	2	NLOH	0	2
DG1136a	7	85826922	99878306	14051385	0.5641	3	HET	1	1
DG1136a	7	99880017	99883366	3350	0.8929	2	NLOH	0	2
DG1136a	7	99886509	100548273	661765	0.5714	3	HET	1	1
DG1136a	7	100548409	100549516	1108	0.775	2	NLOH	0	2
DG1136a	7	100549650	100550138	489	0.5357	3	HET	1	1
DG1136a	7	100550252	100552640	2389	0.6944	2	NLOH	0	2
DG1136a	7	100552644	100553435	792	0.55	3	HET	1	1
DG1136a	7	100553523	100613691	60169	0.6957	2	NLOH	0	2
DG1136a	7	100614317	100615281	965	0.597	3	HET	1	1
DG1136a	7	100615445	100643876	28432	0.7341	2	NLOH	0	2
DG1136a	7	100647553	100676409	28857	0.5714	3	HET	1	1
DG1136a	7	100677279	100678693	1415	0.8085	2	NLOH	0	2
DG1136a	7	100678740	102138771	1460032	0.5758	3	HET	1	1
DG1136a	7	102142876	102260427	117552	0.6842	2	NLOH	0	2
DG1136a	7	102266266	106271543	4005278	0.5625	3	HET	1	1
DG1136a	7	106271642	106272337	696	0.7619	2	NLOH	0	2
DG1136a	7	106272528	116671511	10398984	0.56	3	HET	1	1
DG1136a	7	116671533	116671838	306	0.8471	4	NLOH	0	2
DG1136a	7	116690077	125853688	9163612	0.5625	3	HET	1	1
DG1136a	7	125858059	125858576	518	0.7188	2	NLOH	0	2
DG1136a	7	125859728	128438392	2578665	0.5625	3	HET	1	1
DG1136a	7	128438526	128438588	63	0.7797	2	NLOH	0	2
DG1136a	7	128439166	131336483	2897318	0.5652	3	HET	1	1
DG1136a	7	131339259	131366297	27039	0.7519	2	NLOH	0	2
DG1136a	7	131468115	132276066	807952	0.5585	3	HET	1	1
DG1136a	7	132279769	132364322	84554	0.6835	4	NLOH	0	2
DG1136a	7	132367340	138303733	5936394	0.5625	3	HET	1	1
DG1136a	7	138305305	138307254	1950	0.7653	4	NLOH	0	2
DG1136a	7	138309274	142002172	3692899	0.5652	3	HET	1	1
DG1136a	7	142002713	142008653	5941	0.7621	2	NLOH	0	2
DG1136a	7	142009522	142042053	32532	0.5714	3	HET	1	1
DG1136a	7	142042652	142047160	4509	0.7518	4	NLOH	0	2
DG1136a	7	142047248	142108547	61300	0.5842	3	HET	1	1
DG1136a	7	142108696	142180995	72300	0.7407	2	NLOH	0	2
DG1136a	7	142187271	142457132	269862	0.5652	3	HET	1	1
DG1136a	7	142457674	142471805	14132	0.6809	2	NLOH	0	2
DG1136a	7	142472439	142476241	3803	0.5588	3	HET	1	1
DG1136a	7	142476594	142484723	8130	0.7692	2	NLOH	0	2
DG1136a	7	142486220	143199052	712833	0.5682	3	HET	1	1
DG1136a	7	143222042	143547810	325769	0.6448	2	NLOH	0	2
DG1136a	7	143564053	148023874	4459822	0.5625	3	HET	1	1
DG1136a	7	148027198	148028881	1684	0.6897	4	NLOH	0	2
DG1136a	7	148035676	148632720	597045	0.5625	3	HET	1	1
DG1136a	7	148633185	148633388	204	0.7381	2	NLOH	0	2
DG1136a	7	148633390	149695033	1061644	0.5714	3	HET	1	1
DG1136a	7	149695108	149701194	6087	0.6818	2	NLOH	0	2
DG1136a	7	149701318	151907327	2206010	0.5714	3	HET	1	1
DG1136a	7	151910860	151937641	26782	0.7943	2	NLOH	0	2
DG1136a	7	151939238	151945007	5770	0.5914	3	HET	1	1
DG1136a	7	151945140	151988622	43483	0.6831	2	NLOH	0	2
DG1136a	7	151988736	152052655	63920	0.5857	3	HET	1	1
DG1136a	7	152073861	152085552	11692	0.6969	2	NLOH	0	2
DG1136a	7	152085690	152085891	202	0.5577	3	HET	1	1
DG1136a	7	152085937	152098976	13040	0.7607	2	NLOH	0	2
DG1136a	7	152099017	152099123	107	0.7442	1	DLOH	0	1
DG1136a	7	152099149	152099402	254	0.6036	3	HET	1	1
DG1136a	7	152099408	152104134	4727	0.713	1	DLOH	0	1
DG1136a	7	152104157	152104624	468	0.6007	3	HET	1	1
DG1136a	7	152104629	152112018	7390	0.6972	1	DLOH	0	1
DG1136a	7	152112026	152112820	795	0.5859	3	HET	1	1
DG1136a	7	152112878	152113682	805	0.6724	1	DLOH	0	1
DG1136a	7	152123115	153690582	1567468	0.5714	3	HET	1	1
DG1136a	7	153691362	153760805	69444	0.683	2	NLOH	0	2
DG1136a	7	153763033	155126346	1363314	0.5641	3	HET	1	1
DG1136a	7	155126626	155128258	1633	0.7097	2	NLOH	0	2
DG1136a	7	155128669	155675596	546928	0.5676	3	HET	1	1
DG1136a	7	155683952	155727374	43423	0.7059	4	NLOH	0	2
DG1136a	7	155734388	157673544	1939157	0.5652	3	HET	1	1
DG1136a	7	157679499	157719847	40349	0.7285	4	NLOH	0	2
DG1136a	7	157725871	157939950	214080	0.5745	3	HET	1	1
DG1136a	7	157940201	157944193	3993	0.75	2	NLOH	0	2
DG1136a	7	157944447	158122307	177861	0.5667	3	HET	1	1
DG1136a	7	158122640	158165000	42361	0.7368	4	NLOH	0	2
DG1136a	7	158178830	158253883	75054	0.6061	3	HET	1	1
DG1136a	7	158254698	158261739	7042	0.6882	4	NLOH	0	2
DG1136a	7	158261753	158686626	424874	0.5714	3	HET	1	1
DG1136a	7	158686811	158686847	37	0.8	2	NLOH	0	2
DG1136a	7	158687998	158706650	18653	0.5299	3	HET	1	1
DG1136a	7	158708000	158708381	382	0.7347	2	NLOH	0	2
DG1136a	7	158708680	158922682	214003	0.5698	3	HET	1	1
DG1136a	7	158924928	158926180	1253	0.7585	4	NLOH	0	2
DG1136a	7	158927025	158957353	30329	0.5714	3	HET	1	1
DG1136a	7	158962687	158999815	37129	0.6579	4	NLOH	0	2
DG1136a	7	159001375	159128617	127243	0.5556	3	HET	1	1
DG1136a	8	11816	46604	34789	0.7241	2	NLOH	0	2
DG1136a	8	156768	160134	3367	0.875	1	DLOH	0	1
DG1136a	8	161222	162151	930	0.5797	3	HET	1	1
DG1136a	8	162218	2226833	2064616	0.75	1	DLOH	0	1
DG1136a	8	2227130	2231089	3960	0.6292	3	HET	1	1
DG1136a	8	2231394	6819487	4588094	0.75	1	DLOH	0	1
DG1136a	8	6829739	6847378	17640	0.6468	2	NLOH	0	2
DG1136a	8	6859751	7064771	205021	0.7419	1	DLOH	0	1
DG1136a	8	7103160	7111228	8069	0.8462	4	NLOH	0	2
DG1136a	8	7154058	7246652	92595	0.7143	1	DLOH	0	1
DG1136a	8	7256090	7925952	669863	0.6875	2	NLOH	0	2
DG1136a	8	7937179	7966280	29102	0.6654	1	DLOH	0	1
DG1136a	8	7994217	8071167	76951	0.7045	2	NLOH	0	2
DG1136a	8	8077290	11952698	3875409	0.75	1	DLOH	0	1
DG1136a	8	11963717	12084157	120441	0.7379	2	NLOH	0	2
DG1136a	8	12149078	12191602	42525	0.7846	1	DLOH	0	1
DG1136a	8	12199933	12202155	2223	0.7117	2	NLOH	0	2
DG1136a	8	12225443	12260128	34686	0.575	3	HET	1	1
DG1136a	8	12267950	12467942	199993	0.7358	4	NLOH	0	2
DG1136a	8	12468264	37712037	25243774	0.75	1	DLOH	0	1
DG1136a	8	37723366	43090789	5367424	0.5652	3	HET	1	1
DG1136a	8	43092977	43093450	474	0.7409	2	NLOH	0	2
DG1136a	8	43093766	43595842	502077	0.5588	3	HET	1	1
DG1136a	8	43597051	43728598	131548	0.5654	3	HET	1	1
DG1136a	8	43731886	43792571	60686	0.5572	3	HET	1	1
DG1136a	8	43793614	46839654	3046041	0.7115	2	NLOH	0	2
DG1136a	8	46839702	46839966	265	0.5405	3	HET	1	1
DG1136a	8	46839976	46856871	16896	0.7048	2	NLOH	0	2
DG1136a	8	46857798	55469539	8611742	0.5625	3	HET	1	1
DG1136a	8	55494321	55670027	175707	0.746	4	NLOH	0	2
DG1136a	8	55687587	58127431	2439845	0.561	3	HET	1	1
DG1136a	8	58127708	58128057	350	0.7674	2	NLOH	0	2
DG1136a	8	58145387	66040463	7895077	0.5625	3	HET	1	1
DG1136a	8	66044678	66058828	14151	0.8927	4	NLOH	0	2
DG1136a	8	66068313	67683050	1614738	0.56	3	HET	1	1
DG1136a	8	67684362	67684379	18	0.9465	4	NLOH	0	2
DG1136a	8	67713907	90024579	22310673	0.5614	3	HET	1	1
DG1136a	8	90027701	90081958	54258	0.7838	2	NLOH	0	2
DG1136a	8	90082694	97044004	6961311	0.5625	3	HET	1	1
DG1136a	8	97045284	97045284	1	0.5745	11	BCNA	2	2
DG1136a	8	97045605	108900086	11854482	0.7031	12	ASCNA	1	3
DG1136a	8	108901118	109035288	134171	0.6957	6	HET	1	2
DG1136a	8	109042944	111599271	2556328	0.7	10	ASCNA	1	3
DG1136a	8	111600446	112689328	1088883	0.7037	7	HET	1	2
DG1136a	8	112743905	112988570	244666	0.7009	12	ASCNA	1	3
DG1136a	8	113028608	115473414	2444807	0.6967	7	HET	1	2
DG1136a	8	115476931	115522336	45406	0.8158	5	ALOH	0	3
DG1136a	8	115524783	116472478	947696	0.7176	7	HET	1	2
DG1136a	8	116473505	116473523	19	0.8873	5	ALOH	0	3
DG1136a	8	116476393	118439086	1962694	0.7015	6	HET	1	2
DG1136a	8	118449203	118449214	12	0.9314	5	ALOH	0	3
DG1136a	8	118534256	120469789	1935534	0.7059	6	HET	1	2
DG1136a	8	120470013	120471581	1569	0.8529	5	ALOH	0	3
DG1136a	8	120473408	120485800	12393	0.7071	6	HET	1	2
DG1136a	8	120487241	120491914	4674	0.8458	5	ALOH	0	3
DG1136a	8	120491977	120509425	17449	0.7113	6	HET	1	2
DG1136a	8	120509468	120511424	1957	0.8032	5	ALOH	0	3
DG1136a	8	120511743	122064019	1552277	0.7007	6	HET	1	2
DG1136a	8	122064969	122068677	3709	0.8	5	ALOH	0	3
DG1136a	8	122068756	125422920	3354165	0.7037	6	HET	1	2
DG1136a	8	125423492	125424469	978	0.9148	5	ALOH	0	3
DG1136a	8	125424815	142265794	16840980	0.7027	6	HET	1	2
DG1136a	8	142266691	142400100	133410	0.7442	10	ASCNA	1	3
DG1136a	8	142400812	142408579	7768	0.8333	9	ALOH	0	4
DG1136a	8	142410460	142425325	14866	0.7419	12	ASCNA	1	3
DG1136a	8	142461139	143109421	648283	0.7021	7	HET	1	2
DG1136a	8	143110097	143116169	6073	0.7722	8	ALOH	0	3
DG1136a	8	143116851	143298371	181521	0.7	7	HET	1	2
DG1136a	8	143298775	143302166	3392	0.8121	8	ALOH	0	3
DG1136a	8	143302580	143913998	611419	0.7064	7	HET	1	2
DG1136a	8	143914335	143919441	5107	0.8113	5	ALOH	0	3
DG1136a	8	143919840	144153478	233639	0.7132	6	HET	1	2
DG1136a	8	144153551	144155272	1722	0.8101	5	ALOH	0	3
DG1136a	8	144155358	145991383	1836026	0.7045	6	HET	1	2
DG1136a	8	145992968	145994000	1033	0.8627	5	ALOH	0	3
DG1136a	8	145995663	146301025	305363	0.7143	6	HET	1	2
DG1136a	9	11720	46614	34895	0.7256	2	NLOH	0	2
DG1136a	9	46879	800601	753723	0.5714	3	HET	1	1
DG1136a	9	817457	817703	247	0.7674	4	NLOH	0	2
DG1136a	9	826656	17490965	16664310	0.56	3	HET	1	1
DG1136a	9	17507457	17623000	115544	0.8334	4	NLOH	0	2
DG1136a	9	17629471	30647523	13018053	0.56	3	HET	1	1
DG1136a	9	30657729	30689911	32183	0.875	2	NLOH	0	2
DG1136a	9	30724047	33383461	2659415	0.5625	3	HET	1	1
DG1136a	9	33384452	33403133	18682	0.7188	2	NLOH	0	2
DG1136a	9	33403470	33522908	119439	0.5613	3	HET	1	1
DG1136a	9	33523070	33523564	495	0.75	2	NLOH	0	2
DG1136a	9	33523597	36760736	3237140	0.5625	3	HET	1	1
DG1136a	9	36764306	36764678	373	0.8548	2	NLOH	0	2
DG1136a	9	36765045	40036528	3271484	0.5714	3	HET	1	1
DG1136a	9	40053857	40422020	368164	0.6842	2	NLOH	0	2
DG1136a	9	40482839	40675256	192418	0.5833	3	HET	1	1
DG1136a	9	40713711	41981224	1267514	0.6875	2	NLOH	0	2
DG1136a	9	42077323	42317707	240385	0.6	3	HET	1	1
DG1136a	9	42341650	43873143	1531494	0.6957	4	NLOH	0	2
DG1136a	9	43910752	44176804	266053	0.6207	3	HET	1	1
DG1136a	9	44180232	44185782	5551	0.7436	2	NLOH	0	2
DG1136a	9	44193407	44739764	546358	0.5963	3	HET	1	1
DG1136a	9	44740079	45643259	903181	0.7	4	NLOH	0	2
DG1136a	9	45670815	45729178	58364	0.5789	3	HET	1	1
DG1136a	9	45729284	66248022	20518739	0.6629	2	NLOH	0	2
DG1136a	9	66251345	66314464	63120	0.5843	3	HET	1	1
DG1136a	9	66329118	66454956	125839	0.6842	2	NLOH	0	2
DG1136a	9	66455108	66455115	8	0.52	3	HET	1	1
DG1136a	9	66455154	66459588	4435	0.7493	2	NLOH	0	2
DG1136a	9	66459988	66460084	97	0.5189	3	HET	1	1
DG1136a	9	66460186	66462352	2167	0.7337	2	NLOH	0	2
DG1136a	9	66462446	66462941	496	0.5755	3	HET	1	1
DG1136a	9	66462951	66463725	775	0.6832	4	NLOH	0	2
DG1136a	9	66463809	66463960	152	0.5766	3	HET	1	1
DG1136a	9	66464019	66477807	13789	0.6954	2	NLOH	0	2
DG1136a	9	66477845	66478301	457	0.5183	3	HET	1	1
DG1136a	9	66478361	66491286	12926	0.6939	2	NLOH	0	2
DG1136a	9	66491434	66491811	378	0.5849	3	HET	1	1
DG1136a	9	66492059	66795999	303941	0.7157	2	NLOH	0	2
DG1136a	9	66796254	66797884	1631	0.5556	3	HET	1	1
DG1136a	9	66797916	66820736	22821	0.6667	2	NLOH	0	2
DG1136a	9	66820796	66821026	231	0.5626	3	HET	1	1
DG1136a	9	66821038	66821240	203	0.7311	2	NLOH	0	2
DG1136a	9	66821242	66821352	111	0.5426	3	HET	1	1
DG1136a	9	66821368	67293304	471937	0.7143	2	NLOH	0	2
DG1136a	9	67293649	67320806	27158	0.6	3	HET	1	1
DG1136a	9	67320828	68346730	1025903	0.6869	4	NLOH	0	2
DG1136a	9	68346825	68350033	3209	0.5435	3	HET	1	1
DG1136a	9	68350460	68351517	1058	0.6667	2	NLOH	0	2
DG1136a	9	68351604	68352929	1326	0.5806	3	HET	1	1
DG1136a	9	68352973	68354318	1346	0.7584	2	NLOH	0	2
DG1136a	9	68354530	68356415	1886	0.5824	3	HET	1	1
DG1136a	9	68356449	68378079	21631	0.734	4	NLOH	0	2
DG1136a	9	68378354	68378598	245	0.5441	3	HET	1	1
DG1136a	9	68378606	68383373	4768	0.7241	2	NLOH	0	2
DG1136a	9	68383389	68386702	3314	0.5849	3	HET	1	1
DG1136a	9	68386775	68387520	746	0.6923	2	NLOH	0	2
DG1136a	9	68387578	68390180	2603	0.6	3	HET	1	1
DG1136a	9	68390195	68400354	10160	0.6739	2	NLOH	0	2
DG1136a	9	68400432	68401128	697	0.602	3	HET	1	1
DG1136a	9	68401151	68404877	3727	0.6763	2	NLOH	0	2
DG1136a	9	68405210	68406362	1153	0.5652	3	HET	1	1
DG1136a	9	68406398	68413832	7435	0.7092	4	NLOH	0	2
DG1136a	9	68413846	68414172	327	0.5839	3	HET	1	1
DG1136a	9	68415852	68419454	3603	0.6269	4	NLOH	0	2
DG1136a	9	68419481	68419773	293	0.5843	3	HET	1	1
DG1136a	9	68419787	68422682	2896	0.7434	2	NLOH	0	2
DG1136a	9	68422753	68426706	3954	0.5168	3	HET	1	1
DG1136a	9	68426717	68431580	4864	0.674	2	NLOH	0	2
DG1136a	9	68431789	68432003	215	0.5778	3	HET	1	1
DG1136a	9	68432320	68433043	724	0.7	4	NLOH	0	2
DG1136a	9	68433060	68433620	561	0.5913	3	HET	1	1
DG1136a	9	68433641	68745483	311843	0.7035	2	NLOH	0	2
DG1136a	9	68745652	68989111	243460	0.6132	3	HET	1	1
DG1136a	9	68989360	69000062	10703	0.6614	2	NLOH	0	2
DG1136a	9	69000066	69011812	11747	0.6	3	HET	1	1
DG1136a	9	69011823	69232164	220342	0.7	4	NLOH	0	2
DG1136a	9	69238176	69643111	404936	0.6415	3	HET	1	1
DG1136a	9	69656230	69989668	333439	0.7292	2	NLOH	0	2
DG1136a	9	69989677	70010427	20751	0.6	3	HET	1	1
DG1136a	9	70065217	70931983	866767	0.7059	2	NLOH	0	2
DG1136a	9	70932002	76659915	5727914	0.5636	3	HET	1	1
DG1136a	9	76660679	76660749	71	0.7778	2	NLOH	0	2
DG1136a	9	76660755	90728613	14067859	0.5625	3	HET	1	1
DG1136a	9	90728838	90770536	41699	0.7143	2	NLOH	0	2
DG1136a	9	90778409	91263679	485271	0.5714	3	HET	1	1
DG1136a	9	91274342	91274577	236	0.7241	2	NLOH	0	2
DG1136a	9	91276626	95971009	4694384	0.5625	3	HET	1	1
DG1136a	9	95971043	95973607	2565	0.7429	2	NLOH	0	2
DG1136a	9	95976263	99979232	4002970	0.5676	3	HET	1	1
DG1136a	9	99979746	99987192	7447	0.7585	2	NLOH	0	2
DG1136a	9	99992496	101473404	1480909	0.5714	3	HET	1	1
DG1136a	9	101476615	101476883	269	0.7755	2	NLOH	0	2
DG1136a	9	101477290	116136155	14658866	0.5625	3	HET	1	1
DG1136a	9	116139835	116140760	926	0.7958	4	NLOH	0	2
DG1136a	9	116140972	127997682	11856711	0.5625	3	HET	1	1
DG1136a	9	128002003	128027951	25949	0.8889	4	NLOH	0	2
DG1136a	9	128115941	131506638	3390698	0.5676	3	HET	1	1
DG1136a	9	131510347	131619450	109104	0.6452	6	HET	1	2
DG1136a	9	131620132	132172446	552315	0.5763	3	HET	1	1
DG1136a	9	132172618	132172887	270	0.7742	2	NLOH	0	2
DG1136a	9	132173234	132189828	16595	0.5917	3	HET	1	1
DG1136a	9	132190011	132205762	15752	0.9083	2	NLOH	0	2
DG1136a	9	132208834	133823473	1614640	0.5714	3	HET	1	1
DG1136a	9	133830478	133847824	17347	0.6755	2	NLOH	0	2
DG1136a	9	133849498	136127764	2278267	0.5676	3	HET	1	1
DG1136a	9	136130200	136130543	344	0.7705	2	NLOH	0	2
DG1136a	9	136133148	137639051	1505904	0.5769	3	HET	1	1
DG1136a	9	137639542	137640130	589	0.7627	4	NLOH	0	2
DG1136a	9	137642478	137738895	96418	0.5698	3	HET	1	1
DG1136a	9	137740841	137744401	3561	0.6778	4	NLOH	0	2
DG1136a	9	137762081	139994947	2232867	0.5714	3	HET	1	1
DG1136a	9	139996619	139998042	1424	0.74	2	NLOH	0	2
DG1136a	9	139998693	140201433	202741	0.5667	3	HET	1	1
DG1136a	9	140213975	140222920	8946	0.6933	2	NLOH	0	2
DG1136a	9	140224275	141078304	854030	0.5858	3	HET	1	1
DG1136a	9	141081217	141085695	4479	0.7446	2	NLOH	0	2
DG1136a	9	141087249	141148943	61695	0.5833	3	HET	1	1
DG1136a	10	68575	7122366	7053792	0.5714	6	HET	1	2
DG1136a	10	7123422	7413879	290458	0.6063	11	BCNA	2	2
DG1136a	10	7423490	7497425	73936	0.66	12	ASCNA	1	3
DG1136a	10	7497722	7561276	63555	0.6	11	BCNA	2	2
DG1136a	10	7561902	7632504	70603	0.6262	12	ASCNA	1	3
DG1136a	10	7632586	7655665	23080	0.5882	11	BCNA	2	2
DG1136a	10	7670494	7778749	108256	0.6667	12	ASCNA	1	3
DG1136a	10	7780785	8037784	257000	0.5957	11	BCNA	2	2
DG1136a	10	8045422	8130321	84900	0.5811	7	HET	1	2
DG1136a	10	8165291	9513982	1348692	0.597	11	BCNA	2	2
DG1136a	10	9514023	9610850	96828	0.6355	10	ASCNA	1	3
DG1136a	10	9614075	10142076	528002	0.5962	11	BCNA	2	2
DG1136a	10	10144741	10353350	208610	0.6626	12	ASCNA	1	3
DG1136a	10	10354141	11313918	959778	0.6	11	BCNA	2	2
DG1136a	10	11314769	11339009	24241	0.6306	12	ASCNA	1	3
DG1136a	10	11339811	11399072	59262	0.5882	11	BCNA	2	2
DG1136a	10	11401130	11423457	22328	0.6562	10	ASCNA	1	3
DG1136a	10	11424595	11973483	548889	0.5556	11	BCNA	2	2
DG1136a	10	11975662	12006358	30697	0.6588	12	ASCNA	1	3
DG1136a	10	12008995	13280931	1271937	0.6	7	HET	1	2
DG1136a	10	13283573	13283670	98	0.8537	5	ALOH	0	3
DG1136a	10	13283708	18839779	5556072	0.6032	6	HET	1	2
DG1136a	10	18840433	18861275	20843	0.5942	11	BCNA	2	2
DG1136a	10	18862211	26915712	8053502	0.6	6	HET	1	2
DG1136a	10	26916877	26917507	631	0.8056	5	ALOH	0	3
DG1136a	10	26921756	31910043	4988288	0.6042	7	HET	1	2
DG1136a	10	31915467	32247876	332410	0.5932	11	BCNA	2	2
DG1136a	10	32248301	32320869	72569	0.6371	10	ASCNA	1	3
DG1136a	10	32322452	33107746	785295	0.6	11	BCNA	2	2
DG1136a	10	33110148	33117425	7278	0.7125	10	ASCNA	1	3
DG1136a	10	33119940	34644474	1524535	0.5625	6	HET	1	2
DG1136a	10	34665197	34669404	4208	0.591	3	HET	1	1
DG1136a	10	34673746	38561543	3887798	0.6875	2	NLOH	0	2
DG1136a	10	38561766	38566790	5025	0.6	3	HET	1	1
DG1136a	10	38566877	38568056	1180	0.7489	2	NLOH	0	2
DG1136a	10	38568178	38569538	1361	0.5882	3	HET	1	1
DG1136a	10	38569619	38773450	203832	0.6765	4	NLOH	0	2
DG1136a	10	38774024	38774877	854	0.6052	3	HET	1	1
DG1136a	10	38775214	38888795	113582	0.6786	7	HET	1	2
DG1136a	10	38889553	38889553	1	0.5833	3	HET	1	1
DG1136a	10	38889797	38974333	84537	0.6875	2	NLOH	0	2
DG1136a	10	38974485	38981580	7096	0.5836	3	HET	1	1
DG1136a	10	38981694	39075616	93923	0.6818	4	NLOH	0	2
DG1136a	10	39076581	39077614	1034	0.7722	8	ALOH	0	3
DG1136a	10	39077818	39154899	77082	0.6875	6	HET	1	2
DG1136a	10	42355461	42356631	1171	0.8045	4	NLOH	0	2
DG1136a	10	42356635	42358098	1464	0.5614	3	HET	1	1
DG1136a	10	42358462	42358989	528	0.6928	4	NLOH	0	2
DG1136a	10	42359039	42359329	291	0.5906	3	HET	1	1
DG1136a	10	42359380	42360608	1229	0.6903	4	NLOH	0	2
DG1136a	10	42360636	42360932	297	0.5676	3	HET	1	1
DG1136a	10	42360974	42361069	96	0.7121	4	NLOH	0	2
DG1136a	10	42361093	42361430	338	0.5765	3	HET	1	1
DG1136a	10	42361440	42363143	1704	0.6948	2	NLOH	0	2
DG1136a	10	42363162	42363674	513	0.5442	3	HET	1	1
DG1136a	10	42363685	42380113	16429	0.7143	4	NLOH	0	2
DG1136a	10	42380138	42380980	843	0.6226	3	HET	1	1
DG1136a	10	42381010	42397119	16110	0.6287	7	HET	1	2
DG1136a	10	42398133	42398233	101	0.8846	8	ALOH	0	3
DG1136a	10	42398502	42399035	534	0.65	7	HET	1	2
DG1136a	10	42399414	42401039	1626	0.8641	8	ALOH	0	3
DG1136a	10	42401048	42405539	4492	0.6333	7	HET	1	2
DG1136a	10	42405781	42406999	1219	1	5	ALOH	0	3
DG1136a	10	42407098	42525497	118400	0.7419	1	DLOH	0	1
DG1136a	10	42526422	42598663	72242	0.8333	2	NLOH	0	2
DG1136a	10	42598764	42599534	771	0.5491	3	HET	1	1
DG1136a	10	42600080	42601563	1484	0.6899	2	NLOH	0	2
DG1136a	10	42601940	42602586	647	0.5506	3	HET	1	1
DG1136a	10	42602596	42655299	52704	0.7381	2	NLOH	0	2
DG1136a	10	42655382	42655867	486	0.5556	3	HET	1	1
DG1136a	10	42655880	42704199	48320	0.7045	2	NLOH	0	2
DG1136a	10	42704287	42712685	8399	0.5757	3	HET	1	1
DG1136a	10	42712784	42781795	69012	0.7037	2	NLOH	0	2
DG1136a	10	42784062	42790630	6569	0.5917	3	HET	1	1
DG1136a	10	42793129	42816980	23852	0.6667	6	HET	1	2
DG1136a	10	42819422	42821007	1586	0.6334	3	HET	1	1
DG1136a	10	42821954	46134013	3312060	0.7	2	NLOH	0	2
DG1136a	10	46141515	46953042	811528	0.7273	1	DLOH	0	1
DG1136a	10	46953216	46972854	19639	0.6	3	HET	1	1
DG1136a	10	46973563	46975566	2004	0.8119	1	DLOH	0	1
DG1136a	10	46975719	47010495	34777	0.5686	3	HET	1	1
DG1136a	10	47011212	47026417	15206	0.6992	1	DLOH	0	1
DG1136a	10	47026608	47059350	32743	0.5752	3	HET	1	1
DG1136a	10	47059459	47106169	46711	0.7273	1	DLOH	0	1
DG1136a	10	47106370	47107704	1335	0.5775	3	HET	1	1
DG1136a	10	47107920	47132978	25059	0.656	1	DLOH	0	1
DG1136a	10	47133114	47160125	27012	0.5745	3	HET	1	1
DG1136a	10	47333488	51595820	4262333	0.75	1	DLOH	0	1
DG1136a	10	51605564	51623061	17498	0.5963	3	HET	1	1
DG1136a	10	51627326	54276543	2649218	0.75	1	DLOH	0	1
DG1136a	10	54279024	54279024	1	0.6176	3	HET	1	1
DG1136a	10	54283768	56539246	2255479	0.5641	3	HET	1	1
DG1136a	10	56546621	56556050	9430	0.8649	2	NLOH	0	2
DG1136a	10	56615458	67556104	10940647	0.561	3	HET	1	1
DG1136a	10	67580741	67594391	13651	0.541	3	HET	1	1
DG1136a	10	67595447	77715925	10120479	0.5636	3	HET	1	1
DG1136a	10	77730028	79709725	1979698	0.625	6	HET	1	2
DG1136a	10	79710529	81990546	2280018	0.5667	3	HET	1	1
DG1136a	10	81991401	81996432	5032	0.7222	2	NLOH	0	2
DG1136a	10	81999914	84190324	2190411	0.5625	3	HET	1	1
DG1136a	10	84191720	84191720	1	0.5405	3	HET	1	1
DG1136a	10	84195766	101640920	17445155	0.75	1	DLOH	0	1
DG1136a	10	101654322	103474878	1820557	0.5667	3	HET	1	1
DG1136a	10	103488124	103488723	600	0.6571	2	NLOH	0	2
DG1136a	10	103490837	105078793	1587957	0.5638	3	HET	1	1
DG1136a	10	105079162	105079439	278	0.6661	3	HET	1	1
DG1136a	10	105084207	133846354	28762148	0.75	1	DLOH	0	1
DG1136a	10	133896589	133968063	71475	0.5714	3	HET	1	1
DG1136a	10	133968387	133968572	186	0.6974	2	NLOH	0	2
DG1136a	10	133969226	134608216	638991	0.5797	3	HET	1	1
DG1136a	10	134634499	135455413	820915	0.7	2	NLOH	0	2
DG1136a	10	135455480	135461981	6502	0.6053	3	HET	1	1
DG1136a	10	135462046	135524731	62686	0.7273	4	NLOH	0	2
DG1136a	11	132326	132326	1	0.625	2	NLOH	0	2
DG1136a	11	177835	186771	8937	0.7857	1	DLOH	0	1
DG1136a	11	186820	190688	3869	0.6042	3	HET	1	1
DG1136a	11	190699	190790	92	0.7448	1	DLOH	0	1
DG1136a	11	190838	191319	482	0.5433	3	HET	1	1
DG1136a	11	191428	933467	742040	0.75	1	DLOH	0	1
DG1136a	11	980364	1017113	36750	0.7191	2	NLOH	0	2
DG1136a	11	1017154	1018166	1013	0.5789	3	HET	1	1
DG1136a	11	1018200	1065791	47592	0.7917	2	NLOH	0	2
DG1136a	11	1066044	9749894	8683851	0.75	1	DLOH	0	1
DG1136a	11	9821570	18146712	8325143	0.5625	3	HET	1	1
DG1136a	11	18174947	18258825	83879	0.5806	3	HET	1	1
DG1136a	11	18262288	18943863	681576	0.561	3	HET	1	1
DG1136a	11	18945239	18963957	18719	0.6725	4	NLOH	0	2
DG1136a	11	18963995	18984801	20807	0.5806	3	HET	1	1
DG1136a	11	18986179	18986450	272	0.8163	2	NLOH	0	2
DG1136a	11	18986882	33419482	14432601	0.561	3	HET	1	1
DG1136a	11	33424798	33424893	96	0.7547	2	NLOH	0	2
DG1136a	11	33446901	47363285	13916385	0.561	3	HET	1	1
DG1136a	11	47370957	47392848	21892	0.7836	2	NLOH	0	2
DG1136a	11	47392872	48340511	947640	0.56	3	HET	1	1
DG1136a	11	48340588	48341840	1253	0.675	2	NLOH	0	2
DG1136a	11	48341858	48343301	1444	0.5753	3	HET	1	1
DG1136a	11	48343322	48344866	1545	0.7258	2	NLOH	0	2
DG1136a	11	48344965	48345179	215	0.5484	3	HET	1	1
DG1136a	11	48345204	48346010	807	0.7547	2	NLOH	0	2
DG1136a	11	48346076	48347867	1792	0.5591	3	HET	1	1
DG1136a	11	48347877	48351133	3257	0.7104	2	NLOH	0	2
DG1136a	11	48351186	48353689	2504	0.5881	3	HET	1	1
DG1136a	11	48353820	48355859	2040	0.7236	2	NLOH	0	2
DG1136a	11	48355936	48356710	775	0.5918	3	HET	1	1
DG1136a	11	48356757	48357408	652	0.7328	2	NLOH	0	2
DG1136a	11	48357492	48359556	2065	0.5694	3	HET	1	1
DG1136a	11	48359704	48363688	3985	0.6825	2	NLOH	0	2
DG1136a	11	48363752	48374104	10353	0.5686	3	HET	1	1
DG1136a	11	48374130	48374735	606	0.6735	2	NLOH	0	2
DG1136a	11	48374807	48376503	1697	0.5763	3	HET	1	1
DG1136a	11	48376532	48377793	1262	0.7374	2	NLOH	0	2
DG1136a	11	48377885	48384626	6742	0.589	3	HET	1	1
DG1136a	11	48384676	48385214	539	0.7195	2	NLOH	0	2
DG1136a	11	48385241	48387424	2184	0.5775	3	HET	1	1
DG1136a	11	48387490	48388782	1293	0.766	2	NLOH	0	2
DG1136a	11	48389838	48809669	419832	0.5625	3	HET	1	1
DG1136a	11	48810016	48811348	1333	0.9333	2	NLOH	0	2
DG1136a	11	48811550	48817907	6358	0.5778	3	HET	1	1
DG1136a	11	48817916	48818175	260	0.6951	2	NLOH	0	2
DG1136a	11	48818239	48843975	25737	0.56	3	HET	1	1
DG1136a	11	48844516	48847477	2962	0.791	2	NLOH	0	2
DG1136a	11	48848823	48856726	7904	0.5152	3	HET	1	1
DG1136a	11	48857506	48858053	548	0.7649	2	NLOH	0	2
DG1136a	11	48858852	48878403	19552	0.5736	3	HET	1	1
DG1136a	11	48878787	48882985	4199	0.7006	4	NLOH	0	2
DG1136a	11	48883136	48948373	65238	0.5741	3	HET	1	1
DG1136a	11	48948543	48962703	14161	0.6667	2	NLOH	0	2
DG1136a	11	48962708	48962853	146	0.5524	3	HET	1	1
DG1136a	11	48962876	48963881	1006	0.716	2	NLOH	0	2
DG1136a	11	48963914	50716068	1752155	0.5641	3	HET	1	1
DG1136a	11	50716382	50726806	10425	0.6481	2	NLOH	0	2
DG1136a	11	50726828	50727040	213	0.5507	3	HET	1	1
DG1136a	11	50727088	50745592	18505	0.7037	2	NLOH	0	2
DG1136a	11	50745612	50763318	17707	0.5901	3	HET	1	1
DG1136a	11	50764129	50764169	41	0.8814	2	NLOH	0	2
DG1136a	11	50764511	51568702	804192	0.5614	3	HET	1	1
DG1136a	11	51568714	51569007	294	0.712	4	NLOH	0	2
DG1136a	11	51569023	51569903	881	0.5891	3	HET	1	1
DG1136a	11	51569921	51570084	164	0.6784	4	NLOH	0	2
DG1136a	11	51570195	51570595	401	0.5725	3	HET	1	1
DG1136a	11	51570651	51575206	4556	0.6953	2	NLOH	0	2
DG1136a	11	51575254	51578628	3375	0.593	3	HET	1	1
DG1136a	11	51578637	51580014	1378	0.7727	4	NLOH	0	2
DG1136a	11	51580032	51580404	373	0.5611	3	HET	1	1
DG1136a	11	51580423	51590621	10199	0.697	2	NLOH	0	2
DG1136a	11	51590807	51590954	148	0.5586	3	HET	1	1
DG1136a	11	51590980	51591307	328	0.6946	4	NLOH	0	2
DG1136a	11	51591352	56436629	4845278	0.5676	3	HET	1	1
DG1136a	11	56443825	56468111	24287	0.6968	2	NLOH	0	2
DG1136a	11	56468198	56468720	523	0.5917	3	HET	1	1
DG1136a	11	56468828	56473340	4513	0.6667	2	NLOH	0	2
DG1136a	11	56480545	58836780	2356236	0.5625	3	HET	1	1
DG1136a	11	58837363	58865730	28368	0.7556	3	HET	1	1
DG1136a	11	58913442	60866389	1952948	0.6	3	HET	1	1
DG1136a	11	60866859	61026024	159166	0.6667	2	NLOH	0	2
DG1136a	11	61056791	62458663	1401873	0.6057	3	HET	1	1
DG1136a	11	62472049	62484739	12691	0.731	4	NLOH	0	2
DG1136a	11	62489961	62910030	420070	0.6066	3	HET	1	1
DG1136a	11	62910117	62914192	4076	0.6985	4	NLOH	0	2
DG1136a	11	62916058	64312698	1396641	0.6087	3	HET	1	1
DG1136a	11	64317595	64385224	67630	0.7143	4	NLOH	0	2
DG1136a	11	64397491	67001016	2603526	0.6154	3	HET	1	1
DG1136a	11	67001035	67165622	164588	0.726	2	NLOH	0	2
DG1136a	11	67176972	67416963	239992	0.5714	3	HET	1	1
DG1136a	11	67422553	67452590	30038	0.8044	2	NLOH	0	2
DG1136a	11	67453420	67543612	90193	0.5917	3	HET	1	1
DG1136a	11	67543786	67548666	4881	0.7702	2	NLOH	0	2
DG1136a	11	67550197	67599548	49352	0.6117	3	HET	1	1
DG1136a	11	67600490	67640247	39758	0.6923	4	NLOH	0	2
DG1136a	11	67640910	68731122	1090213	0.6047	3	HET	1	1
DG1136a	11	68731485	68731535	51	0.7664	4	NLOH	0	2
DG1136a	11	68731551	68932899	201349	0.6098	3	HET	1	1
DG1136a	11	68933696	68950670	16975	0.7883	2	NLOH	0	2
DG1136a	11	68955198	69079134	123937	0.625	3	HET	1	1
DG1136a	11	69081182	69141238	60057	0.683	4	NLOH	0	2
DG1136a	11	69142102	70212785	1070684	0.6102	3	HET	1	1
DG1136a	11	70217399	70217596	198	0.6957	2	NLOH	0	2
DG1136a	11	70217622	71273517	1055896	0.6111	3	HET	1	1
DG1136a	11	71274671	71280333	5663	0.7166	2	NLOH	0	2
DG1136a	11	71281168	71301227	20060	0.6341	3	HET	1	1
DG1136a	11	71301793	71306606	4814	0.725	2	NLOH	0	2
DG1136a	11	71306701	71526834	220134	0.6364	3	HET	1	1
DG1136a	11	71527458	71545835	18378	0.6818	2	NLOH	0	2
DG1136a	11	71546346	71872990	326645	0.6047	3	HET	1	1
DG1136a	11	71885867	71912818	26952	0.7143	2	NLOH	0	2
DG1136a	11	71926660	76273526	4346867	0.6087	3	HET	1	1
DG1136a	11	76273855	76277075	3221	0.6916	2	NLOH	0	2
DG1136a	11	76277547	76880518	602972	0.6071	3	HET	1	1
DG1136a	11	76881067	76908732	27666	0.689	4	NLOH	0	2
DG1136a	11	76909427	85222684	8313258	0.6071	3	HET	1	1
DG1136a	11	85325376	85655613	330238	0.6583	2	NLOH	0	2
DG1136a	11	85683116	85983130	300015	0.6129	3	HET	1	1
DG1136a	11	85983138	86027053	43916	0.75	4	NLOH	0	2
DG1136a	11	86028539	88503890	2475352	0.6	3	HET	1	1
DG1136a	11	88527434	88821833	294400	0.7107	4	NLOH	0	2
DG1136a	11	88837005	89475148	638144	0.603	3	HET	1	1
DG1136a	11	89483332	89842613	359282	0.6957	2	NLOH	0	2
DG1136a	11	89843151	91770782	1927632	0.6053	3	HET	1	1
DG1136a	11	91781387	91898694	117308	0.7372	4	NLOH	0	2
DG1136a	11	91913165	96447394	4534230	0.6058	3	HET	1	1
DG1136a	11	96457447	96457786	340	0.8913	2	NLOH	0	2
DG1136a	11	96458066	102570215	6112150	0.6042	3	HET	1	1
DG1136a	11	102570760	102602091	31332	0.7	2	NLOH	0	2
DG1136a	11	102606130	107194266	4588137	0.6042	3	HET	1	1
DG1136a	11	107194482	107197256	2775	0.7285	2	NLOH	0	2
DG1136a	11	107197319	113818463	6621145	0.6078	3	HET	1	1
DG1136a	11	113819452	113860425	40974	0.6961	4	NLOH	0	2
DG1136a	11	113862968	114248230	385263	0.6111	3	HET	1	1
DG1136a	11	114248728	114283896	35169	0.6727	4	NLOH	0	2
DG1136a	11	114284744	114416967	132224	0.6075	3	HET	1	1
DG1136a	11	114417428	114420240	2813	0.73	2	NLOH	0	2
DG1136a	11	114420264	114421118	855	0.5775	3	HET	1	1
DG1136a	11	114421167	114423629	2463	0.7416	4	NLOH	0	2
DG1136a	11	114423644	114423879	236	0.5197	3	HET	1	1
DG1136a	11	114423920	114432175	8256	0.7111	2	NLOH	0	2
DG1136a	11	114432239	118225452	3793214	0.6078	3	HET	1	1
DG1136a	11	118226011	118228114	2104	0.7015	2	NLOH	0	2
DG1136a	11	118228624	121049690	2821067	0.6058	3	HET	1	1
DG1136a	11	121052183	121056860	4678	0.8103	2	NLOH	0	2
DG1136a	11	121057430	128735666	7678237	0.5714	3	HET	1	1
DG1136a	11	128737188	133925372	5188185	0.5952	7	HET	1	2
DG1136a	11	133925402	133925656	255	0.8816	5	ALOH	0	3
DG1136a	11	133926704	134939568	1012865	0.5556	6	HET	1	2
DG1136a	12	65309	92920	27612	0.64	6	HET	1	2
DG1136a	12	93244	169662	76419	0.6	3	HET	1	1
DG1136a	12	169701	170131	431	0.75	2	NLOH	0	2
DG1136a	12	174659	6997266	6822608	0.75	1	DLOH	0	1
DG1136a	12	7002387	7002479	93	0.5333	3	HET	1	1
DG1136a	12	7002605	8377941	1375337	0.7647	1	DLOH	0	1
DG1136a	12	8378052	8388890	10839	0.5946	3	HET	1	1
DG1136a	12	8389625	9586746	1197122	0.75	1	DLOH	0	1
DG1136a	12	9593425	9731145	137721	0.7727	2	NLOH	0	2
DG1136a	12	9734816	11225628	1490813	0.75	1	DLOH	0	1
DG1136a	12	11225794	11244687	18894	0.6132	3	HET	1	1
DG1136a	12	11250893	11515932	265040	0.7419	1	DLOH	0	1
DG1136a	12	11517052	11535981	18930	0.5814	3	HET	1	1
DG1136a	12	11539619	23465816	11926198	0.75	1	DLOH	0	1
DG1136a	12	23472203	23472203	1	0.55	3	HET	1	1
DG1136a	12	23503894	25955370	2451477	0.5652	3	HET	1	1
DG1136a	12	25956542	25957785	1244	0.7166	2	NLOH	0	2
DG1136a	12	25960694	34323895	8363202	0.5641	3	HET	1	1
DG1136a	12	34324700	34341854	17155	0.7238	2	NLOH	0	2
DG1136a	12	34343752	34441949	98198	0.5714	3	HET	1	1
DG1136a	12	34443072	34531965	88894	0.5556	3	HET	1	1
DG1136a	12	34532284	34830714	298431	0.5605	3	HET	1	1
DG1136a	12	34830914	34838354	7441	0.7231	2	NLOH	0	2
DG1136a	12	34838461	37858157	3019697	0.5769	3	HET	1	1
DG1136a	12	37858731	37881735	23005	0.7233	2	NLOH	0	2
DG1136a	12	37882982	37898543	15562	0.5732	3	HET	1	1
DG1136a	12	37898636	37901601	2966	0.7416	2	NLOH	0	2
DG1136a	12	37901629	37991170	89542	0.575	3	HET	1	1
DG1136a	12	37994590	38016321	21732	0.6857	4	NLOH	0	2
DG1136a	12	38016343	38049900	33558	0.5741	3	HET	1	1
DG1136a	12	38049938	38051839	1902	0.7143	2	NLOH	0	2
DG1136a	12	38052444	38082955	30512	0.5556	3	HET	1	1
DG1136a	12	38083611	38084817	1207	0.7504	2	NLOH	0	2
DG1136a	12	38087536	38096210	8675	0.5526	3	HET	1	1
DG1136a	12	38097032	38115493	18462	0.6279	4	NLOH	0	2
DG1136a	12	38115512	38121928	6417	0.5811	3	HET	1	1
DG1136a	12	38122092	38135724	13633	0.659	4	NLOH	0	2
DG1136a	12	38137537	38576967	439431	0.56	3	HET	1	1
DG1136a	12	38580650	38593175	12526	0.75	2	NLOH	0	2
DG1136a	12	38594374	40105299	1510926	0.5556	3	HET	1	1
DG1136a	12	40105549	40107204	1656	0.7101	2	NLOH	0	2
DG1136a	12	40107597	53539832	13432236	0.5625	3	HET	1	1
DG1136a	12	53540597	53542099	1503	0.7248	2	NLOH	0	2
DG1136a	12	53544271	54490938	946668	0.5714	3	HET	1	1
DG1136a	12	54491224	54516279	25056	0.7459	4	NLOH	0	2
DG1136a	12	54516495	78492371	23975877	0.5625	3	HET	1	1
DG1136a	12	78497058	78497284	227	0.9546	2	NLOH	0	2
DG1136a	12	78501437	79197324	695888	0.56	3	HET	1	1
DG1136a	12	79197623	79197962	340	0.8723	2	NLOH	0	2
DG1136a	12	79198015	87823622	8625608	0.5625	3	HET	1	1
DG1136a	12	87864793	87882892	18100	0.7247	4	NLOH	0	2
DG1136a	12	87887139	110099413	22212275	0.5625	3	HET	1	1
DG1136a	12	110099443	110099887	445	0.75	2	NLOH	0	2
DG1136a	12	110101630	115977658	5876029	0.5745	3	HET	1	1
DG1136a	12	115992134	116067330	75197	0.6837	4	NLOH	0	2
DG1136a	12	116067844	116152618	84775	0.6145	3	HET	1	1
DG1136a	12	116156297	116167580	11284	0.6731	4	NLOH	0	2
DG1136a	12	116168751	116260563	91813	0.625	3	HET	1	1
DG1136a	12	116260661	116274777	14117	0.6927	4	NLOH	0	2
DG1136a	12	116275949	117381861	1105913	0.6222	3	HET	1	1
DG1136a	12	117384162	117425256	41095	0.6719	4	NLOH	0	2
DG1136a	12	117434145	118081942	647798	0.625	3	HET	1	1
DG1136a	12	118082022	118093132	11111	0.6792	4	NLOH	0	2
DG1136a	12	118093621	119011034	917414	0.6279	3	HET	1	1
DG1136a	12	119011469	119057534	46066	0.674	2	NLOH	0	2
DG1136a	12	119059299	120875456	1816158	0.625	3	HET	1	1
DG1136a	12	120876065	120932576	56512	0.6667	4	NLOH	0	2
DG1136a	12	120933946	121479655	545710	0.6286	3	HET	1	1
DG1136a	12	121481051	121495608	14558	0.7368	4	NLOH	0	2
DG1136a	12	121499362	122380838	881477	0.6333	3	HET	1	1
DG1136a	12	122382861	122389248	6388	0.7179	2	NLOH	0	2
DG1136a	12	122389647	122675576	285930	0.6278	3	HET	1	1
DG1136a	12	122712981	122874961	161981	0.6804	4	NLOH	0	2
DG1136a	12	122875046	123694724	819679	0.6364	3	HET	1	1
DG1136a	12	123695918	123729621	33704	0.6562	2	NLOH	0	2
DG1136a	12	123730830	124580232	849403	0.625	3	HET	1	1
DG1136a	12	124580353	124630796	50444	0.6946	4	NLOH	0	2
DG1136a	12	124633421	124719549	86129	0.6091	3	HET	1	1
DG1136a	12	124719559	124751753	32195	0.6552	2	NLOH	0	2
DG1136a	12	124752405	124894184	141780	0.6233	3	HET	1	1
DG1136a	12	124901605	124923738	22134	0.8182	2	NLOH	0	2
DG1136a	12	124923742	125568988	645247	0.6216	3	HET	1	1
DG1136a	12	125569713	125629103	59391	0.6714	2	NLOH	0	2
DG1136a	12	125632116	126707012	1074897	0.625	3	HET	1	1
DG1136a	12	126707932	126808311	100380	0.6612	2	NLOH	0	2
DG1136a	12	126827215	126903026	75812	0.625	3	HET	1	1
DG1136a	12	126904299	126908617	4319	0.7	4	NLOH	0	2
DG1136a	12	126908667	127201125	292459	0.625	3	HET	1	1
DG1136a	12	127201771	127495362	293592	0.6591	2	NLOH	0	2
DG1136a	12	127496111	127830359	334249	0.6327	3	HET	1	1
DG1136a	12	127830896	127836315	5420	0.6962	4	NLOH	0	2
DG1136a	12	127836487	128029218	192732	0.6129	3	HET	1	1
DG1136a	12	128029715	128030524	810	0.9058	2	NLOH	0	2
DG1136a	12	128031760	128168306	136547	0.6216	3	HET	1	1
DG1136a	12	128181608	128255202	73595	0.6651	2	NLOH	0	2
DG1136a	12	128259094	128956142	697049	0.6207	3	HET	1	1
DG1136a	12	128956709	128980935	24227	0.675	2	NLOH	0	2
DG1136a	12	128983127	129476079	492953	0.625	3	HET	1	1
DG1136a	12	129479102	129541298	62197	0.6522	2	NLOH	0	2
DG1136a	12	129543664	129563698	20035	0.5909	3	HET	1	1
DG1136a	12	129570140	129591258	21119	0.66	2	NLOH	0	2
DG1136a	12	129592546	129666437	73892	0.625	3	HET	1	1
DG1136a	12	129666632	129687420	20789	0.6667	4	NLOH	0	2
DG1136a	12	129688224	130457809	769586	0.6296	3	HET	1	1
DG1136a	12	130458465	130460321	1857	0.6835	4	NLOH	0	2
DG1136a	12	130460591	130866867	406277	0.6333	3	HET	1	1
DG1136a	12	130870445	130894809	24365	0.6818	2	NLOH	0	2
DG1136a	12	130895518	131127159	231642	0.623	3	HET	1	1
DG1136a	12	131127447	131132579	5133	0.7018	4	NLOH	0	2
DG1136a	12	131141905	131495766	353862	0.6176	3	HET	1	1
DG1136a	12	131496499	131514426	17928	0.7143	4	NLOH	0	2
DG1136a	12	131516196	131689138	172943	0.625	3	HET	1	1
DG1136a	12	131689313	131692280	2968	0.7936	2	NLOH	0	2
DG1136a	12	131693317	131776846	83530	0.6179	3	HET	1	1
DG1136a	12	131777146	131797413	20268	0.7031	2	NLOH	0	2
DG1136a	12	131797470	131813804	16335	0.6111	3	HET	1	1
DG1136a	12	131814248	131895850	81603	0.6774	2	NLOH	0	2
DG1136a	12	131910277	131936164	25888	0.6061	3	HET	1	1
DG1136a	12	131936328	131941550	5223	0.7073	4	NLOH	0	2
DG1136a	12	131943212	131960976	17765	0.6199	3	HET	1	1
DG1136a	12	131962096	131995797	33702	0.641	2	NLOH	0	2
DG1136a	12	131999898	132055701	55804	0.6053	3	HET	1	1
DG1136a	12	132057035	132069387	12353	0.7977	2	NLOH	0	2
DG1136a	12	132069614	132107849	38236	0.6333	3	HET	1	1
DG1136a	12	132108149	132174651	66503	0.6923	4	NLOH	0	2
DG1136a	12	132175106	133037629	862524	0.6279	3	HET	1	1
DG1136a	12	133038082	133050852	12771	0.6779	2	NLOH	0	2
DG1136a	12	133052449	133130487	78039	0.6479	3	HET	1	1
DG1136a	12	133131950	133335784	203835	0.6667	2	NLOH	0	2
DG1136a	12	133336234	133415121	78888	0.6225	3	HET	1	1
DG1136a	12	133416125	133422994	6870	0.6964	4	NLOH	0	2
DG1136a	12	133423662	133812039	388378	0.6271	3	HET	1	1
DG1136a	12	133814105	133836854	22750	0.6863	2	NLOH	0	2
DG1136a	13	19020970	19642434	621465	0.75	1	DLOH	0	1
DG1136a	13	19642441	19644689	2249	0.6082	3	HET	1	1
DG1136a	13	19644768	19646686	1919	0.7387	1	DLOH	0	1
DG1136a	13	19646864	19651685	4822	0.6	3	HET	1	1
DG1136a	13	19669186	21804021	2134836	0.75	1	DLOH	0	1
DG1136a	13	21816816	21864346	47531	0.5903	3	HET	1	1
DG1136a	13	21873114	42003081	20129968	0.7556	1	DLOH	0	1
DG1136a	13	42008313	42027389	19077	0.7727	2	NLOH	0	2
DG1136a	13	42032572	63602904	21570333	0.7568	1	DLOH	0	1
DG1136a	13	63602985	63606189	3205	0.597	3	HET	1	1
DG1136a	13	63606343	63609961	3619	0.7273	1	DLOH	0	1
DG1136a	13	63609985	63621142	11158	0.6034	3	HET	1	1
DG1136a	13	63621153	63625370	4218	0.7222	1	DLOH	0	1
DG1136a	13	63625414	63626609	1196	0.6052	3	HET	1	1
DG1136a	13	63626621	63631385	4765	0.6919	1	DLOH	0	1
DG1136a	13	63631416	63632569	1154	0.5887	3	HET	1	1
DG1136a	13	63632578	63634709	2132	0.6849	1	DLOH	0	1
DG1136a	13	63634768	63634846	79	0.5263	3	HET	1	1
DG1136a	13	63634859	63636503	1645	0.6517	1	DLOH	0	1
DG1136a	13	63636523	63644091	7569	0.5818	3	HET	1	1
DG1136a	13	63644124	112913639	49269516	0.8077	1	DLOH	0	1
DG1136a	13	112932215	112965059	32845	0.8	2	NLOH	0	2
DG1136a	13	112978871	115109637	2130767	0.8333	1	DLOH	0	1
DG1136a	14	19000232	19001446	1215	0.6768	4	NLOH	0	2
DG1136a	14	19001743	19009753	8011	0.6145	3	HET	1	1
DG1136a	14	19009827	19010334	508	0.6972	2	NLOH	0	2
DG1136a	14	19010369	19010811	443	0.5947	3	HET	1	1
DG1136a	14	19010845	19035166	24322	0.6875	2	NLOH	0	2
DG1136a	14	19035202	19036254	1053	0.5714	3	HET	1	1
DG1136a	14	19036292	19036372	81	0.8385	2	NLOH	0	2
DG1136a	14	19036445	19037318	874	0.6305	3	HET	1	1
DG1136a	14	19037602	19040353	2752	0.6842	2	NLOH	0	2
DG1136a	14	19040361	19040837	477	0.5702	3	HET	1	1
DG1136a	14	19040856	19048747	7892	0.6892	2	NLOH	0	2
DG1136a	14	19049544	19085901	36358	0.6792	1	DLOH	0	1
DG1136a	14	19086261	19099317	13057	0.6069	3	HET	1	1
DG1136a	14	19099355	19131452	32098	0.7404	1	DLOH	0	1
DG1136a	14	19134173	19148403	14231	0.5806	3	HET	1	1
DG1136a	14	19161339	19190173	28835	0.5857	3	HET	1	1
DG1136a	14	19190956	20139698	948743	0.7059	2	NLOH	0	2
DG1136a	14	20139783	20142524	2742	0.5655	3	HET	1	1
DG1136a	14	20142717	20424507	281791	0.6667	4	NLOH	0	2
DG1136a	14	20424926	21679351	1254426	0.5625	3	HET	1	1
DG1136a	14	21681419	21791351	109933	0.7727	3	HET	1	1
DG1136a	14	21807536	22831757	1024222	0.5625	3	HET	1	1
DG1136a	14	22864714	22864714	1	0.92	6	HET	1	2
DG1136a	14	22906112	23413333	507222	0.56	3	HET	1	1
DG1136a	14	23414034	23414145	112	0.9474	2	NLOH	0	2
DG1136a	14	23416138	28277295	4861158	0.56	3	HET	1	1
DG1136a	14	28278466	28288920	10455	0.7561	2	NLOH	0	2
DG1136a	14	28288942	28309628	20687	0.5714	3	HET	1	1
DG1136a	14	28309664	28321525	11862	0.7111	2	NLOH	0	2
DG1136a	14	28323191	29482383	1159193	0.56	3	HET	1	1
DG1136a	14	29486934	29487374	441	0.8824	2	NLOH	0	2
DG1136a	14	29487469	32295238	2807770	0.5625	3	HET	1	1
DG1136a	14	32300631	32300674	44	0.8913	2	NLOH	0	2
DG1136a	14	32304277	36417453	4113177	0.5625	3	HET	1	1
DG1136a	14	36417478	36423166	5689	0.7387	2	NLOH	0	2
DG1136a	14	36438046	40038122	3600077	0.5625	3	HET	1	1
DG1136a	14	40055007	40057214	2208	0.75	2	NLOH	0	2
DG1136a	14	40078596	40303496	224901	0.5625	3	HET	1	1
DG1136a	14	40317308	40317326	19	0.8508	2	NLOH	0	2
DG1136a	14	40340612	45385442	5044831	0.561	3	HET	1	1
DG1136a	14	45385588	45386497	910	0.7567	2	NLOH	0	2
DG1136a	14	45386899	56964777	11577879	0.5625	3	HET	1	1
DG1136a	14	56965087	56965087	1	0.5263	3	HET	1	1
DG1136a	14	56965452	73990160	17024709	0.75	1	DLOH	0	1
DG1136a	14	73997258	73997258	1	0.7778	2	NLOH	0	2
DG1136a	14	74025274	99152785	25127512	0.75	1	DLOH	0	1
DG1136a	14	99177385	104744830	5567446	0.5676	3	HET	1	1
DG1136a	14	104749212	104755949	6738	0.7222	2	NLOH	0	2
DG1136a	14	104759877	105907856	1147980	0.5714	3	HET	1	1
DG1136a	14	105909062	106155632	246571	0.6579	2	NLOH	0	2
DG1136a	14	106155833	106175857	20025	0.5946	3	HET	1	1
DG1136a	14	106178322	106197989	19668	0.7045	2	NLOH	0	2
DG1136a	14	106198080	106803256	605177	0.5862	3	HET	1	1
DG1136a	14	106810388	106822575	12188	0.75	2	NLOH	0	2
DG1136a	14	106830059	107086524	256466	0.5631	3	HET	1	1
DG1136a	14	107086805	107087392	588	0.8125	4	NLOH	0	2
DG1136a	14	107087573	107284190	196618	0.5789	3	HET	1	1
DG1136a	15	20000003	20000157	155	0.7961	1	DLOH	0	1
DG1136a	15	20000167	20001079	913	0.57	3	HET	1	1
DG1136a	15	20001087	20005898	4812	0.6964	1	DLOH	0	1
DG1136a	15	20005999	20012629	6631	0.5926	3	HET	1	1
DG1136a	15	20012809	20025828	13020	0.6842	1	DLOH	0	1
DG1136a	15	20025919	20027469	1551	0.6	3	HET	1	1
DG1136a	15	20027509	20064025	36517	0.729	1	DLOH	0	1
DG1136a	15	20064063	20065322	1260	0.5882	3	HET	1	1
DG1136a	15	20065501	20439145	373645	0.75	1	DLOH	0	1
DG1136a	15	20439184	20442993	3810	0.5895	3	HET	1	1
DG1136a	15	20443114	20501339	58226	0.7059	1	DLOH	0	1
DG1136a	15	20501573	20505278	3706	0.5444	3	HET	1	1
DG1136a	15	20505847	20582262	76416	0.7	1	DLOH	0	1
DG1136a	15	20582890	20590903	8014	0.5882	3	HET	1	1
DG1136a	15	20591896	22060090	1468195	0.7209	1	DLOH	0	1
DG1136a	15	22060749	22123238	62490	0.6	3	HET	1	1
DG1136a	15	22126413	22394348	267936	0.7143	1	DLOH	0	1
DG1136a	15	22394441	22410284	15844	0.61	3	HET	1	1
DG1136a	15	22410314	22414190	3877	0.6923	1	DLOH	0	1
DG1136a	15	22414262	22418634	4373	0.5871	3	HET	1	1
DG1136a	15	22419603	22513430	93828	0.6754	1	DLOH	0	1
DG1136a	15	22513906	22526511	12606	0.634	3	HET	1	1
DG1136a	15	22526843	28664617	6137775	0.75	1	DLOH	0	1
DG1136a	15	28698466	28707486	9021	0.5833	3	HET	1	1
DG1136a	15	28707793	34638917	5931125	0.75	1	DLOH	0	1
DG1136a	15	34668312	34860345	192034	0.5714	3	HET	1	1
DG1136a	15	34861427	66176761	31315335	0.7576	1	DLOH	0	1
DG1136a	15	66180939	66349495	168557	0.7584	4	NLOH	0	2
DG1136a	15	66353928	67180856	826929	0.75	1	DLOH	0	1
DG1136a	15	67187842	67264026	76185	0.75	2	NLOH	0	2
DG1136a	15	67266003	70463019	3197017	0.75	1	DLOH	0	1
DG1136a	15	70480929	70533432	52504	0.6909	2	NLOH	0	2
DG1136a	15	70534440	72895917	2361478	0.75	1	DLOH	0	1
DG1136a	15	72898430	72953313	54884	0.7692	2	NLOH	0	2
DG1136a	15	72955979	73624849	668871	0.7647	1	DLOH	0	1
DG1136a	15	73627034	73704897	77864	0.7703	2	NLOH	0	2
DG1136a	15	73709674	74024972	315299	0.7419	1	DLOH	0	1
DG1136a	15	74025728	74113107	87380	0.7906	2	NLOH	0	2
DG1136a	15	74114769	74873679	758911	0.75	1	DLOH	0	1
DG1136a	15	74876353	74929242	52890	0.7778	4	NLOH	0	2
DG1136a	15	74940991	75870715	929725	0.75	1	DLOH	0	1
DG1136a	15	75873072	75903248	30177	0.7543	4	NLOH	0	2
DG1136a	15	75905678	76877702	972025	0.75	1	DLOH	0	1
DG1136a	15	76880939	76902506	21568	0.7778	4	NLOH	0	2
DG1136a	15	76904069	78189653	1285585	0.7647	1	DLOH	0	1
DG1136a	15	78190364	78328060	137697	0.7647	4	NLOH	0	2
DG1136a	15	78332518	78983559	651042	0.75	1	DLOH	0	1
DG1136a	15	78984214	79078554	94341	0.7596	2	NLOH	0	2
DG1136a	15	79083280	79897591	814312	0.75	1	DLOH	0	1
DG1136a	15	79918556	79971035	52480	0.65	2	NLOH	0	2
DG1136a	15	79988804	80729687	740884	0.75	1	DLOH	0	1
DG1136a	15	80730092	80789152	59061	0.75	2	NLOH	0	2
DG1136a	15	80795490	81148967	353478	0.7667	1	DLOH	0	1
DG1136a	15	81150217	81240817	90601	0.7692	4	NLOH	0	2
DG1136a	15	81270141	81550694	280554	0.75	1	DLOH	0	1
DG1136a	15	81551114	81621971	70858	0.7399	4	NLOH	0	2
DG1136a	15	81623151	82561989	938839	0.75	1	DLOH	0	1
DG1136a	15	82571780	82582234	10455	0.7407	4	NLOH	0	2
DG1136a	15	82779635	84760593	1980959	0.7619	1	DLOH	0	1
DG1136a	15	84761452	84884179	122728	0.7728	2	NLOH	0	2
DG1136a	15	84897901	85324467	426567	0.7657	1	DLOH	0	1
DG1136a	15	85328352	85383640	55289	0.76	2	NLOH	0	2
DG1136a	15	85389631	87392236	2002606	0.7619	1	DLOH	0	1
DG1136a	15	87393351	87442842	49492	0.7647	4	NLOH	0	2
DG1136a	15	87446664	88359578	912915	0.76	1	DLOH	0	1
DG1136a	15	88361399	88387568	26170	0.7273	4	NLOH	0	2
DG1136a	15	88388567	88533057	144491	0.7511	1	DLOH	0	1
DG1136a	15	88549775	88734620	184846	0.8	2	NLOH	0	2
DG1136a	15	88744409	89355378	610970	0.7619	1	DLOH	0	1
DG1136a	15	89356832	89615787	258956	0.76	4	NLOH	0	2
DG1136a	15	89616269	89982536	366268	0.7534	1	DLOH	0	1
DG1136a	15	89994838	90084591	89754	0.75	2	NLOH	0	2
DG1136a	15	90099505	91488676	1389172	0.75	1	DLOH	0	1
DG1136a	15	91489222	91663784	174563	0.7593	4	NLOH	0	2
DG1136a	15	91664178	92131467	467290	0.75	1	DLOH	0	1
DG1136a	15	92135348	92454328	318981	0.7647	2	NLOH	0	2
DG1136a	15	92468055	92615561	147507	0.75	1	DLOH	0	1
DG1136a	15	92644737	92751836	107100	0.7692	2	NLOH	0	2
DG1136a	15	92752093	92967170	215078	0.75	1	DLOH	0	1
DG1136a	15	92975005	93247638	272634	0.768	2	NLOH	0	2
DG1136a	15	93249987	93553945	303959	0.75	1	DLOH	0	1
DG1136a	15	93555250	93689193	133944	0.7778	2	NLOH	0	2
DG1136a	15	93694294	94194564	500271	0.75	1	DLOH	0	1
DG1136a	15	94195697	94259983	64287	0.7692	4	NLOH	0	2
DG1136a	15	94288972	98485626	4196655	0.76	1	DLOH	0	1
DG1136a	15	98486502	98560885	74384	0.75	4	NLOH	0	2
DG1136a	15	98561371	99411600	850230	0.7667	1	DLOH	0	1
DG1136a	15	99414423	99451406	36984	0.7267	2	NLOH	0	2
DG1136a	15	99456253	100370878	914626	0.75	1	DLOH	0	1
DG1136a	15	100371272	100415741	44470	0.7534	2	NLOH	0	2
DG1136a	15	100424548	100479011	54464	0.7667	1	DLOH	0	1
DG1136a	15	100489789	100708857	219069	0.75	2	NLOH	0	2
DG1136a	15	100719960	101555714	835755	0.7576	1	DLOH	0	1
DG1136a	15	101557791	101642062	84272	0.75	4	NLOH	0	2
DG1136a	15	101670733	101758881	88149	0.761	1	DLOH	0	1
DG1136a	15	101760081	101802565	42485	0.75	2	NLOH	0	2
DG1136a	15	101807915	102003442	195528	0.7647	1	DLOH	0	1
DG1136a	15	102014095	102079827	65733	0.7692	2	NLOH	0	2
DG1136a	15	102080355	102142930	62576	0.7333	1	DLOH	0	1
DG1136a	15	102144955	102167573	22619	0.8182	2	NLOH	0	2
DG1136a	15	102171885	102287560	115676	0.764	1	DLOH	0	1
DG1136a	15	102290088	102368454	78367	0.7958	4	NLOH	0	2
DG1136a	15	102376749	102445690	68942	0.75	1	DLOH	0	1
DG1136a	15	102455134	102520957	65824	0.6962	2	NLOH	0	2
DG1136a	16	60087	15022065	14961979	0.8378	2	NLOH	0	2
DG1136a	16	15048149	15048845	697	0.8654	8	ALOH	0	3
DG1136a	16	15051084	15124242	73159	0.5806	6	HET	1	2
DG1136a	16	15143548	16366616	1223069	0.8333	2	NLOH	0	2
DG1136a	16	16480584	16480584	1	0.6	5	ALOH	0	3
DG1136a	16	16529145	16724264	195120	0.7576	4	NLOH	0	2
DG1136a	16	16724697	16738140	13444	0.6056	3	HET	1	1
DG1136a	16	16738461	19764105	3025645	0.84	4	NLOH	0	2
DG1136a	16	19785619	19894563	108945	0.6667	1	DLOH	0	1
DG1136a	16	19917332	21578289	1660958	0.8286	2	NLOH	0	2
DG1136a	16	21578530	21583579	5050	0.5641	3	HET	1	1
DG1136a	16	21585041	22566219	981179	0.8378	2	NLOH	0	2
DG1136a	16	22581939	22709763	127825	0.5745	3	HET	1	1
DG1136a	16	22760836	23236879	476044	0.8356	4	NLOH	0	2
DG1136a	16	23257383	23307915	50533	0.5634	11	BCNA	2	2
DG1136a	16	23308564	25832600	2524037	0.6333	6	HET	1	2
DG1136a	16	25843599	28613326	2769728	0.5625	3	HET	1	1
DG1136a	16	28615708	28764852	149145	0.7073	2	NLOH	0	2
DG1136a	16	28833528	29199944	366417	0.5806	3	HET	1	1
DG1136a	16	29200581	29204502	3922	0.7692	2	NLOH	0	2
DG1136a	16	29204636	31966202	2761567	0.5758	3	HET	1	1
DG1136a	16	31970934	32277179	306246	0.6818	2	NLOH	0	2
DG1136a	16	32277514	32297765	20252	0.5437	3	HET	1	1
DG1136a	16	32298037	32383998	85962	0.6867	2	NLOH	0	2
DG1136a	16	32384609	32394016	9408	0.5555	3	HET	1	1
DG1136a	16	32394149	32394477	329	0.816	2	NLOH	0	2
DG1136a	16	32394945	32396533	1589	0.5333	3	HET	1	1
DG1136a	16	32396647	32400613	3967	0.697	2	NLOH	0	2
DG1136a	16	32401150	32401619	470	0.5457	3	HET	1	1
DG1136a	16	32402515	32405310	2796	0.6923	2	NLOH	0	2
DG1136a	16	32405490	32406464	975	0.5595	3	HET	1	1
DG1136a	16	32406592	32418941	12350	0.6847	2	NLOH	0	2
DG1136a	16	32419144	32421911	2768	0.5733	3	HET	1	1
DG1136a	16	32422185	32427106	4922	0.7237	2	NLOH	0	2
DG1136a	16	32427207	32429618	2412	0.5541	3	HET	1	1
DG1136a	16	32429959	32439908	9950	0.7119	2	NLOH	0	2
DG1136a	16	32440057	32442462	2406	0.5587	3	HET	1	1
DG1136a	16	32443345	32454363	11019	0.7313	2	NLOH	0	2
DG1136a	16	32454379	32467767	13389	0.6125	3	HET	1	1
DG1136a	16	32467837	32470464	2628	0.7036	2	NLOH	0	2
DG1136a	16	32470495	32473419	2925	0.587	3	HET	1	1
DG1136a	16	32473529	32488647	15119	0.7034	2	NLOH	0	2
DG1136a	16	32489073	32494166	5094	0.5435	3	HET	1	1
DG1136a	16	32494821	32496324	1504	0.7529	2	NLOH	0	2
DG1136a	16	32496961	32498874	1914	0.5833	3	HET	1	1
DG1136a	16	32499192	32502528	3337	0.6875	2	NLOH	0	2
DG1136a	16	32502731	32512943	10213	0.5422	3	HET	1	1
DG1136a	16	32513072	32516031	2960	0.7026	2	NLOH	0	2
DG1136a	16	32516108	32516782	675	0.6025	3	HET	1	1
DG1136a	16	32516858	32520247	3390	0.6522	2	NLOH	0	2
DG1136a	16	32520264	32521621	1358	0.5911	3	HET	1	1
DG1136a	16	32521788	32523175	1388	0.6703	2	NLOH	0	2
DG1136a	16	32523228	32524544	1317	0.6072	3	HET	1	1
DG1136a	16	32524603	32525313	711	0.7468	2	NLOH	0	2
DG1136a	16	32525336	32525929	594	0.5493	3	HET	1	1
DG1136a	16	32526033	32548086	22054	0.6838	2	NLOH	0	2
DG1136a	16	32548196	32550037	1842	0.6087	3	HET	1	1
DG1136a	16	32550046	32562215	12170	0.682	2	NLOH	0	2
DG1136a	16	32562409	32567429	5021	0.5467	3	HET	1	1
DG1136a	16	32567790	32569602	1813	0.8136	2	NLOH	0	2
DG1136a	16	32571556	32818340	246785	0.5517	3	HET	1	1
DG1136a	16	32819070	32828593	9524	0.7021	2	NLOH	0	2
DG1136a	16	32828639	32830324	1686	0.5643	3	HET	1	1
DG1136a	16	32830399	32831659	1261	0.7938	2	NLOH	0	2
DG1136a	16	32831826	32838213	6388	0.5904	3	HET	1	1
DG1136a	16	32838255	32851555	13301	0.7192	2	NLOH	0	2
DG1136a	16	32851605	32884362	32758	0.5758	3	HET	1	1
DG1136a	16	32887251	33417350	530100	0.6957	4	NLOH	0	2
DG1136a	16	33417374	33427270	9897	0.6087	3	HET	1	1
DG1136a	16	33427371	33430769	3399	0.6923	2	NLOH	0	2
DG1136a	16	33430914	33443845	12932	0.5789	3	HET	1	1
DG1136a	16	33444413	33444766	354	0.7826	2	NLOH	0	2
DG1136a	16	33444846	33505113	60268	0.5882	3	HET	1	1
DG1136a	16	33505256	33506496	1241	0.7027	2	NLOH	0	2
DG1136a	16	33506574	33510415	3842	0.6231	3	HET	1	1
DG1136a	16	33510459	33517290	6832	0.6897	2	NLOH	0	2
DG1136a	16	33517319	33518126	808	0.5824	3	HET	1	1
DG1136a	16	33518356	33521030	2675	0.6489	2	NLOH	0	2
DG1136a	16	33521142	33529533	8392	0.5616	3	HET	1	1
DG1136a	16	33529589	33532140	2552	0.6542	2	NLOH	0	2
DG1136a	16	33532243	33533928	1686	0.5714	3	HET	1	1
DG1136a	16	33534006	33535615	1610	0.6554	2	NLOH	0	2
DG1136a	16	33535651	33535912	262	0.5547	3	HET	1	1
DG1136a	16	33535916	33536011	96	0.8151	2	NLOH	0	2
DG1136a	16	33536122	33536827	706	0.5743	3	HET	1	1
DG1136a	16	33536853	33537125	273	0.6947	2	NLOH	0	2
DG1136a	16	33537180	33537303	124	0.5316	3	HET	1	1
DG1136a	16	33537331	33537454	124	0.7141	4	NLOH	0	2
DG1136a	16	33537558	33539648	2091	0.5986	3	HET	1	1
DG1136a	16	33539699	33547517	7819	0.6864	2	NLOH	0	2
DG1136a	16	33547546	33548025	480	0.5621	3	HET	1	1
DG1136a	16	33548046	33550527	2482	0.7054	2	NLOH	0	2
DG1136a	16	33550779	33552077	1299	0.5613	3	HET	1	1
DG1136a	16	33552087	33552211	125	1	2	NLOH	0	2
[truncated: 9,734 more rows]

## Sheet: c) APOLLOH_HMMcopy_positions
Sample	Total Number of SNP loci	Number of SNPs with CNA/LOH status	Proportion of SNPs with CNA/LOH status	Number of SNPs with Deletion (<2 copies) status	Proportion of SNPs with Deletion (<2 copies) status	Number of SNPs with Amplification (>2 copies) status	Proportion of SNPs with Amplification (>2 copies) status	Number of SNPs with LOH status	Proportion of SNPs with LOH status
DG1136a	2294484	1587039	0.691676	495394	0.215906	205272	0.0894633	691073	0.301189
DG1136c	2279929	1508405	0.661602	488497	0.21426	290013	0.127203	711706	0.312161
DG1136e	2265963	1541573	0.680317	469352	0.207131	231471	0.102151	655100	0.289104
DG1136g	2265051	1470070	0.649023	501144	0.221251	223735	0.098777	721051	0.318338
DG1136i	2302060	1534654	0.666644	550574	0.239166	204745	0.0889399	751350	0.326382
