# Supplementary material for: TITAN: inference of copy number architectures in clonal cell populations from tumor whole-genome sequence data
Source: HighWire-hosted journal article supplement (doi:10.1101/gr.180281.114), 2014-07-24
Supplement: TITAN_Supp_Tables.zip [file table_S2.xlsx]

## Sheet: a) Spike-in truth segments
Event ID	Chr	Start	End	Length	Number of SNPs	AllelicRatio	LogR	Type
DG1136a_tum100	2	228309211	228320019	10809	10	0.700893	0.7756	AMP
DG1136a_tum100	18	76062577	76069480	6904	10	0.71364	0.85405	AMP
DG1136a_tum100	1	21551341	21574838	23498	10	0.688889	0.72375	AMP
DG1136a_tum100	2	170169436	170173164	3729	10	0.688587	0.81985	AMP
DG1136a_tum100	2	171424123	171530478	106356	100	0.704416	0.78885	AMP
DG1136a_tum100	1	225636789	225743300	106512	100	0.707615	0.81395	AMP
DG1136a_tum100	1	59772268	59849153	76886	100	0.715251	0.7682	AMP
DG1136a_tum100	18	9171177	9395621	224445	100	0.714286	0.7845	AMP
DG1136a_tum100	9	26376870	27417407	1040538	1000	0.704385	0.7923	AMP
DG1136a_tum100	18	11825395	12955120	1129726	1000	0.705882	0.7861	AMP
DG1136a_tum100	1	192738094	194385340	1647247	1000	0.704732	0.78795	AMP
DG1136a_tum100	2	202842117	205200643	2358527	1000	0.706897	0.7925	AMP
DG1136a_tum100	2	144547402	160516534	15969133	10000	0.704385	0.7901	AMP
DG1136a_tum100	9	110421778	110422922	1145	10	0.75	-0.50775	DEL
DG1136a_tum100	9	132551331	132552994	1664	10	0.73592	-0.46275	DEL
DG1136a_tum100	18	61571199	61577041	5843	10	0.682105	-0.42115	DEL
DG1136a_tum100	1	177836854	177841976	5123	10	0.792385	-0.52	DEL
DG1136a_tum100	1	7661765	7736097	74333	100	0.762531	-0.5055	DEL
DG1136a_tum100	2	23630297	23689945	59649	100	0.764706	-0.507	DEL
DG1136a_tum100	1	210038318	210354131	315814	100	0.75	-0.5331	DEL
DG1136a_tum100	2	228809625	228908051	98427	100	0.760952	-0.51385	DEL
DG1136a_tum100	2	164851354	166979889	2128536	1000	0.75	-0.5167	DEL
DG1136a_tum100	9	74927609	76427979	1500371	1000	0.758098	-0.5096	DEL
DG1136a_tum100	2	60491758	61872624	1380867	1000	0.75	-0.51595	DEL
DG1136a_tum100	9	72639118	73577447	938330	1000	0.757576	-0.5021	DEL
DG1136a_tum100	9	15018976	25043605	10024630	10000	0.75	-0.50765	DEL
DG1136a_tum80-norm20	9	31488462	31489598	1137	10	0.600132	0.4768	AMP
DG1136a_tum80-norm20	18	32460023	32611888	151866	10	0.6	0.47865	AMP
DG1136a_tum80-norm20	9	70162694	70173990	11297	10	0.583931	0.47745	AMP
DG1136a_tum80-norm20	18	59450622	59459110	8489	10	0.623821	0.509	AMP
DG1136a_tum80-norm20	1	26449595	26528761	79167	100	0.604219	0.4865	AMP
DG1136a_tum80-norm20	2	141363453	141422030	58578	100	0.593907	0.47045	AMP
DG1136a_tum80-norm20	18	65367112	65428015	60904	100	0.606309	0.46505	AMP
DG1136a_tum80-norm20	2	181675610	181764318	88709	100	0.611111	0.47005	AMP
DG1136a_tum80-norm20	2	27013263	28718249	1704987	1000	0.60397	0.46985	AMP
DG1136a_tum80-norm20	18	67227276	68611117	1383842	1000	0.60685	0.46395	AMP
DG1136a_tum80-norm20	2	172543651	173498025	954375	1000	0.604651	0.4726	AMP
DG1136a_tum80-norm20	18	65537101	66580694	1043594	1000	0.607143	0.4715	AMP
DG1136a_tum80-norm20	2	211854174	224694654	12840481	10000	0.605263	0.47065	AMP
DG1136a_tum80-norm20	9	1594081	1596072	1992	10	0.574275	-0.3873	DEL
DG1136a_tum80-norm20	2	210633725	210642473	8749	10	0.603571	-0.3544	DEL
DG1136a_tum80-norm20	2	133097321	133098040	720	10	0.666667	-0.38785	DEL
DG1136a_tum80-norm20	1	79988932	79999331	10400	10	0.651087	-0.3924	DEL
DG1136a_tum80-norm20	18	39193771	39316813	123043	100	0.6	-0.34805	DEL
DG1136a_tum80-norm20	9	98990674	99073357	82684	100	0.617216	-0.3339	DEL
DG1136a_tum80-norm20	9	44872439	44993571	121133	100	0.618037	-0.32775	DEL
DG1136a_tum80-norm20	18	71571911	71653657	81747	100	0.609903	-0.33375	DEL
DG1136a_tum80-norm20	18	57890756	59319282	1428527	1000	0.6	-0.35255	DEL
DG1136a_tum80-norm20	1	73226328	73912799	686472	1000	0.6	-0.3488	DEL
DG1136a_tum80-norm20	18	34879309	36037470	1158162	1000	0.607143	-0.34825	DEL
DG1136a_tum80-norm20	18	24656519	27006298	2349780	1000	0.605662	-0.3472	DEL
DG1136a_tum80-norm20	9	83489396	95699605	12210210	10000	0.606061	-0.3476	DEL
DG1136a_tum60-norm40	1	235462744	235467933	5190	10	0.605978	0.36475	AMP
DG1136a_tum60-norm40	2	84542478	84548690	6213	10	0.639423	0.3804	AMP
DG1136a_tum60-norm40	9	115400528	115483680	83153	10	0.534856	0.32835	AMP
DG1136a_tum60-norm40	9	14454393	14458887	4495	10	0.577208	0.3442	AMP
DG1136a_tum60-norm40	9	14582043	14664357	82315	100	0.571429	0.35445	AMP
DG1136a_tum60-norm40	1	53010798	53103781	92984	100	0.571429	0.35805	AMP
DG1136a_tum60-norm40	1	246301867	246438778	136912	100	0.56	0.34145	AMP
DG1136a_tum60-norm40	2	64292301	64360433	68133	100	0.567875	0.3505	AMP
DG1136a_tum60-norm40	18	14559167	15390699	831533	1000	0.571429	0.3487	AMP
DG1136a_tum60-norm40	2	4121289	5008127	886839	1000	0.571429	0.3479	AMP
DG1136a_tum60-norm40	2	16951286	18038730	1087445	1000	0.571429	0.34665	AMP
DG1136a_tum60-norm40	18	6578141	7508561	930421	1000	0.571429	0.352	AMP
DG1136a_tum60-norm40	2	71297982	82998737	11700756	10000	0.571429	0.3493	AMP
DG1136a_tum60-norm40	18	72226504	72233320	6817	10	0.622024	-0.32645	DEL
DG1136a_tum60-norm40	18	22740958	22777081	36124	10	0.563492	-0.2926	DEL
DG1136a_tum60-norm40	18	66834481	66853925	19445	10	0.579796	-0.293	DEL
DG1136a_tum60-norm40	1	192205562	192213236	7675	10	0.551587	-0.302	DEL
DG1136a_tum60-norm40	2	143377394	143420708	43315	100	0.571429	-0.29815	DEL
DG1136a_tum60-norm40	1	85938561	85991140	52580	100	0.579796	-0.29885	DEL
DG1136a_tum60-norm40	9	6927093	6941889	14797	100	0.566667	-0.30655	DEL
DG1136a_tum60-norm40	2	242125784	242221219	95436	100	0.591751	-0.2982	DEL
DG1136a_tum60-norm40	2	104816213	106152788	1336576	1000	0.583333	-0.2908	DEL
DG1136a_tum60-norm40	2	123606159	124915643	1309485	1000	0.583333	-0.295	DEL
DG1136a_tum60-norm40	18	2776307	3675604	899298	1000	0.582364	-0.2956	DEL
DG1136a_tum60-norm40	1	44565239	47000996	2435758	1000	0.580645	-0.2969	DEL
DG1136a_tum60-norm40	1	28247278	43014649	14767372	10000	0.580645	-0.2968	DEL

## Sheet: b) Segment_performance
chr	start	end	width	numPosns	id	eventType	numPosnUsed	eventTP	cpTP	eventTPR	cpTPR
1	21551341	21574838	23498	10	DG1136a_tum100	AMP	10	10	0	1	0
1	79988932	79999331	10400	10	DG1136a_tum80-norm20	DEL	9	0	0	0	0
1	177836854	177841976	5123	10	DG1136a_tum100	DEL	8	8	8	1	1
1	192205562	192213236	7675	10	DG1136a_tum60-norm40	DEL	10	0	0	0	0
1	235462744	235467933	5190	10	DG1136a_tum60-norm40	AMP	10	0	0	0	0
2	84542478	84548690	6213	10	DG1136a_tum60-norm40	AMP	10	0	0	0	0
2	133097321	133098040	720	10	DG1136a_tum80-norm20	DEL	10	0	0	0	0
2	170169436	170173164	3729	10	DG1136a_tum100	AMP	10	10	10	1	1
2	210633725	210642473	8749	10	DG1136a_tum80-norm20	DEL	9	0	0	0	0
2	228309211	228320019	10809	10	DG1136a_tum100	AMP	10	10	10	1	1
9	1594081	1596072	1992	10	DG1136a_tum80-norm20	DEL	9	0	0	0	0
9	14454393	14458887	4495	10	DG1136a_tum60-norm40	AMP	10	0	0	0	0
9	31488462	31489598	1137	10	DG1136a_tum80-norm20	AMP	10	10	0	1	0
9	70162694	70173990	11297	10	DG1136a_tum80-norm20	AMP	10	10	0	1	0
9	110421778	110422922	1145	10	DG1136a_tum100	DEL	10	10	0	1	0
9	115400528	115483680	83153	10	DG1136a_tum60-norm40	AMP	10	0	0	0	0
9	132551331	132552994	1664	10	DG1136a_tum100	DEL	9	9	9	1	1
18	22740958	22777081	36124	10	DG1136a_tum60-norm40	DEL	9	0	0	0	0
18	32460023	32611888	151866	10	DG1136a_tum80-norm20	AMP	10	10	10	1	1
18	59450622	59459110	8489	10	DG1136a_tum80-norm20	AMP	10	9	9	0.9	0.9
18	61571199	61577041	5843	10	DG1136a_tum100	DEL	10	10	0	1	0
18	66834481	66853925	19445	10	DG1136a_tum60-norm40	DEL	9	0	0	0	0
18	72226504	72233320	6817	10	DG1136a_tum60-norm40	DEL	9	0	0	0	0
18	76062577	76069480	6904	10	DG1136a_tum100	AMP	10	10	10	1	1
1	7661765	7736097	74333	100	DG1136a_tum100	DEL	92	92	92	1	1
1	26449595	26528761	79167	100	DG1136a_tum80-norm20	AMP	97	97	0	1	0
1	53010798	53103781	92984	100	DG1136a_tum60-norm40	AMP	100	100	5	1	0.05
1	59772268	59849153	76886	100	DG1136a_tum100	AMP	100	100	100	1	1
1	85938561	85991140	52580	100	DG1136a_tum60-norm40	DEL	98	98	0	1	0
1	210038318	210354131	315814	100	DG1136a_tum100	DEL	95	94	94	0.989474	0.989474
1	225636789	225743300	106512	100	DG1136a_tum100	AMP	99	99	99	1	1
1	246301867	246438778	136912	100	DG1136a_tum60-norm40	AMP	100	100	100	1	1
2	23630297	23689945	59649	100	DG1136a_tum100	DEL	98	98	98	1	1
2	64292301	64360433	68133	100	DG1136a_tum60-norm40	AMP	100	100	0	1	0
2	141363453	141422030	58578	100	DG1136a_tum80-norm20	AMP	100	100	0	1	0
2	143377394	143420708	43315	100	DG1136a_tum60-norm40	DEL	95	95	95	1	1
2	171424123	171530478	106356	100	DG1136a_tum100	AMP	100	100	100	1	1
2	181675610	181764318	88709	100	DG1136a_tum80-norm20	AMP	100	100	0	1	0
2	228809625	228908051	98427	100	DG1136a_tum100	DEL	95	94	94	0.989474	0.989474
2	242125784	242221219	95436	100	DG1136a_tum60-norm40	DEL	95	95	95	1	1
9	6927093	6941889	14797	100	DG1136a_tum60-norm40	DEL	95	95	95	1	1
9	14582043	14664357	82315	100	DG1136a_tum60-norm40	AMP	99	99	0	1	0
9	44872439	44993571	121133	100	DG1136a_tum80-norm20	DEL	98	98	0	1	0
9	98990674	99073357	82684	100	DG1136a_tum80-norm20	DEL	99	99	99	1	1
18	9171177	9395621	224445	100	DG1136a_tum100	AMP	100	100	100	1	1
18	39193771	39316813	123043	100	DG1136a_tum80-norm20	DEL	98	98	98	1	1
18	65367112	65428015	60904	100	DG1136a_tum80-norm20	AMP	100	100	0	1	0
18	71571911	71653657	81747	100	DG1136a_tum80-norm20	DEL	96	96	0	1	0
1	44565239	47000996	2435758	1000	DG1136a_tum60-norm40	DEL	971	971	971	1	1
1	73226328	73912799	686472	1000	DG1136a_tum80-norm20	DEL	956	956	956	1	1
1	192738094	194385340	1647247	1000	DG1136a_tum100	AMP	996	996	996	1	1
2	4121289	5008127	886839	1000	DG1136a_tum60-norm40	AMP	991	990	0	0.998991	0
2	16951286	18038730	1087445	1000	DG1136a_tum60-norm40	AMP	993	993	0	1	0
2	27013263	28718249	1704987	1000	DG1136a_tum80-norm20	AMP	994	994	0	1	0
2	60491758	61872624	1380867	1000	DG1136a_tum100	DEL	943	943	943	1	1
2	104816213	106152788	1336576	1000	DG1136a_tum60-norm40	DEL	956	956	956	1	1
2	123606159	124915643	1309485	1000	DG1136a_tum60-norm40	DEL	966	966	966	1	1
2	164851354	166979889	2128536	1000	DG1136a_tum100	DEL	947	947	947	1	1
2	172543651	173498025	954375	1000	DG1136a_tum80-norm20	AMP	992	992	0	1	0
2	202842117	205200643	2358527	1000	DG1136a_tum100	AMP	993	993	993	1	1
9	26376870	27417407	1040538	1000	DG1136a_tum100	AMP	990	990	990	1	1
9	72639118	73577447	938330	1000	DG1136a_tum100	DEL	939	939	930	1	0.990415
9	74927609	76427979	1500371	1000	DG1136a_tum100	DEL	946	946	946	1	1
18	2776307	3675604	899298	1000	DG1136a_tum60-norm40	DEL	958	957	957	0.998956	0.998956
18	6578141	7508561	930421	1000	DG1136a_tum60-norm40	AMP	992	992	0	1	0
18	11825395	12955120	1129726	1000	DG1136a_tum100	AMP	997	997	997	1	1
18	14559167	15390699	831533	1000	DG1136a_tum60-norm40	AMP	995	995	0	1	0
18	24656519	27006298	2349780	1000	DG1136a_tum80-norm20	DEL	954	953	953	0.998952	0.998952
18	34879309	36037470	1158162	1000	DG1136a_tum80-norm20	DEL	971	971	971	1	1
18	57890756	59319282	1428527	1000	DG1136a_tum80-norm20	DEL	958	958	958	1	1
18	65537101	66580694	1043594	1000	DG1136a_tum80-norm20	AMP	993	993	0	1	0
18	67227276	68611117	1383842	1000	DG1136a_tum80-norm20	AMP	999	999	0	1	0
1	28247278	43014649	14767372	10000	DG1136a_tum60-norm40	DEL	9652	9652	9652	1	1
2	71297982	82998737	11700756	10000	DG1136a_tum60-norm40	AMP	9927	9927	0	1	0
2	144547402	160516534	15969133	10000	DG1136a_tum100	AMP	9956	9956	9956	1	1
2	211854174	224694654	12840481	10000	DG1136a_tum80-norm20	AMP	9945	9945	0	1	0
9	15018976	25043605	10024630	10000	DG1136a_tum100	DEL	9393	9393	9393	1	1
9	83489396	95699605	12210210	10000	DG1136a_tum80-norm20	DEL	9644	9644	9644	1	1

## Sheet: c) Size_performance
DELETIONS AND GAINS
numSNPs	numPosns	medianLength	eventNumPosns	eventTP	eventTPR	numTPevents	cpNumPosns	cpTP	cpTPR	numTPcp	numNegPosns	allFPR
10	240	6860.5	231	116	0.502165	11	231	66	0.285714	6
100	2400	82499.5	2349	2347	0.999149	24	2349	1364	0.580673	14
1000	24000	1.23382e+06	23390	23387	0.999872	24	23390	15430	0.659684	16
10000	60000	1.25253e+07	58517	58517	1	6	58517	38645	0.660406	4
total	86640	NA	84487	84367	0.99858	65	84487	55505	0.656965	40	441599	0.0401699
DELETIONS
DEL.numSNPs	DEL.numPosns	DEL.medianLength	DEL.eventNumPosns	DEL.eventTP	DEL.eventTPR	DEL.numTPevents	DEL.cpNumPosns	DEL.cpTP	DEL.cpTPR	DEL.numTPcp
10	120	6330	111	37	0.333333	4	111	17	0.153153	2
100	1200	82215.5	1154	1152	0.998267	12	1154	860	0.745234	9
1000	12000	1.35872e+06	11465	11463	0.999826	12	11465	11454	0.999041	12
10000	30000	12210210	28689	28689	1	3	28689	28689	1	3
total	43320	NA	41419	41341	0.998117	31	41419	41020	0.990367	26
GAINS
AMP.numSNPs	AMP.numPosns	AMP.medianLength	AMP.eventNumPosns	AMP.eventTP	AMP.eventTPR	AMP.numTPevents	AMP.cpNumPosns	AMP.cpTP	AMP.cpTPR	AMP.numTPcp
10	120	7696.5	120	79	0.658333	7	120	49	0.408333	4
100	1200	85512	1195	1195	1	12	1195	504	0.421757	5
1000	12000	1.06552e+06	11925	11924	0.999916	12	11925	3976	0.333417	4
10000	30000	12840481	29828	29828	1	3	29828	9956	0.33378	1
total	43320	NA	43068	43026	0.999025	34	43068	14485	0.336329	14
