# Supplementary material for: TITAN: inference of copy number architectures in clonal cell populations from tumor whole-genome sequence data
Source: HighWire-hosted journal article supplement (doi:10.1101/gr.180281.114), 2014-07-24
Supplement: TITAN_Supp_Tables.zip [file table_S3.xlsx]

## Sheet: a) DG1136 sample info
Sample	Site	Coverage	Gigabases sequenced	Cellularity (Pathologist)	APOLLOH Tumour Content Estimate	Cellularity (Estimated+Pathologist)	Normal Contamination
DG1136a	Right Ovary Site 1	33.9238	110.925	0.6	0.6702	0.6351	0.3649
DG1136c	Right Ovary Site 2	34.6997	109.132	0.25	0.4441	0.34705	0.65295
DG1136e	Right Ovary Site 3	31.8637	99.5886	0.7	0.6322	0.6661	0.3339
DG1136g	Right Ovary Site 4	29.5289	94.116	0.65	0.4641	0.55705	0.44295
DG1136i	Left Pelvic Sidewall Site 1	35.2803	110.554	0.5	0.4833	0.49165	0.50835

## Sheet: b) Serial Mixture
Individual								Merge
DG1136e	DG1136g	% tumour of e	% tumour of g	% normal of e	% normal of g	Total		% tumour	% normal	Cellular Prevalence of e	Cellular Prevalence of g	Total
0.1	0.9	0.06661	0.501345	0.03339	0.398655	1		0.567955	0.432045	0.11728	0.88272	1
0.2	0.8	0.13322	0.44564	0.06678	0.35436	1		0.57886	0.42114	0.230142	0.769858	1
0.3	0.7	0.19983	0.389935	0.10017	0.310065	1		0.589765	0.410235	0.33883	0.66117	1
0.4	0.6	0.26644	0.33423	0.13356	0.26577	1		0.60067	0.39933	0.443571	0.556429	1
0.5	0.5	0.33305	0.278525	0.16695	0.221475	1		0.611575	0.388425	0.544578	0.455422	1
0.6	0.4	0.39966	0.22282	0.20034	0.17718	1		0.62248	0.37752	0.642045	0.357955	1
0.7	0.3	0.46627	0.167115	0.23373	0.132885	1		0.633385	0.366615	0.736156	0.263844	1
0.8	0.2	0.53288	0.11141	0.26712	0.08859	1		0.64429	0.35571	0.827081	0.172919	1
0.9	0.1	0.59949	0.055705	0.30051	0.044295	1		0.655195	0.344805	0.91498	0.0850205	1
Sample	Site	Coverage	Cellularity (Estimated+Pathologist)	Normal Contamination
DG1136e	Right Ovary Site 3	31.8637	0.6661	0.3339
DG1136g	Right Ovary Site 4	29.5289	0.55705	0.44295
TITAN Results
DG1136e	DG1136g	Number of Clusters	Normal Proportion, n	Average Tumour Ploidy	Cluster 1	Cluster 2	Cluster 3	Cluster 4
0.1	0.9	4	0.4	1.8	0.9539	0.737	0.5159	0.187
0.2	0.8	4	0.38	1.8	0.9506	0.7076	0.5026	0.1806
0.3	0.7	3	0.39	1.81	0.9711	0.57	0.2407
0.4	0.6	3	0.38	1.82	0.9681	0.599	0.2555
0.5	0.5	3	0.38	1.82	0.9861	0.619	0.2577
0.6	0.4	3	0.36	1.82	0.9786	0.6301	0.2464
0.7	0.3	2	0.35	1.83	0.9648	0.3566
0.8	0.2	3	0.34	1.81	0.9787	0.6145	0.2067
0.9	0.1	3	0.32	1.82	0.9707	0.6172	0.198

## Sheet: c) Pairwise Merge
Individual										Merge
Sample1	Sample2	% of 1	% of 2	% tumour of 1	% tumour of 2	% normal of 1	% normal of 2	Total		% tumour	% normal	Cellular Prevalence of 1	Cellular Prevalence of 2	Total	Coverage
a	c	0.494347	0.505653	0.31396	0.175487	0.180387	0.330166	1		0.489447	0.510553	0.494347	0.505653	1	68.6235
a	e	0.515657	0.484343	0.327494	0.322621	0.188163	0.161722	1		0.650115	0.349885	0.515657	0.484343	1	65.7875
a	g	0.534631	0.465369	0.339544	0.259234	0.195087	0.206135	1		0.598778	0.401222	0.534631	0.465369	1	63.4527
a	i	0.490199	0.509801	0.311325	0.250644	0.178874	0.259157	1		0.561969	0.438031	0.490199	0.509801	1	69.2041
c	e	0.521303	0.478697	0.180918	0.31886	0.340385	0.159837	1		0.499778	0.500222	0.521303	0.478697	1	66.5634
c	g	0.540253	0.459747	0.187495	0.256102	0.352758	0.203645	1		0.443597	0.556403	0.540253	0.459747	1	64.2286
c	i	0.495851	0.504149	0.172085	0.247865	0.323766	0.256284	1		0.41995	0.58005	0.495851	0.504149	1	69.98
e	g	0.519015	0.480985	0.345716	0.267933	0.173299	0.213052	1		0.613649	0.386351	0.519015	0.480985	1	61.3926
e	i	0.474557	0.525443	0.316103	0.258334	0.158455	0.267109	1		0.574437	0.425563	0.474557	0.525443	1	67.144
g	i	0.455628	0.544372	0.253808	0.26764	0.201821	0.276731	1		0.521448	0.478552	0.455628	0.544372	1	64.8093
TITAN Results
Sample1	Sample2	Number of Clusters	Normal Proportion, n	Average Tumour Ploidy	Cluster 1	Cluster 2	Cluster 3	Cluster 4
a	c	3	0.44	1.88	0.9665	0.6805	0.4688
a	e	3	0.29	1.88	0.9534	0.634	0.4598
a	g	4	0.37	1.85	0.9771	0.7245	0.4739	0.203
a	i	2	0.47	1.86	0.9655	0.5684
c	e	3	0.43	1.9	0.958	0.6955	0.4313
c	g	2	0.5	1.89	0.9652	0.41
c	i	2	0.59	1.87	0.9656	0.5406
e	g	2	0.36	1.86	0.9771	0.4435
e	i	3	0.45	1.88	0.9621	0.7012	0.4705
g	i	2	0.53	1.83	0.9769	0.4477

## Sheet: d) Triplet Merge
Individual														Merge
Sample1	Sample2	Sample3	% of 1	% of 2	% of 3	% tumour of 1	% tumour of 2	% tumour of 3	% normal of 1	% normal of 2	% normal of 3	Total		% tumour	% normal	Cellular Prevalence of 1	Cellular Prevalence of 2	Cellular Prevalence of 3	Total	Coverage
a	c	e	0.337593	0.345315	0.317092	0.214405	0.119841	0.211215	0.123188	0.225473	0.105877	1		0.545462	0.454538	0.337593	0.345315	0.317092	1	100.487
a	c	g	0.345624	0.353529	0.300848	0.219506	0.122692	0.167587	0.126118	0.230837	0.13326	1		0.509785	0.490215	0.345624	0.353529	0.300848	1	98.1524
a	c	i	0.326492	0.33396	0.339548	0.207355	0.115901	0.166939	0.119137	0.218059	0.172609	1		0.490195	0.509805	0.326492	0.33396	0.339548	1	103.904
a	e	g	0.355907	0.334294	0.309799	0.226037	0.222673	0.172574	0.129871	0.111621	0.137226	1		0.621283	0.378717	0.355907	0.334294	0.309799	1	95.3164
a	e	i	0.335654	0.31527	0.349076	0.213174	0.210002	0.171623	0.12248	0.105269	0.177453	1		0.594798	0.405202	0.335654	0.31527	0.349076	1	101.068
a	g	i	0.343591	0.299078	0.357331	0.218215	0.166602	0.175682	0.125376	0.132477	0.181649	1		0.560498	0.439502	0.343591	0.299078	0.357331	1	98.7331
c	e	g	0.361108	0.331594	0.307298	0.125323	0.220875	0.17118	0.235785	0.110719	0.136117	1		0.517378	0.482622	0.361108	0.331594	0.307298	1	96.0923
c	e	i	0.340715	0.312868	0.346416	0.118245	0.208402	0.170316	0.22247	0.104467	0.176101	1		0.496962	0.503038	0.340715	0.312868	0.346416	1	101.844
c	g	i	0.348709	0.296746	0.354544	0.12102	0.165303	0.174312	0.22769	0.131444	0.180233	1		0.460634	0.539366	0.348709	0.296746	0.354544	1	99.509
e	g	i	0.329603	0.305452	0.364945	0.219548	0.170152	0.179425	0.110054	0.1353	0.18552	1		0.569126	0.430874	0.329603	0.305452	0.364945	1	96.6729
TITAN results
Sample1	Sample2	Sample3	Number of Clusters	Normal Proportion, n	Average Tumour Ploidy	Cluster 1	Cluster 2	Cluster 3	Cluster 4	Cluster 5
a	c	e	3	0.38	1.89	0.9513	0.6612	0.4721
a	c	g	4	0.42	1.86	0.9519	0.7321	0.5128	0.1866
a	c	i	5	0.47	1.89	0.9207	0.7928	0.6228	0.4725	0.2944
a	e	g	5	0.33	1.86	0.9576	0.7653	0.5057	0.3948	0.1488
a	e	i	2	0.41	1.87	0.9641	0.4961
a	g	i	4	0.45	1.83	0.9705	0.7845	0.4525	0.2191
c	e	g	3	0.41	1.88	0.9513	0.7081	0.2274
c	e	i	3	0.48	1.87	0.9563	0.7183	0.286
c	g	i	2	0.54	1.87	0.9652	0.3535
e	g	i	4	0.42	1.84	0.9495	0.764	0.4958	0.2287

## Sheet: e) TITAN results
TITAN results
Sample	Number of Clusters	Normal Proportion, n	Average Tumour Ploidy	Cluster 1	Cluster 2
DG1136a	2	0.32	1.88	0.9672	0.5781
DG1136c	2	0.54	1.89	0.9255	0.6124
DG1136e	1	0.31	1.87	0.9709	NA
DG1136g	2	0.41	1.82	0.9397	0.5107
DG1136i	1	0.59	1.83	0.9566	NA
