# Supplementary material for: TITAN: inference of copy number architectures in clonal cell populations from tumor whole-genome sequence data
Source: HighWire-hosted journal article supplement (doi:10.1101/gr.180281.114), 2014-07-24
Supplement: TITAN_Supp_Tables.zip [file table_S4.xlsx]

## Sheet: a) Serial_Mixture_performance
TITAN
Mixture	Positive Subclonal CNA/LOH prediction positions unique to Sample e	CNA/LOH truth positions unique to Sample e	Subclonal Recall Sample e	Positive Subclonal CNA/LOH prediction positions unique to Sample g	CNA/LOH truth positions unique to Sample g	Subclonal Recall Sample g	All positive Clonal and Subclonal NCA/LOH prediction positions	All CNA/LOH positions	F-measure for all Clonal and Subclonal CNA/LOH	Precision for all Clonal and Subclonal CNA/LOH	Recall for all Clonal and Subclonal CNA/LOH
DG1136_e10_vs_g90	16694	61093	0.382579	174762	195451	0.849554	1641049	1527035	0.897526	0.887397	0.913932
DG1136_e20_vs_g80	19467	61093	0.407366	170045	195451	0.806626	1627426	1527035	0.901365	0.897301	0.912522
DG1136_e30_vs_g70	27763	61093	0.490919	163109	195451	0.743458	1611843	1527035	0.907336	0.907049	0.914236
DG1136_e40_vs_g60	38076	61093	0.612531	157831	195451	0.723246	1618047	1527035	0.908936	0.898028	0.923093
DG1136_e50_vs_g50	49331	61093	0.748353	147150	195451	0.677693	1601590	1527035	0.915892	0.904513	0.929058
DG1136_e60_vs_g40	54248	61093	0.865099	100585	195451	0.437271	1537717	1527035	0.909054	0.917251	0.902618
DG1136_e70_vs_g30	55163	61093	0.868219	80892	195451	0.351031	1536220	1527035	0.895623	0.900082	0.891989
DG1136_e80_vs_g20	56228	61093	0.91995	40181	195451	0.178237	1450862	1527035	0.896352	0.926746	0.868498
DG1136_e90_vs_g10	56650	61093	0.920155	31729	195451	0.142737	1435626	1527035	0.893868	0.926736	0.863586
APOLLOH/HMMcopy
Mixture	Positive Subclonal CNA/LOH prediction positions unique to Sample e	CNA/LOH truth positions unique to Sample e	Subclonal Recall Sample e	Positive Subclonal CNA/LOH prediction positions unique to Sample g	CNA/LOH truth positions unique to Sample g	Subclonal Recall Sample g	All positive Clonal and Subclonal NCA/LOH prediction positions	All CNA/LOH positions	F-measure for all Clonal and Subclonal CNA/LOH	Precision for all Clonal and Subclonal CNA/LOH	Recall for all Clonal and Subclonal CNA/LOH
DG1136_e10_vs_g90	7111	61093	0.159612	108873	195451	0.629522	1369489	1527035	0.929839	0.99477	0.874554
DG1136_e20_vs_g80	14042	61093	0.246286	93560	195451	0.511219	1358805	1527035	0.924182	0.995748	0.864523
DG1136_e30_vs_g70	19637	61093	0.345723	62316	195451	0.341481	1332917	1527035	0.913709	0.995685	0.846704
DG1136_e40_vs_g60	30559	61093	0.450513	32261	195451	0.197231	1312075	1527035	0.910886	0.992282	0.842709
DG1136_e50_vs_g50	36797	61093	0.498032	23280	195451	0.142183	1308916	1527035	0.911236	0.99157	0.84353
DG1136_e60_vs_g40	42393	61093	0.574461	19530	195451	0.117728	1314149	1527035	0.911503	0.986936	0.847309
DG1136_e70_vs_g30	45367	61093	0.598322	14283	195451	0.0810538	1309561	1527035	0.912056	0.988799	0.846858
DG1136_e80_vs_g20	49654	61093	0.648933	11536	195451	0.0671525	1318953	1527035	0.908801	0.977461	0.849991
DG1136_e90_vs_g10	53423	61093	0.733234	8197	195451	0.0507815	1319792	1527035	0.905353	0.970958	0.849622
Control-FreeC
Mixture	Positive Subclonal CNA/LOH prediction positions unique to Sample e	CNA/LOH truth positions unique to Sample e	Subclonal Recall Sample e	Positive Subclonal CNA/LOH prediction positions unique to Sample g	CNA/LOH truth positions unique to Sample g	Subclonal Recall Sample g	All positive Clonal and Subclonal NCA/LOH prediction positions	All CNA/LOH positions	F-measure for all Clonal and Subclonal CNA/LOH	Precision for all Clonal and Subclonal CNA/LOH	Recall for all Clonal and Subclonal CNA/LOH
DG1136_e10_vs_g90	3993	61093	0.126371	33427	195451	0.273253	1131078	1527035	0.832508	0.966366	0.733705
DG1136_e20_vs_g80	5624	61093	0.135587	27633	195451	0.216845	1171773	1527035	0.852489	0.976215	0.757023
DG1136_e30_vs_g70	16542	61093	0.242469	34388	195451	0.270743	1315706	1527035	0.877144	0.937724	0.825809
DG1136_e40_vs_g60	28928	61093	0.444704	23147	195451	0.161361	1294511	1527035	0.881671	0.956259	0.818209
DG1136_e50_vs_g50	43986	61093	0.574268	29402	195451	0.21078	1360974	1527035	0.885688	0.927995	0.850958
DG1136_e60_vs_g40	42799	61093	0.581428	17285	195451	0.095836	1303722	1527035	0.886881	0.957555	0.826387
DG1136_e70_vs_g30	51310	61093	0.673796	21695	195451	0.142215	1360340	1527035	0.882233	0.923967	0.848721
DG1136_e80_vs_g20	49658	61093	0.659786	15229	195451	0.0737618	1337331	1527035	0.88171	0.934767	0.836438
DG1136_e90_vs_g10	49578	61093	0.657982	13199	195451	0.0628776	1274246	1527035	0.885197	0.967402	0.816508
BIC-seq (only CNA, no LOH)
Mixture	Positive Subclonal CNA/LOH prediction positions unique to Sample e	CNA/LOH truth positions unique to Sample e	Subclonal Recall Sample e	Positive Subclonal CNA/LOH prediction positions unique to Sample g	CNA/LOH truth positions unique to Sample g	Subclonal Recall Sample g	All positive Clonal and Subclonal NCA/LOH prediction positions	All CNA/LOH positions	F-measure for all Clonal and Subclonal CNA/LOH	Precision for all Clonal and Subclonal CNA/LOH	Recall for all Clonal and Subclonal CNA/LOH
DG1136_e10_vs_g90	116	44300	0.00149466	4249	122833	0.032483	354309	816577	0.607077	0.976305	0.442182
DG1136_e20_vs_g80	156	44300	0.0075282	4061	122833	0.0294277	392912	816577	0.637048	0.976999	0.472634
DG1136_e30_vs_g70	1133	44300	0.0241236	3532	122833	0.0212435	438770	816577	0.685635	0.977184	0.528123
DG1136_e40_vs_g60	1134	44300	0.0241365	3375	122833	0.0189143	461775	816577	0.700963	0.977932	0.546451
DG1136_e50_vs_g50	2727	44300	0.0611168	3485	122833	0.0189254	492132	816577	0.727397	0.979217	0.579146
DG1136_e60_vs_g40	1440	44300	0.0522784	3385	122833	0.0173582	526879	816577	0.760255	0.980421	0.621391
DG1136_e70_vs_g30	12619	44300	0.19616	3413	122833	0.0177663	570269	816577	0.802071	0.981683	0.678248
DG1136_e80_vs_g20	17466	44300	0.259884	3047	122833	0.0154739	586687	816577	0.814124	0.982257	0.695574
DG1136_e90_vs_g10	17475	44300	0.259921	3115	122833	0.0164928	592168	816577	0.826092	0.981785	0.713024

## Sheet: b) Triplet_Mixture_performance
TITAN
Mixture	All Events found in all samples (Overall Performance)															Events unique to only one sample in the mixture (subclonal 1)												Events present in exactly 2 samples in the mixture (subclonal 2)												Events present in exactly 3 samples in the mixture (subclonal 3)
	Deletions					Gains					LOH					Deletions				Gains				LOH				Deletions				Gains				LOH				Deletions				Gains				LOH
	Number Truth Positions	Number Positive Event Predicted	Precision	Recall	F-Measure	Number Truth Positions	Number Positive Event Predicted	Precision	Recall	F-Measure	Number Truth Positions	Number Positive Event Predicted	Precision	Recall	F-Measure	Number Truth Positions	Number Positive Event Predicted	Recall	F-Measure	Number Truth Positions	Number Positive Event Predicted	Recall	F-Measure	Number Truth Positions	Number Positive Event Predicted	Recall	F-Measure	Number Truth Positions	Number Positive Event Predicted	Recall	F-Measure	Number Truth Positions	Number Positive Event Predicted	Recall	F-Measure	Number Truth Positions	Number Positive Event Predicted	Recall	F-Measure	Number Truth Positions	Number Positive Event Predicted	Recall	F-Measure	Number Truth Positions	Number Positive Event Predicted	Recall	F-Measure	Number Truth Positions	Number Positive Event Predicted
DG1136_a_c	533125	475527	0.964993	0.860736	0.909888	323879	283596	0.939026	0.822233	0.876757	686009	676087	0.982209	0.968003	0.975055	1179	798	0.676845	0.807284	2087	527	0.252516	0.403213	3265	2398	0.734456	0.846901	1786	1690	0.946249	0.972382	1291	1105	0.855926	0.922371	723	693	0.958506	0.978814	431582	430988	0.998624	0.999311	13790	13765	0.998187	0.999093	431712	431468
DG1136_a_e	621862	501240	0.96362	0.776708	0.860127	342263	307997	0.897275	0.807443	0.849992	736149	737694	0.958073	0.960084	0.959078	16024	8412	0.524963	0.688492	8616	7558	0.877205	0.934586	24630	16656	0.676248	0.806859	1216	1047	0.86102	0.92532	10281	616	0.0599164	0.113059	548	529	0.965328	0.982358	439515	438290	0.997213	0.998604	13863	13838	0.998197	0.999098	439691	439307
DG1136_a_g	545311	522973	0.974874	0.93494	0.95449	323216	300866	0.940183	0.87517	0.906512	749115	740932	0.978636	0.967946	0.973262	144	124	0.861111	0.925373	6496	5264	0.810345	0.895238	6356	969	0.152454	0.264573	1521	1234	0.811308	0.895826	14305	9068	0.633904	0.775938	672	658	0.979167	0.989474	449430	447759	0.996282	0.998138	14385	14364	0.99854	0.99927	449575	449388
DG1136_a_i	611611	496742	0.962107	0.78141	0.862395	286291	309160	0.762916	0.823858	0.792216	711609	727895	0.947711	0.9694	0.958433	16214	9369	0.577834	0.73244	8230	7631	0.927217	0.962234	23967	16594	0.692369	0.818224	916	893	0.974891	0.987286	10504	829	0.0789223	0.146298	610	608	0.996721	0.998358	427347	426607	0.998268	0.999133	14957	14933	0.998395	0.999197	427469	427160
DG1136_c_e	534026	507268	0.971455	0.922779	0.946492	266361	297823	0.808463	0.903957	0.853548	731080	714022	0.984888	0.961908	0.973263	745	369	0.495302	0.662478	5320	5210	0.979323	0.989554	5322	874	0.164224	0.282117	407	310	0.761671	0.864714	14017	6817	0.486338	0.654411	294	276	0.938776	0.968421	435981	435098	0.997975	0.998986	15018	14989	0.998069	0.999034	436114	435686
DG1136_c_g	622000	561072	0.960495	0.86641	0.91103	247347	310410	0.700132	0.878636	0.779293	779657	800513	0.942101	0.967302	0.954535	15918	11123	0.698769	0.822677	7746	6499	0.839014	0.912461	23567	17413	0.738872	0.849829	1007	878	0.871897	0.931565	1901	1374	0.722777	0.839084	612	583	0.952614	0.975732	443837	442336	0.996618	0.998306	15567	15423	0.99075	0.995353	444334	443948
DG1136_c_i	549834	504354	0.957431	0.878236	0.916125	318376	273495	0.921498	0.791595	0.851621	718157	735685	0.942571	0.965576	0.953934	20696	12653	0.611374	0.758823	6114	3744	0.612365	0.759586	26810	22526	0.840209	0.913167	825	747	0.905455	0.950382	1554	1333	0.857786	0.92345	97	79	0.814433	0.897727	440024	438753	0.997112	0.998554	57241	57013	0.996017	0.998004	440406	439849
DG1136_e_g	539430	508810	0.979428	0.923833	0.950819	323077	281890	0.94235	0.822216	0.878193	729166	722936	0.97536	0.967027	0.971176	41313	38448	0.930651	0.96408	1066	403	0.378049	0.548673	42378	39536	0.932937	0.965305	3481	2955	0.848894	0.918272	1134	1018	0.897707	0.946097	1832	1811	0.988537	0.994236	437263	435403	0.995746	0.997869	13784	13741	0.99688	0.998438	437419	437190
DG1136_e_i	629190	550914	0.972085	0.85115	0.907606	341631	252123	0.92775	0.684677	0.787892	777283	784480	0.951206	0.960013	0.955589	53788	49216	0.915	0.955613	8917	3434	0.385107	0.556068	62695	58553	0.933934	0.965839	2837	2567	0.904829	0.950037	712	544	0.764045	0.866242	2388	2340	0.979899	0.989848	447409	443641	0.991578	0.995771	13961	13895	0.995273	0.997631	447814	447140
DG1136_g_i	617782	547717	0.96706	0.857382	0.908924	285725	268462	0.92552	0.869602	0.89669	761736	787050	0.939773	0.971003	0.955133	55163	48062	0.871272	0.931209	9276	6659	0.717874	0.83577	63787	59512	0.93298	0.965328	3455	2986	0.864255	0.927185	861	651	0.756098	0.861111	2929	2866	0.978491	0.989129	432869	431208	0.996163	0.998078	14937	14903	0.997724	0.998861	433044	432687
Median	580722	508039	0.966026	0.863573	0.910459	320726	290710	0.923509	0.823045	0.852585	733614	736690	0.95464	0.967165	0.958755	16119	10246	0.687807	0.81498	7121	5237	0.764109	0.865504	24298.5	17034.5	0.736664	0.848365	1368.5	1140.5	0.868076	0.929375	1727.5	1061.5	0.739438	0.850098	642	633	0.97191	0.985743	438389	436846	0.996865	0.99843	14661	14633.5	0.997896	0.998947	438555	438248
APOLLOH
Mixture	All Events found in all samples (Overall Performance)															Events unique to only one sample in the mixture (subclonal 1)												Events present in exactly 2 samples in the mixture (subclonal 2)												Events present in exactly 3 samples in the mixture (subclonal 3)
	Deletions					Gains					LOH					Deletions				Gains				LOH				Deletions				Gains				LOH				Deletions				Gains				LOH
	Number Truth Positions	Number Positive Event Predicted	Precision	Recall	F-Measure	Number Truth Positions	Number Positive Event Predicted	Precision	Recall	F-Measure	Number Truth Positions	Number Positive Event Predicted	Precision	Recall	F-Measure	Number Truth Positions	Number Positive Event Predicted	Recall	F-Measure	Number Truth Positions	Number Positive Event Predicted	Recall	F-Measure	Number Truth Positions	Number Positive Event Predicted	Recall	F-Measure	Number Truth Positions	Number Positive Event Predicted	Recall	F-Measure	Number Truth Positions	Number Positive Event Predicted	Recall	F-Measure	Number Truth Positions	Number Positive Event Predicted	Recall	F-Measure	Number Truth Positions	Number Positive Event Predicted	Recall	F-Measure	Number Truth Positions	Number Positive Event Predicted	Recall	F-Measure	Number Truth Positions	Number Positive Event Predicted
DG1136_a_c	533125	450156	0.999589	0.844025	0.915244	323879	270954	0.978077	0.81825	0.891053	686009	651701	0.989148	0.93968	0.96378	1179	108	0.0916031	0.167832	2087	493	0.236224	0.382171	3265	1013	0.31026	0.473586	1786	1066	0.596865	0.747546	1291	1117	0.865221	0.927741	723	396	0.547718	0.707775	431582	430599	0.997722	0.99886	13790	13785	0.999637	0.999819	431712	430768
DG1136_a_e	621862	456179	0.999329	0.733077	0.845743	342263	265449	0.989452	0.767389	0.864386	736149	662021	0.989517	0.889876	0.937055	16024	8	0.000499251	0.000998004	8616	2505	0.290738	0.450499	24630	1090	0.044255	0.0847589	1216	847	0.696546	0.821134	10281	550	0.0534967	0.10156	548	465	0.84854	0.918065	439515	438676	0.998091	0.999045	13863	13860	0.999784	0.999892	439691	438889
DG1136_a_g	545311	468638	0.998242	0.857885	0.922756	323216	282620	0.985879	0.862052	0.919817	749115	683004	0.989239	0.901936	0.943572	144	41	0.284722	0.443243	6496	5396	0.830665	0.907501	6356	506	0.0796098	0.147479	1521	929	0.610782	0.758367	14305	6033	0.421741	0.593274	672	561	0.834821	0.909976	449430	448869	0.998752	0.999375	14385	14380	0.999652	0.999826	449575	449095
DG1136_a_i	611611	442344	0.999995	0.723241	0.839394	286291	259827	0.881856	0.80034	0.839123	711609	631612	0.988982	0.877804	0.930082	16214	42	0.00259035	0.00516732	8230	2526	0.306926	0.469691	23967	856	0.0357158	0.0689683	916	284	0.310044	0.473333	10504	683	0.0650228	0.122106	610	225	0.368852	0.538922	427347	425608	0.995931	0.997961	14957	14950	0.999532	0.999766	427469	425759
DG1136_c_e	534026	454761	0.99958	0.851213	0.91945	266361	281318	0.878202	0.927516	0.902185	731080	657674	0.990098	0.890685	0.937764	745	152	0.204027	0.338907	5320	5311	0.998308	0.999153	5322	593	0.111424	0.200507	407	182	0.447174	0.617997	14017	6222	0.44389	0.614853	294	268	0.911565	0.953737	435981	435077	0.997927	0.998962	15018	15013	0.999667	0.999834	436114	435247
DG1136_c_g	622000	460321	0.997901	0.738513	0.848833	247347	275232	0.797974	0.887935	0.840554	779657	669176	0.989311	0.849121	0.913871	15918	7	0.000439754	0.000879121	7746	2107	0.272011	0.427687	23567	646	0.0274112	0.0533598	1007	216	0.214499	0.35323	1901	1024	0.538664	0.700171	612	240	0.392157	0.56338	443837	443057	0.998243	0.999121	15567	15484	0.994668	0.997327	444334	443596
DG1136_c_i	549834	449157	1	0.816896	0.899221	318376	227269	0.999996	0.713835	0.833025	718157	653832	0.988881	0.900307	0.942518	20696	3	0.000144956	0.000289869	6114	76	0.0124305	0.0245557	26810	1206	0.0449832	0.0860937	825	465	0.563636	0.72093	1554	1436	0.924067	0.960535	97	18	0.185567	0.313043	440024	439356	0.998482	0.99924	57241	57176	0.998864	0.999432	440406	439709
DG1136_e_g	539430	457988	1	0.849022	0.918347	323077	234651	0.999689	0.726075	0.841191	729166	672367	0.988352	0.911363	0.948297	41313	23	0.000556725	0.00111283	1066	60	0.0562852	0.106572	42378	1274	0.0300628	0.0583708	3481	2367	0.679977	0.809508	1134	1058	0.932981	0.965328	1832	1415	0.77238	0.871574	437263	436899	0.999168	0.999584	13784	13773	0.999202	0.999601	437419	437035
DG1136_e_i	629190	465739	1	0.74022	0.85072	341631	219626	1	0.642875	0.782622	777283	674560	0.988361	0.857743	0.918431	53788	8	0.000148732	0.00029742	8917	1636	0.18347	0.310054	62695	2871	0.0457931	0.0875759	2837	1922	0.677476	0.807733	712	658	0.924157	0.960584	2388	1843	0.771776	0.871189	447409	447028	0.999148	0.999574	13961	13956	0.999642	0.999821	447814	447351
DG1136_g_i	617782	450982	0.999996	0.729999	0.843928	285725	236920	0.99973	0.828965	0.906374	761736	658897	0.989237	0.855684	0.917626	55163	0	0	NaN	9276	2574	0.27749	0.43443	63787	3320	0.0520482	0.0989465	3455	1916	0.554559	0.713461	861	706	0.819977	0.901085	2929	1773	0.605326	0.754147	432869	432298	0.998681	0.99934	14937	14928	0.999397	0.999699	433044	432487
Median	580722	433532	0.995214	0.714552	0.831955	320726	235110	0.991686	0.762808	0.853144	733614	565036	0.993056	0.736782	0.846115	580722	455470	0.778558	0.874971	320726	262638	0.809295	0.852789	733614	660459	0.89028	0.93741	580722	455470	0.778558	0.874971	320726	262638	0.809295	0.852789	733614	660459	0.89028	0.93741	580722	455470	0.778558	0.874971	320726	262638	0.809295	0.852789	733614	660459
Control-FreeC
Mixture	All Events found in all samples (Overall Performance)															Events unique to only one sample in the mixture (subclonal 1)												Events present in exactly 2 samples in the mixture (subclonal 2)												Events present in exactly 3 samples in the mixture (subclonal 3)
	Deletions					Gains					LOH					Deletions				Gains				LOH				Deletions				Gains				LOH				Deletions				Gains				LOH
	Number Truth Positions	Number Positive Event Predicted	Precision	Recall	F-Measure	Number Truth Positions	Number Positive Event Predicted	Precision	Recall	F-Measure	Number Truth Positions	Number Positive Event Predicted	Precision	Recall	F-Measure	Number Truth Positions	Number Positive Event Predicted	Recall	F-Measure	Number Truth Positions	Number Positive Event Predicted	Recall	F-Measure	Number Truth Positions	Number Positive Event Predicted	Recall	F-Measure	Number Truth Positions	Number Positive Event Predicted	Recall	F-Measure	Number Truth Positions	Number Positive Event Predicted	Recall	F-Measure	Number Truth Positions	Number Positive Event Predicted	Recall	F-Measure	Number Truth Positions	Number Positive Event Predicted	Recall	F-Measure	Number Truth Positions	Number Positive Event Predicted	Recall	F-Measure	Number Truth Positions	Number Positive Event Predicted
DG1136_a_c	533125	453823	0.995218	0.84718	0.915252	323879	277300	0.964948	0.826173	0.890184	686009	589010	0.99353	0.853049	0.917946	1179	278	0.235793	0.381606	2087	619	0.296598	0.457502	3265	450	0.137825	0.242261	1786	711	0.398096	0.569483	1291	1129	0.874516	0.933058	723	162	0.224066	0.366102	431582	431275	0.999289	0.999644	13790	13758	0.997679	0.998838	431712	431326
DG1136_a_e	621862	455215	0.996758	0.729646	0.842538	342263	257628	0.992291	0.746917	0.852295	736149	586120	0.995008	0.792223	0.882111	16024	159	0.00992262	0.0196503	8616	2541	0.294916	0.455499	24630	291	0.0118149	0.0233538	1216	213	0.175164	0.298111	10281	2205	0.214473	0.353196	548	74	0.135036	0.237942	439515	437641	0.995736	0.997864	13863	13818	0.996754	0.998374	439691	438142
DG1136_a_g	545311	384426	0.997035	0.702876	0.824504	323216	207531	0.999648	0.641856	0.781759	749115	517103	0.993585	0.685857	0.811529	144	84	0.583333	0.736842	6496	4080	0.628079	0.771558	6356	116	0.0182505	0.0358467	1521	707	0.464826	0.63465	14305	2081	0.145474	0.253997	672	542	0.806548	0.892916	449430	375550	0.835614	0.910446	14385	14329	0.996107	0.99805	449575	376386
DG1136_a_i	611611	446862	0.994141	0.726351	0.839405	286291	248399	0.91913	0.797479	0.853994	711609	582374	0.991074	0.811086	0.892092	16214	177	0.0109165	0.0215972	8230	2578	0.313244	0.477054	23967	253	0.0105562	0.0208918	916	262	0.286026	0.444822	10504	1379	0.131283	0.232096	610	105	0.172131	0.293706	427347	425240	0.99507	0.997529	14957	14921	0.997593	0.998795	427469	426042
DG1136_c_e	534026	458347	0.99445	0.853522	0.918612	266361	276799	0.910213	0.945882	0.927705	731080	604899	0.99302	0.82163	0.899231	745	289	0.387919	0.558994	5320	5247	0.986278	0.993092	5322	652	0.12251	0.218279	407	171	0.420147	0.591696	14017	5647	0.402868	0.574349	294	190	0.646259	0.785124	435981	433953	0.995348	0.997669	15018	14961	0.996205	0.998099	436114	435021
DG1136_c_g	622000	420203	0.995457	0.672498	0.802711	247347	192898	0.998502	0.7787	0.875008	779657	553013	0.993092	0.704403	0.8242	15918	1	6.2822e-05	0.000125636	7746	1970	0.254325	0.405517	23567	116	0.00492214	0.00979606	1007	6	0.00595829	0.011846	1901	190	0.0999474	0.181731	612	4	0.00653595	0.012987	443837	410299	0.924436	0.960735	15567	15273	0.981114	0.990467	444334	417874
DG1136_c_i	549834	279731	0.998223	0.507851	0.673206	318376	221822	0.996943	0.6946	0.818752	718157	520757	0.992841	0.719939	0.834649	20696	37	0.00178779	0.00356919	6114	22	0.0035983	0.0071708	26810	149	0.00555763	0.0110538	825	267	0.323636	0.489011	1554	1275	0.820463	0.901379	97	7	0.0721649	0.134615	440024	272181	0.618559	0.764333	57241	57178	0.998899	0.999449	440406	378234
DG1136_e_g	539430	5064	0.967022	0.0090781	0.0179873	323077	171851	0.999342	0.53157	0.693992	729166	145261	0.978122	0.194857	0.324974	41313	0	0	NaN	1066	95	0.0891182	0.163652	42378	273	0.00644202	0.0128016	3481	0	0	NaN	1134	592	0.522046	0.685979	1832	24	0.0131004	0.0258621	437263	4029	0.00921413	0.01826	13784	13750	0.997533	0.998765	437419	8795
DG1136_e_i	629190	28	0.678571	3.01976e-05	6.03924e-05	341631	174358	0.991082	0.505818	0.669793	777283	129338	0.973233	0.161944	0.277682	53788	0	0	NaN	8917	1125	0.126164	0.224059	62695	353	0.00563043	0.0111978	2837	0	0	NaN	712	446	0.626404	0.770294	2388	6	0.00251256	0.00501253	447409	10	2.23509e-05	4.47008e-05	13961	13846	0.991763	0.995864	447814	3004
DG1136_g_i	617782	450811	0.995209	0.726229	0.839704	285725	251107	0.984019	0.864797	0.920564	761736	577060	0.994806	0.753625	0.857581	55163	10	0.000181281	0.000362496	9276	3677	0.396399	0.567745	63787	267	0.00418581	0.00833672	3455	420	0.121563	0.216774	861	407	0.472706	0.641956	2929	157	0.0536019	0.10175	432869	430517	0.994566	0.997276	14937	14894	0.997121	0.998559	433044	431493
Median	580722	433532	0.995214	0.714552	0.831955	320726	235110	0.991686	0.762808	0.853144	733614	565036	0.993056	0.736782	0.846115	580722	433532	0.714552	0.831955	320726	235110	0.762808	0.853144	733614	565036	0.736782	0.846115	580722	433532	0.714552	0.831955	320726	235110	0.762808	0.853144	733614	565036	0.736782	0.846115	580722	433532	0.714552	0.831955	320726	235110	0.762808	0.853144	733614	565036
BIC-seq
Mixture	All Events found in all samples (Overall Performance)										Events unique to only one sample in the mixture (subclonal 1)								Events present in exactly 2 samples in the mixture (subclonal 2)								Events present in exactly 3 samples in the mixture (subclonal 3)
	Deletions					Gains					Deletions				Gains				Deletions				Gains				Deletions				Gains
	Number Truth Positions	Number Positive Event Predicted	Precision	Recall	F-Measure	Number Truth Positions	Number Positive Event Predicted	Precision	Recall	F-Measure	Number Truth Positions	Number Positive Event Predicted	Recall	F-Measure	Number Truth Positions	Number Positive Event Predicted	Recall	F-Measure	Number Truth Positions	Number Positive Event Predicted	Recall	F-Measure	Number Truth Positions	Number Positive Event Predicted	Recall	F-Measure	Number Truth Positions	Number Positive Event Predicted	Recall	F-Measure	Number Truth Positions	Number Positive Event Predicted	Recall	F-Measure
DG1136_a_c	533125	449683	0.998523	0.84224	0.913747	323879	187478	0.999749	0.578707	0.733073	1179	33	0.0279898	0.0544554	2087	41	0.0196454	0.0385338	1786	430	0.240761	0.388087	1291	966	0.748257	0.856004	431582	430942	0.998517	0.999258	13790	13764	0.998115	0.999056
DG1136_a_e	621862	430583	0.998119	0.691107	0.816713	342263	122633	0.999576	0.358149	0.527348	16024	100	0.00624064	0.0124039	8616	25	0.00290158	0.00578637	1216	303	0.249178	0.398947	10281	30	0.002918	0.00581903	439515	416131	0.946796	0.972671	13863	13818	0.996754	0.998374
DG1136_a_g	545311	79586	0.999937	0.145937	0.254701	323216	105602	0.999924	0.326698	0.492489	144	0	0	NaN	6496	11	0.00169335	0.00338097	1521	0	0	NaN	14305	39	0.00272632	0.00543781	449430	77584	0.172628	0.294429	14385	14334	0.996455	0.998224
DG1136_a_i	611611	443401	0.998205	0.723671	0.839052	286291	174619	0.999966	0.609914	0.757688	16214	60	0.00370051	0.00737372	8230	1873	0.227582	0.370781	916	128	0.139738	0.245211	10504	217	0.0206588	0.0404813	427347	425564	0.995828	0.99791	14957	14933	0.998395	0.999197
DG1136_c_e	534026	372949	0.998466	0.697301	0.821141	266361	163459	0.999969	0.613656	0.76057	745	39	0.052349	0.0994898	5320	2602	0.489098	0.656905	407	0	0	NaN	14017	0	0	NaN	435981	364055	0.835025	0.910097	15018	14956	0.995872	0.997932
DG1136_c_g	622000	197194	0.999975	0.317024	0.481422	247347	116637	0.999811	0.471463	0.64077	15918	1	6.2822e-05	0.000125636	7746	1	0.000129099	0.000258164	1007	2	0.0019861	0.00396432	1901	0	0	NaN	443837	194146	0.437426	0.608624	15567	15231	0.978416	0.98909
DG1136_c_i	549834	314908	0.999	0.57216	0.7276	318376	129766	0.999684	0.407458	0.578946	20696	0	0	NaN	6114	21	0.00343474	0.00684597	825	33	0.04	0.0769231	1554	877	0.56435	0.721514	440024	310106	0.704748	0.826806	57241	57154	0.99848	0.999239
DG1136_e_g	539430	86696	0.999769	0.160681	0.276864	323077	109475	0.9999	0.338817	0.506131	41313	0	0	NaN	1066	4	0.00375235	0.00747664	3481	0	0	NaN	1134	302	0.266314	0.420613	437263	83424	0.190787	0.320438	13784	13734	0.996373	0.998183
DG1136_e_i	629190	20470	1	0.0325339	0.0630176	341631	107280	0.999497	0.313865	0.477716	53788	0	0	NaN	8917	38	0.00426152	0.00848688	2837	0	0	NaN	712	29	0.0407303	0.0782726	447409	20007	0.0447175	0.0856068	13961	13800	0.988468	0.9942
DG1136_g_i	617782	196587	0.999888	0.318179	0.482742	285725	131252	0.999893	0.459316	0.629474	55163	0	0	NaN	9276	43	0.00463562	0.00922846	3455	106	0.0306802	0.0595338	861	142	0.164925	0.283151	432869	191284	0.441898	0.612939	14937	14878	0.99605	0.998021
Median	580722	256051	0.999385	0.445169	0.605171	320726	126200	0.999852	0.433387	0.60421	580722	256051	0.445169	0.605171	320726	126200	0.433387	0.60421	580722	256051	0.445169	0.605171	320726	126200	0.433387	0.60421	580722	256051	0.445169	0.605171	320726	126200	0.433387	0.60421
[truncated: 2 more columns]

## Sheet: c) Pairwise_Mixture_performance
TITAN
Mixture	All Events found in all samples (Overall Performance)															Events unique to only one sample in the mixture (subclonal 1)												Events present in exactly 2 samples in the mixture (subclonal 2)
	Deletions					Gains					LOH					Deletions				Gains				LOH				Deletions				Gains				LOH
	Number Truth Positions	Number Positive Event Predicted	Precision	Recall	F-Measure	Number Truth Positions	Number Positive Event Predicted	Precision	Recall	F-Measure	Number Truth Positions	Number Positive Event Predicted	Precision	Recall	F-Measure	Number Truth Positions	Number Positive Event Predicted	Recall	F-Measure	Number Truth Positions	Number Positive Event Predicted	Recall	F-Measure	Number Truth Positions	Number Positive Event Predicted	Recall	F-Measure	Number Truth Positions	Number Positive Event Predicted	Recall	F-Measure	Number Truth Positions	Number Positive Event Predicted	Recall	F-Measure	Number Truth Positions	Number Positive Event Predicted	Recall	F-Measure
DG1136_a_c	550325	492474	0.965115	0.863661	0.911574	324902	284462	0.941736	0.824519	0.879238	708271	700799	0.984746	0.974357	0.979524	3211	2505	0.780131	0.876487	9187	5826	0.634157	0.776127	12113	5971	0.492941	0.660363	454765	453653	0.997555	0.998776	14431	14419	0.999168	0.999584	454954	454771	0.999598	0.999799
DG1136_a_e	538084	487165	0.954769	0.864419	0.90735	267857	282496	0.817254	0.861919	0.838992	668912	684661	0.96276	0.985427	0.973962	1472	1277	0.867527	0.929065	8233	6543	0.794729	0.885625	8845	3806	0.4303	0.601692	440407	439984	0.99904	0.99952	15082	15071	0.999271	0.999635	440578	440326	0.999428	0.999714
DG1136_a_g	626416	572224	0.947863	0.865862	0.905009	248510	315250	0.643416	0.816213	0.719586	730714	806285	0.891289	0.983467	0.935112	18320	16264	0.887773	0.940551	11460	7558	0.659511	0.794826	29683	26200	0.88266	0.937673	448598	447838	0.998306	0.999152	15688	15349	0.978391	0.989078	449199	448907	0.99935	0.999675
DG1136_a_i	540333	534757	0.953383	0.943544	0.948438	203814	313145	0.624133	0.958933	0.75613	756441	751251	0.985251	0.978491	0.98186	0	0	NaN	NaN	0	0	NaN	NaN	0	0	NaN	NaN	486984	461214	0.947082	0.972822	36264	30463	0.840034	0.913064	506962	506619	0.999323	0.999662
DG1136_c_e	471621	483144	0.967718	0.991362	0.979397	289335	286328	0.934736	0.925021	0.929853	686092	687478	0.979228	0.981207	0.980217	3686	3529	0.957406	0.97824	1367	847	0.619605	0.765131	5050	4811	0.952673	0.975763	453496	452291	0.997343	0.99867	60824	60663	0.997353	0.998675	454014	453533	0.998941	0.99947
DG1136_c_g	565303	561850	0.958562	0.952707	0.955625	319313	282168	0.886894	0.783723	0.832123	737022	790307	0.909352	0.975096	0.941077	19124	18179	0.950586	0.974667	17591	14604	0.830197	0.907222	36702	34838	0.949213	0.973945	464026	461075	0.99364	0.99681	57974	57498	0.991789	0.995878	465168	464161	0.997835	0.998916
DG1136_c_i	559398	526981	0.986982	0.929787	0.957531	323980	272498	0.942389	0.792638	0.861051	752943	746881	0.983759	0.975839	0.979783	42189	41622	0.98656	0.993235	16688	15460	0.926414	0.961802	58450	56884	0.973208	0.986422	465181	459425	0.987626	0.993775	14633	14572	0.995831	0.997911	465774	465097	0.998547	0.999273
DG1136_e_g	553859	539643	0.958033	0.933443	0.945579	262718	276847	0.882003	0.929438	0.905099	710458	765548	0.911186	0.981841	0.945195	22355	20165	0.902035	0.948495	17871	14337	0.802249	0.890276	38476	35610	0.925512	0.961315	448866	447457	0.996861	0.998428	62656	62478	0.997159	0.998578	449332	448674	0.998536	0.999267
DG1136_e_i	545467	522039	0.976544	0.934601	0.955112	266991	273139	0.94029	0.961943	0.950993	733757	734189	0.981615	0.982193	0.981904	44599	43388	0.972847	0.986237	17115	15423	0.901139	0.947999	60691	59049	0.972945	0.986287	447311	445721	0.996445	0.99822	15063	15020	0.997145	0.998571	447532	447177	0.999207	0.999603
DG1136_g_i	635430	609627	0.957118	0.918252	0.937282	248131	251405	0.882019	0.893657	0.8878	771969	841751	0.898804	0.980051	0.937671	57361	56038	0.976936	0.988333	8031	3190	0.397211	0.568577	65231	64257	0.985068	0.992478	459470	455699	0.991793	0.995879	16466	16294	0.989554	0.99475	461187	460394	0.998281	0.99914
Median	552092	530869	0.958298	0.931615	0.947008	267424	282332	0.884456	0.877788	0.870145	732236	749066	0.970994	0.980629	0.976743	18722	17221.5	0.950586	0.974667	10323.5	7050.5	0.794729	0.885625	33192.5	30519	0.949213	0.973945	454130	452972	0.996653	0.998324	16077	15821.5	0.996488	0.998241	454484	454152	0.999074	0.999537
APOLLOH
Mixture	All Events found in all samples															Events unique to only one sample in the mixture (subclonal 1)												Events present in exactly 2 samples in the mixture (subclonal 2)
	Deletions					Gains					LOH					Deletions				Gains				LOH				Deletions				Gains				LOH
	Number Truth Positions	Number Positive Event Predicted	Precision	Recall	F-Measure	Number Truth Positions	Number Positive Event Predicted	Precision	Recall	F-Measure	Number Truth Positions	Number Positive Event Predicted	Precision	Recall	F-Measure	Number Truth Positions	Number Positive Event Predicted	Recall	F-Measure	Number Truth Positions	Number Positive Event Predicted	Recall	F-Measure	Number Truth Positions	Number Positive Event Predicted	Recall	F-Measure	Number Truth Positions	Number Positive Event Predicted	Recall	F-Measure	Number Truth Positions	Number Positive Event Predicted	Recall	F-Measure	Number Truth Positions	Number Positive Event Predicted	Recall	F-Measure
DG1136_a_c	550325	472741	0.996446	0.855969	0.920881	324902	267275	0.974839	0.801934	0.879973	708271	683725	0.992279	0.95789	0.974782	3211	1078	0.335721	0.502681	9187	5553	0.604441	0.75346	12113	4679	0.386279	0.557289	454765	454396	0.999189	0.999594	14431	14410	0.998545	0.999272	454954	454711	0.999466	0.999733
DG1136_a_e	538084	456405	0.998376	0.846827	0.916378	267857	273400	0.841957	0.85938	0.850579	668912	643102	0.991132	0.952889	0.971634	1472	461	0.313179	0.476979	8233	6494	0.788777	0.881918	8845	2624	0.296665	0.457581	440407	438426	0.995502	0.997746	15082	15082	1	1	440578	439027	0.99648	0.998237
DG1136_a_g	626416	463318	0.99561	0.736386	0.846599	248510	268825	0.717009	0.775623	0.745165	730714	661092	0.992112	0.897584	0.942483	18320	343	0.0187227	0.0367572	11460	2385	0.208115	0.344529	29683	5167	0.174073	0.296528	448598	447276	0.997053	0.998524	15688	15402	0.98177	0.990801	449199	447613	0.996469	0.998232
DG1136_a_i	540333	477983	0.975692	0.863105	0.915951	203814	302828	0.653718	0.971297	0.781475	756441	693250	0.992076	0.909201	0.948833	0	0	NaN	NaN	0	0	NaN	NaN	0	0	NaN	NaN	486984	461997	0.94869	0.97367	36264	35592	0.981469	0.990648	506962	506734	0.99955	0.999775
DG1136_c_e	471621	463206	0.999722	0.981884	0.990722	289335	243691	0.999971	0.842221	0.914342	686092	671402	0.991828	0.970591	0.981095	3686	536	0.145415	0.253908	1367	572	0.418435	0.589995	5050	1899	0.37604	0.546553	453496	453291	0.999548	0.999774	60824	60816	0.999868	0.999934	454014	453796	0.99952	0.99976
DG1136_c_g	565303	470218	0.999809	0.831639	0.908003	319313	213509	0.999995	0.668648	0.801423	737022	692605	0.991256	0.931518	0.960459	19124	208	0.0108764	0.0215187	17591	1737	0.0987437	0.179739	36702	14115	0.384584	0.555523	464026	463772	0.999453	0.999726	57974	57930	0.999241	0.99962	465168	464790	0.999187	0.999594
DG1136_c_i	559398	485395	0.998449	0.866363	0.927728	323980	227391	0.999301	0.701377	0.824244	752943	708319	0.98946	0.930818	0.959243	42189	1014	0.0240347	0.0469412	16688	12141	0.727529	0.842277	58450	15330	0.262275	0.41556	465181	465016	0.999645	0.999823	14633	14624	0.999385	0.999692	465774	465549	0.999517	0.999758
DG1136_e_g	553859	452813	0.999993	0.817555	0.899618	262718	225977	0.999823	0.859998	0.924654	710458	649715	0.992001	0.907187	0.9477	22355	122	0.00545739	0.0108555	17871	2871	0.160651	0.27683	38476	11519	0.299381	0.460806	448866	448133	0.998367	0.999183	62656	62646	0.99984	0.99992	449332	448656	0.998496	0.999247
DG1136_e_i	545467	464742	0.999978	0.851989	0.920071	266991	252625	0.999865	0.946066	0.972222	733757	678505	0.992164	0.917454	0.953347	44599	729	0.0163457	0.0321655	17115	13902	0.81227	0.896412	60691	16902	0.278493	0.435658	447311	447110	0.999551	0.999775	15063	15059	0.999734	0.999867	447532	447334	0.999558	0.999779
DG1136_g_i	635430	477435	0.999858	0.75125	0.857906	248131	217393	0.997603	0.874022	0.931733	771969	692678	0.991721	0.889858	0.938032	57361	907	0.0158121	0.031132	8031	2028	0.252521	0.403221	65231	6356	0.0974383	0.177574	459470	459298	0.999626	0.999813	16466	16434	0.998057	0.999027	461187	460710	0.998966	0.999483
Median	552092	451003	0.994486	0.779935	0.874161	267424	237992	0.982548	0.786725	0.84528	732236	584376	0.991426	0.804	0.888561	552092	467480	0.849408	0.916165	267424	248158	0.850801	0.865276	732236	681115	0.924136	0.956295	552092	467480	0.849408	0.916165	267424	248158	0.850801	0.865276	732236	681115	0.924136	0.956295
Control-FreeC
Mixture	All Events found in all samples															Events unique to only one sample in the mixture (subclonal 1)												Events present in exactly 2 samples in the mixture (subclonal 2)
	Deletions					Gains					LOH					Deletions				Gains				LOH				Deletions				Gains				LOH
	Number Truth Positions	Number Positive Event Predicted	Precision	Recall	F-Measure	Number Truth Positions	Number Positive Event Predicted	Precision	Recall	F-Measure	Number Truth Positions	Number Positive Event Predicted	Precision	Recall	F-Measure	Number Truth Positions	Number Positive Event Predicted	Recall	F-Measure	Number Truth Positions	Number Positive Event Predicted	Recall	F-Measure	Number Truth Positions	Number Positive Event Predicted	Recall	F-Measure	Number Truth Positions	Number Positive Event Predicted	Recall	F-Measure	Number Truth Positions	Number Positive Event Predicted	Recall	F-Measure	Number Truth Positions	Number Positive Event Predicted	Recall	F-Measure
DG1136_a_c	550325	471223	0.996993	0.853688	0.919792	324902	265274	0.974393	0.795566	0.875945	708271	605785	0.99412	0.850272	0.916587	3211	743	0.231392	0.375822	9187	5553	0.604441	0.75346	12113	1743	0.143895	0.251588	454765	453283	0.996741	0.998368	14431	14373	0.995981	0.997986	454954	453579	0.996978	0.998487
DG1136_a_e	538084	466709	0.984986	0.854331	0.915018	267857	263809	0.843933	0.831179	0.837507	668912	602081	0.986266	0.887728	0.934406	1472	549	0.372962	0.543295	8233	6212	0.754524	0.86009	8845	1461	0.165178	0.283524	440407	438866	0.996501	0.998247	15082	15033	0.996751	0.998373	440578	438914	0.996223	0.998108
DG1136_a_g	626416	463973	0.993457	0.735832	0.845454	248510	274168	0.705086	0.777884	0.739698	730714	602782	0.991486	0.817899	0.896366	18320	380	0.0207424	0.0406417	11460	2324	0.202792	0.337203	29683	3571	0.120305	0.214771	448598	446008	0.994226	0.997105	15688	15316	0.976288	0.988002	449199	447066	0.995252	0.99762
DG1136_a_i	540333	472766	0.978089	0.855782	0.912856	203814	240110	0.778377	0.916993	0.842018	756441	600721	0.994913	0.790101	0.880757	0	0	NaN	NaN	0	0	NaN	NaN	0	0	NaN	NaN	486984	456698	0.937809	0.967907	36264	34325	0.946531	0.972531	506962	500784	0.987814	0.993869
DG1136_c_e	471621	445719	0.995066	0.940416	0.96697	289335	235875	0.996642	0.812494	0.895196	686092	579283	0.994006	0.839262	0.910103	3686	346	0.0938687	0.171627	1367	287	0.209949	0.347037	5050	477	0.0944554	0.172607	453496	435556	0.960441	0.979821	60824	60747	0.998734	0.999367	454014	435912	0.960129	0.979659
DG1136_c_g	565303	3660	0.995902	0.00644787	0.0128128	319313	194959	0.998995	0.609944	0.757432	737022	133554	0.977492	0.177129	0.299912	19124	0	0	NaN	17591	3205	0.182195	0.308232	36702	364	0.00991772	0.0196406	464026	3447	0.00742846	0.0147474	57974	57686	0.995032	0.99751	465168	6597	0.014182	0.0279673
DG1136_c_i	559398	271	0.95941	0.000464785	0.000929121	323980	174806	0.990704	0.534542	0.69441	752943	78030	0.959118	0.0993966	0.180126	42189	0	0	NaN	16688	7792	0.466922	0.636601	58450	354	0.00605646	0.01204	465181	145	0.000311707	0.000623219	14633	14503	0.991116	0.995538	465774	2673	0.00573883	0.0114122
DG1136_e_g	553859	456287	0.993905	0.818811	0.897902	262718	241776	0.961729	0.885067	0.921807	710458	589468	0.991367	0.822538	0.899096	22355	543	0.0242899	0.0474277	17871	8274	0.462985	0.632932	38476	8055	0.209351	0.346221	448866	444781	0.990899	0.995429	62656	62421	0.996249	0.998121	449332	446536	0.993777	0.996879
DG1136_e_i	545467	405177	0.997645	0.741059	0.850419	266991	203706	0.991812	0.756722	0.858463	733757	527265	0.991522	0.712491	0.829161	44599	127	0.0028476	0.00567902	17115	10055	0.587496	0.740155	60691	409	0.00673906	0.0133879	447311	395647	0.884501	0.938711	15063	15005	0.99615	0.998071	447532	396654	0.886314	0.939731
DG1136_g_i	635430	2563	0.995708	0.00401618	0.00800009	248131	184097	0.996116	0.739053	0.848543	771969	123260	0.969966	0.154874	0.2671	57361	0	0	NaN	8031	801	0.0997385	0.181386	65231	627	0.00961199	0.019041	459470	2443	0.005317	0.0105777	16466	15865	0.963501	0.981411	461187	7215	0.0156444	0.0308069
Median	552092	451003	0.994486	0.779935	0.874161	267424	237992	0.982548	0.786725	0.84528	732236	584376	0.991426	0.804	0.888561	552092	451003	0.779935	0.874161	267424	237992	0.786725	0.84528	732236	584376	0.804	0.888561	552092	451003	0.779935	0.874161	267424	237992	0.786725	0.84528	732236	584376	0.804	0.888561
BIC-seq
Mixture	All Events found in all samples										Events unique to only one sample in the mixture (subclonal 1)								Events present in 2 samples in the mixture (subclonal 2)
	Deletions					Gains					Deletions				Gains				Deletions				Gains
	Number Truth Positions	Number Positive Event Predicted	Precision	Recall	F-Measure	Number Truth Positions	Number Positive Event Predicted	Precision	Recall	F-Measure	Number Truth Positions	Number Positive Event Predicted	Recall	F-Measure	Number Truth Positions	Number Positive Event Predicted	Recall	F-Measure	Number Truth Positions	Number Positive Event Predicted	Recall	F-Measure	Number Truth Positions	Number Positive Event Predicted	Recall	F-Measure
DG1136_a_c	550325	470759	0.997525	0.853303	0.919795	324902	173630	0.999366	0.534069	0.696124	3211	545	0.169729	0.290202	9187	3864	0.420594	0.592139	454765	453855	0.997999	0.998998	14431	14377	0.996258	0.998126
DG1136_a_e	538084	460196	0.998664	0.854106	0.920746	267857	218494	0.999213	0.815069	0.897796	1472	561	0.381114	0.551894	8233	5952	0.722944	0.839196	440407	438705	0.996135	0.998064	15082	15075	0.999536	0.999768
DG1136_a_g	626416	455919	0.997151	0.725748	0.840073	248510	156773	0.992556	0.626156	0.767888	18320	305	0.0166485	0.0327517	11460	1200	0.104712	0.189573	448598	440148	0.981164	0.990492	15688	15284	0.974248	0.986956
DG1136_a_i	540333	199883	0.997944	0.369165	0.538956	203814	110020	0.999873	0.539737	0.701046	0	0	NaN	NaN	0	0	NaN	NaN	486984	196719	0.403954	0.575452	36264	16276	0.44882	0.619566
DG1136_c_e	471621	447422	0.998319	0.947095	0.972033	289335	156589	0.999898	0.541148	0.702241	3686	243	0.0659251	0.123696	1367	118	0.0863204	0.158923	453496	438680	0.967329	0.983393	60824	60713	0.998175	0.999087
DG1136_c_g	565303	78160	0.999156	0.138145	0.24273	319313	102012	0.998853	0.319107	0.483688	19124	92	0.00481071	0.00957535	17591	957	0.0544028	0.103192	464026	75949	0.163674	0.281306	57974	57339	0.989047	0.994493
DG1136_c_i	559398	1290	1	0.00230605	0.00460149	323980	97711	0.999816	0.30154	0.463339	42189	0	0	NaN	16688	3083	0.184744	0.311871	465181	1081	0.00232383	0.00463688	14633	14446	0.987221	0.993569
DG1136_e_g	553859	442143	0.998007	0.796705	0.886066	262718	166338	0.999784	0.633006	0.7752	22355	228	0.0101991	0.0201922	17871	2045	0.114431	0.205363	448866	434474	0.967937	0.983707	62656	62428	0.996361	0.998177
DG1136_e_i	545467	182484	0.999868	0.334502	0.501297	266991	139220	0.999964	0.521422	0.685432	44599	0	0	NaN	17115	7361	0.430091	0.601487	447311	177952	0.397826	0.569207	15063	14958	0.993029	0.996502
DG1136_g_i	635430	36382	1	0.0572557	0.10831	248131	135016	0.999474	0.543846	0.704403	57361	0	0	NaN	8031	635	0.0790686	0.14655	459470	36114	0.0785993	0.145743	16466	15502	0.941455	0.969845
Median	552092	321013	0.998491	0.547456	0.689514	267424	147904	0.999629	0.540443	0.701643	552092	321013	0.547456	0.689514	267424	147904	0.540443	0.701643	552092	321013	0.547456	0.689514	267424	147904	0.540443	0.701643
