# Supplementary material for: TITAN: inference of copy number architectures in clonal cell populations from tumor whole-genome sequence data
Source: HighWire-hosted journal article supplement (doi:10.1101/gr.180281.114), 2014-07-24
Supplement: TITAN_Supp_Tables.zip [file table_S5.xlsx]

## Sheet: a) DG1136 sample info
Sample	Site	Coverage	Gigabases sequenced	Cellularity (Pathologist)	Control-FREEC Tumour Content Estimate	Cellularity (Estimated+Pathologist)	Normal Contamination
DG1136a	Right Ovary Site 1	33.9238	110.925	0.6	0.648843	0.624421	0.375579
DG1136c	Right Ovary Site 2	34.6997	109.132	0.25	0.626645	0.438323	0.561678
DG1136e	Right Ovary Site 3	31.8637	99.5886	0.7	0.6979	0.69895	0.30105
DG1136g	Right Ovary Site 4	29.5289	94.116	0.65	0.746093	0.698047	0.301953
DG1136i	Left Pelvic Sidewall Site 1	35.2803	110.554	0.5	0.59985	0.549925	0.450075

## Sheet: b) Serial Mixture
Individual								Merge				TITAN Results
DG1136e	DG1136g	% tumour of e	% tumour of g	% normal of e	% normal of g	Total		% tumour	% normal	Total		Number of Clusters	Normal Proportion, n	Average Tumour Ploidy	Cluster 1	Cluster 2	Cluster 3	Cluster 4
0.1	0.9	0.069895	0.628242	0.030105	0.271758	1		0.698137	0.301863	1		4	0.4	1.8	0.9539	0.737	0.5159	0.187
0.2	0.8	0.13979	0.558437	0.06021	0.241563	1		0.698227	0.301773	1		4	0.38	1.8	0.9506	0.7076	0.5026	0.1806
0.3	0.7	0.209685	0.488633	0.090315	0.211367	1		0.698318	0.301682	1		3	0.39	1.81	0.9711	0.57	0.2407
0.4	0.6	0.27958	0.418828	0.12042	0.181172	1		0.698408	0.301592	1		3	0.38	1.82	0.9681	0.599	0.2555
0.5	0.5	0.349475	0.349023	0.150525	0.150977	1		0.698498	0.301502	1		3	0.38	1.82	0.9861	0.619	0.2577
0.6	0.4	0.41937	0.279219	0.18063	0.120781	1		0.698589	0.301411	1		3	0.36	1.82	0.9786	0.6301	0.2464
0.7	0.3	0.489265	0.209414	0.210735	0.090586	1		0.698679	0.301321	1		2	0.35	1.83	0.9648	0.3566
0.8	0.2	0.55916	0.139609	0.24084	0.0603907	1		0.698769	0.301231	1		3	0.34	1.81	0.9787	0.6145	0.2067
0.9	0.1	0.629055	0.0698047	0.270945	0.0301953	1		0.69886	0.30114	1		3	0.32	1.82	0.9707	0.6172	0.198
Sample	Site	Coverage	Cellularity (Estimated+Pathologist)	Normal Contamination
DG1136e	Right Ovary Site 3	31.8637	0.69895	0.30105
DG1136g	Right Ovary Site 4	29.5289	0.698047	0.301953

## Sheet: c) Pairwise Merge
Individual										Merge					TITAN Results
Sample1	Sample2	% of 1	% of 2	% tumour of 1	% tumour of 2	% normal of 1	% normal of 2	Total		% tumour	% normal	Total	Coverage		Number of Clusters	Normal Proportion, n	Average Tumour Ploidy	Cluster 1	Cluster 2	Cluster 3	Cluster 4
a	c	0.494347	0.505653	0.308681	0.221639	0.185666	0.284014	1		0.53032	0.46968	1	68.6235		3	0.44	1.88	0.9665	0.6805	0.4688
a	e	0.515657	0.484343	0.321988	0.338531	0.19367	0.145811	1		0.660519	0.339481	1	65.7875		3	0.29	1.88	0.9534	0.634	0.4598
a	g	0.534631	0.465369	0.333835	0.324849	0.200796	0.14052	1		0.658684	0.341316	1	63.4527		4	0.37	1.85	0.9771	0.7245	0.4739	0.203
a	i	0.490199	0.509801	0.306091	0.280352	0.184108	0.229449	1		0.586443	0.413557	1	69.2041		2	0.47	1.86	0.9655	0.5684
c	e	0.521303	0.478697	0.228499	0.334585	0.292804	0.144112	1		0.563084	0.436916	1	66.5634		3	0.43	1.9	0.958	0.6955	0.4313
c	g	0.540253	0.459747	0.236805	0.320925	0.303448	0.138822	1		0.55773	0.44227	1	64.2286		2	0.5	1.89	0.9652	0.41
c	i	0.495851	0.504149	0.217343	0.277244	0.278509	0.226905	1		0.494587	0.505413	1	69.98		2	0.59	1.87	0.9656	0.5406
e	g	0.519015	0.480985	0.362765	0.33575	0.156249	0.145235	1		0.698515	0.301485	1	61.3926		2	0.36	1.86	0.9771	0.4435
e	i	0.474557	0.525443	0.331692	0.288954	0.142865	0.236489	1		0.620646	0.379354	1	67.144		3	0.45	1.88	0.9621	0.7012	0.4705
g	i	0.455628	0.544372	0.31805	0.299364	0.137579	0.245008	1		0.617413	0.382587	1	64.8093		2	0.53	1.83	0.9769	0.4477

## Sheet: d) Triplet Merge
Individual														Merge					TITAN results
Sample1	Sample2	Sample3	% of 1	% of 2	% of 3	% tumour of 1	% tumour of 2	% tumour of 3	% normal of 1	% normal of 2	% normal of 3	Total		% tumour	% normal	Total	Coverage		Number of Clusters	Normal Proportion, n	Average Tumour Ploidy	Cluster 1	Cluster 2	Cluster 3	Cluster 4	Cluster 5
a	c	e	0.337593	0.345315	0.317092	0.2108	0.151359	0.221631	0.126793	0.193956	0.0954605	1		0.583791	0.416209	1	100.487		3	0.38	1.89	0.9513	0.6612	0.4721
a	c	g	0.345624	0.353529	0.300848	0.215815	0.15496	0.210006	0.129809	0.198569	0.090842	1		0.58078	0.41922	1	98.1524		4	0.42	1.86	0.9519	0.7321	0.5128	0.1866
a	c	i	0.326492	0.33396	0.339548	0.203869	0.146382	0.186726	0.122623	0.187578	0.152822	1		0.536977	0.463023	1	103.904		5	0.47	1.89	0.9207	0.7928	0.6228	0.4725	0.2944
a	e	g	0.355907	0.334294	0.309799	0.222236	0.233655	0.216254	0.133671	0.100639	0.0935449	1		0.672145	0.327855	1	95.3164		5	0.33	1.86	0.9576	0.7653	0.5057	0.3948	0.1488
a	e	i	0.335654	0.31527	0.349076	0.209589	0.220358	0.191966	0.126064	0.0949121	0.15711	1		0.621913	0.378087	1	101.068		2	0.41	1.87	0.9641	0.4961
a	g	i	0.343591	0.299078	0.357331	0.214546	0.208771	0.196505	0.129045	0.0903078	0.160826	1		0.619821	0.380179	1	98.7331		4	0.45	1.83	0.9705	0.7845	0.4525	0.2191
c	e	g	0.361108	0.331594	0.307298	0.158282	0.231768	0.214508	0.202826	0.0998265	0.0927896	1		0.604558	0.395442	1	96.0923		3	0.41	1.88	0.9513	0.7081	0.2274
c	e	i	0.340715	0.312868	0.346416	0.149343	0.218679	0.190503	0.191372	0.094189	0.155913	1		0.558526	0.441474	1	101.844		3	0.48	1.87	0.9563	0.7183	0.286
c	g	i	0.348709	0.296746	0.354544	0.152847	0.207143	0.194973	0.195862	0.0896036	0.159572	1		0.554963	0.445037	1	99.509		2	0.54	1.87	0.9652	0.3535
e	g	i	0.329603	0.305452	0.364945	0.230376	0.21322	0.200693	0.0992269	0.0922323	0.164253	1		0.644288	0.355712	1	96.6729		4	0.42	1.84	0.9495	0.764	0.4958	0.2287
