# Supplementary material for: TITAN: inference of copy number architectures in clonal cell populations from tumor whole-genome sequence data
Source: HighWire-hosted journal article supplement (doi:10.1101/gr.180281.114), 2014-07-24
Supplement: TITAN_Supp_Tables.zip [file table_S7.xlsx]

## Sheet: A) TNBC TITAN parameters
Sample	Number of Clusters	Normal Proportion, n	Average Tumour Ploidy	Cluster 1	Cluster 2	Cluster 3	Cluster 4	Cluster 5	Cluster 6
SA028	3	0.14	2.27	0.9457	0.7429	0.4873
SA029	1	0.59	1.68	0.9574
SA030	6	0.41	1.64	0.9834	0.6874	0.5293	0.4651	0.351	0.2289
SA052	4	0.17	1.77	0.9624	0.5335	0.3893	0.1717
SA065	2	0.2	2.27	0.9582	0.6525
SA073	2	0.51	1.54	0.9583	0.5323
SA219	3	0.49	1.58	0.9944	0.6761	0.4315
SA220	1	0.41	1.63	0.9694
SA221	5	0.11	2.28	0.9826	0.5586	0.4503	0.3705	0.2911
SA223	4	0.01	1.49	0.9316	0.7149	0.4228	0.2683
SA224	3	0.28	1.52	0.9299	0.6672	0.4454
SA225	1	0.2	1.76	0.9722
SA227	3	0.33	1.74	0.9605	0.7193	0.4351
SA231	2	0.16	1.66	0.9718	0.5071
SA232	1	0.63	1.62	0.9408
SA233	1	0.7	1.59	0.92
SA235	3	0.47	1.63	0.9828	0.7024	0.3368
SA236	3	0.27	1.55	0.9435	0.6573	0.4041
SA237	3	0.48	1.88	0.9621	0.7404	0.2696
SA238	5	0.48	2.02	0.9845	0.8615	0.7112	0.5305	0.3303
SA239	2	0.52	1.63	0.9606	0.581
SA299	5	0	2.14	1	0.479	0.3673	0.3007	0.2077
SA300	5	0.38	1.72	0.9278	0.7331	0.5486	0.3971	0.2611

## Sheet: B) TNBC % genome altered
Sample	% genome altered by clonal events	% genome altered by subclonal events
SA028	0.581857	0.358824
SA029	0.473608	0
SA030	0.251129	0.498419
SA052	0.10143	0.559332
SA065	0.720482	0.241694
SA073	0.311223	0.591389
SA219	0.258791	0.621919
SA220	0.669838	0
SA221	0.0324824	0.91109
SA223	0.138809	0.782415
SA224	0.420068	0.491116
SA225	0.617302	0
SA227	0.41934	0.50692
SA231	0.54869	0.182841
SA232	0.773954	0
SA233	0.604905	0
SA235	0.0555683	0.773537
SA236	0.489897	0.354446
SA237	0.432275	0.219035
SA238	0.0633996	0.458254
SA239	0.546154	0.0634917
SA299	0.0120215	0.964546
SA300	0.0669657	0.721218
