# Supplementary material for: TITAN: inference of copy number architectures in clonal cell populations from tumor whole-genome sequence data
Source: HighWire-hosted journal article supplement (doi:10.1101/gr.180281.114), 2014-07-24
Supplement: TITAN_Supp_Tables.zip [file table_S9.xlsx]

## Sheet: a) FISH_probes
FISH probes used for validation of (sub)clonal deletions and gains
Groups 1-5 assays for DG1136g
Group 6 assay for DG1136c
Group 1
Event ID	Probe ID	Coordinates	Colour
SC-DLOH-1	RP11-159J14	chr1:69454844-69606688	Green
Control	RP11-795A13	chr1:69851036-70025173	Orange
Group 2
Event ID	Probe ID	Coordinates	Colour
SC-GAIN-1	RP11-829F10	chr2:14310764-30170111	Green
SC-DLOH-3	RP11-462D13	chr2:59422756-71834123	Blue
Control	CEP 2		Orange
Group 3
Event ID	Probe ID	Coordinates	Colour
SC-DLOH-4	RP11-1005P9	chr7:145530552-145724648	Orange
Control	CEP 7		Blue
Group 4
Event ID	Probe ID	Coordinates	Colour
SC-DLOH-5	RP11-49J9	chr21:22060503-22231762	Green
Control	RP11-632H15	chr21:20742595-20912882	Orange
Control	RP11-1149O16	chr21:27104756-27246972	Blue
Group 5
Event ID	Probe ID	Coordinates	Colour
Control	RP11-147K16	chr17: 3294803-3452243	Orange
C-NLOH-1	RP11-982O5	chr17:55475584-55662513	Blue
C-DLOH-1	CEP 17		Green
Group 6
Event ID	Probe ID	Coordinates	Colour
SC-GAIN-2	RP11-641E2	chr17: 3294803-3452243	Green
Control	CEP 11		Orange

## Sheet: b) Chr1_FISH
Group1: SC-DLOH-1 (DG1136g)
	Control	Deletion
#	SpGr	SpOr
	RP11-159J14	RP11-795A13
	1p31.2	1p31.1
1	2	1
2	2	2
3	2	1
4	2	1
5	2	1
6	1	0
7	2	1
8	2	1
9	3	2
10	1	1
11	1	1
12	2	2
13	2	1
14	2	1
15	2	1
16	2	1
17	1	1
18	2	1
19	2	1
20	2	2
21	1	1
22	1	1
23	2	1
24	2	1
25	2	1
26	2	1
27	1	1
28	2	1
29	2	1
30	2	1
31	1	1
32	1	1
33	2	1
34	2	2
35	1	1
36	2	1
37	2	2
38	3	1
39	2	1
40	2	1
41	4	2
42	6	1
43	3	2
44	2	0
45	4	2
46	2	1
47	2	1
48	2	1
49	1	1
50	2	1
51	2	1
52	3	1
53	2	1
54	1	0
55	2	1
56	2	1
57	2	0
58	3	1
59	4	2
60	2	1
61	1	1
62	3	1
63	2	1
64	2	1
65	2	2
66	2	1
67	2	1
68	4	1
69	1	0
70	1	0
71	2	1
72	2	1
73	2	1
74	4	1
75	3	1
76	3	1
77	2	1
78	2	1
79	2	1
80	2	1
81	3	2
82	2	1
83	2	1
84	2	1
85	3	1
86	2	1
87	2	0
88	2	2
89	1	0
90	2	2
91	2	2
92	2	2
93	2	2
94	2	2
95	2	2
96	2	1
97	2	1
98	2	1
99	4	2
100	2	1
101	2	2
102	2	2
103	1	1
104	2	2
105	1	1
106	1	1
107	1	1
108	2	2
109	2	2
110	1	1
111	2	2
112	2	2
113	2	2
114	2	2
115	2	2
116	2	2
117	2	2
118	2	2
119	1	1
120	2	2
121	2	2
122	1	1
123	2	1
124	2	2
125	2	2
126	1	1
127	2	1
128	1	1
129	2	1
130	1	1
131	2	2
132	2	1
133	2	2
134	2	2
135	2	2
136	1	1
137	1	1
138	2	1
139	1	1
140	2	1
141	2	2
142	2	2
143	1	1
144	1	1
145	2	2
146	1	1
147	1	1
148	2	2
149	2	2
150	2	2
151	2	2
152	2	2
153	2	2
154	1	1
155	2	2
156	2	2
157	2	2
158	1	1
159	2	2
160	2	2
161	2	2
162	2	2
163	1	2
164	2	2
165	2	2
166	1	1
167	3	2
168	2	2
169	2	2
170	2	2
171	1	1
172	1	1
173	2	2
174	2	2
175	2	2
176	2	1
177	2	2
178	1	1
179	2	2
180	2	1
181	1	1
182	2	1
183	2	1
184	1	1
185	2	1
186	2	1
187	2	1
188	2	1
189	2	1
190	2	1
191	2	1
192	2	2
193	2	2
194	2	1
195	2	2
196	2	2
197	2	2
198	2	2
199	2	2
200	2	2

## Sheet: c) Chr2_FISH
Group2: SC-GAIN-2 and SC-DLOH-3 (DG1136g)
	Gain	Deletion	Control
#	SpGr	Alexa 647	SpOr
	RP11-829F10	RP11-462D13	CEP 2
	2p23.2	2p16.1
1	3	3	3
2	3	2	2
3	1	2	1
4	2	2	2
5	1	1	2
6	2	1	1
7	2	2	2
8	1	1	1
9	2	2	2
10	4	4	4
11	2	0	1
12	1	1	1
13	1	1	3
14	1	1	1
15	2	1	2
16	2	1	3
17	3	5	2
18	2	1	3
19	1	1	2
20	2	1	3
21	2	1	3
22	2	1	2
23	2	1	1
24	4	2	1
25	5	2	2
26	3	3	3
27	3	2	2
28	2	2	2
29	4	2	1
30	3	1	2
31	2	2	2
32	2	2	2
33	1	1	2
34	3	0	2
35	4	2	2
36	2	1	1
37	2	1	2
38	5	2	4
39	3	2	2
40	2	3	3
41	1	2	1
42	4	2	2
43	1	2	1
44	3	2	2
45	2	2	3
46	2	1	2
47	2	2	2
48	1	1	1
49	4	2	3
50	2	2	1
51	4	2	2
52	3	2	2
53	4	1	2
54	1	1	1
55	2	1	2
56	1	1	2
57	1	0	2
58	1	1	2
59	2	1	2
60	2	1	1
61	2	1	2
62	2	2	1
63	2	2	2
64	2	1	2
65	2	1	2
66	2	1	2
67	2	1	2
68	1	1	2
69	2	1	1
70	1	0	2
71	2	1	2
72	2	1	2
73	2	0	2
74	2	2	3
75	2	2	2
76	2	2	1
77	2	1	1
78	3	2	3
79	2	1	3
80	2	1	1
81	2	4	2
82	3	3	2
83	2	1	1
84	1	1	1
85	0	1	1
86	3	1	1
87	3	3	2
88	2	2	2
89	2	1	2
90	2	1	1
91	4	1	4
92	2	1	2
93	2	1	2
94	2	1	2
95	2	1	2
96	2	1	2
97	3	1	2
98	2	1	2
99	4	2	3
100	3	2	3

## Sheet: d) Chr7_FISH
Group3: SC-DLOH-4 (DG1136g)
#	SpOr	SpAq
	RP11-1005P9	CEP 7
	7q35
1	2	2
2	2	2
3	2	2
4	2	1
5	1	3
6	1	2
7	1	2
8	2	2
9	2	1
10	1	1
11	1	1
12	1	2
13	1	2
14	1	2
15	2	1
16	2	1
17	2	2
18	1	2
19	2	2
20	1	2
21	2	2
22	1	2
23	1	2
24	4	2
25	2	2
26	2	2
27	2	2
28	2	2
29	2	1
30	1	4
31	2	1
32	1	2
33	3	2
34	1	1
35	1	0
36	4	3
37	3	3
38	3	2
39	1	1
40	2	1
41	1	2
42	2	4
43	1	2
44	2	2
45	2	2
46	2	2
47	2	2
48	2	2
49	2	1
50	3	0
51	2	2
52	1	0
53	1	1
54	1	2
55	1	1
56	1	2
57	2	2
58	1	2
59	2	3
60	1	2
61	3	4
62	2	2
63	2	2
64	4	3
65	1	1
66	2	2
67	2	2
68	2	2
69	2	2
70	2	2
71	2	2
72	2	1
73	2	2
74	1	2
75	2	2
76	2	2
77	1	2
78	1	2
79	2	2
80	2	2
81	2	2
82	2	2
83	2	2
84	2	2
85	1	1
86	2	2
87	2	2
88	2	2
89	2	2
90	2	2
91	1	1
92	1	1
93	2	2
94	2	3
95	2	1
96	2	2
97	2	2
98	2	2
99	1	1
100	2	2

## Sheet: e) Chr21_FISH
Group4: SC-DLOH-5 (DG1136g)
	Deletion	Control	Control
#	SpGr	Alexa 647	SpOr
	RP11-49J9	RP11-1149O16	RP11-632H15
	21q21.1	21q21.3	21q21.1
1	2	2	2
2	2	2	2
3	2	2	2
4	2	2	2
5	2	2	2
6	2	2	2
7	2	2	2
8	1	1	1
9	1	1	1
10	2	2	2
11	2	2	2
12	1	1	1
13	1	1	1
14	1	1	1
15	2	2	2
16	1	1	1
17	2	2	2
18	2	1	2
19	2	2	2
20	2	2	2
21	2	2	2
22	2	2	2
23	2	2	2
24	2	2	2
25	1	1	1
26	2	2	2
27	1	1	1
28	1	1	1
29	1	1	1
30	1	1	1
31	1	1	1
32	1	1	1
33	1	1	1
34	1	1	1
35	1	2	1
36	1	1	1
37	1	1	1
38	1	1	1
39	1	1	1
40	1	1	1
41	1	1	1
42	1	1	1
43	2	2	2
44	2	2	2
45	2	2	2
46	1	1	1
47	2	2	2
48	1	2	1
49	2	2	2
50	2	2	2
51	2	2	2
52	2	2	2
53	2	2	2
54	2	2	2
55	2	2	2
56	2	2	2
57	1	1	1
58	2	2	2
59	2	2	2
60	1	2	1
61	2	2	2
62	2	2	2
63	2	2	2
64	2	2	2
65	2	1	2
66	2	2	2
67	2	2	2
68	3	3	3
69	2	2	2
70	2	2	2
71	2	2	2
72	2	2	2
73	2	2	2
74	2	0	2
75	3	2	3
76	2	2	2
77	2	2	2
78	2	2	2
79	1	2	2
80	1	1	1
81	1	1	2
82	2	2	1
83	2	2	2
84	2	2	2
85	2	2	2
86	1	2	2
87	2	2	2
88	2	2	2
89	2	2	2
90	1	1	1
91	1	2	2
92	2	2	2
93	2	2	2
94	1	1	1
95	2	2	2
96	1	1	1
97	2	2	2
98	2	2	2
99	1	2	1
100	2	2	2

## Sheet: f) Chr17_FISH
Group5: C-DLOH-1 (DG1136g)
	Control	Control	Deletion
#	SpOr	Alexa647	SpGr
	RP11-147K16	RP11-982O5	CEP17
1	2	2	1
2	2	2	2
3	2	2	1
4	2	2	1
5	2	2	1
6	2	2	1
7	2	2	1
8	2	2	1
9	2	1	1
10	2	2	1
11	2	2	1
12	2	2	1
13	2	2	1
14	2	1	1
15	4	4	2
16	3	4	1
17	4	7	4
18	4	4	1
19	4	4	3
20	1	2	1
21	1	1	0
22	3	2	1
23	3	4	1
24	2	2	1
25	3	2	1
26	2	1	1
27	2	2	1
28	1	2	1
29	3	3	1
30	1	3	1
31	2	1	1
32	1	1	1
33	2	2	1
34	0	2	1
35	2	1	1
36	1	1	1
37	1	2	1
38	1	2	1
39	2	3	1
40	1	3	1
41	2	3	1
42	2	2	1
43	2	2	1
44	3	3	1
45	2	3	1
46	1	3	1
47	2	4	1
48	2	3	1
49	1	1	1
50	2	2	1
51	2	2	1
52	1	2	1
53	1	2	1
54	2	0	2
55	2	2	2
56	3	3	2
57	2	2	1
58	3	3	1
59	5	3	2
60	2	1	1
61	1	2	1
62	2	2	0
63	1	1	1
64	2	4	1
65	3	1	1
66	5	3	1
67	1	1	1
68	3	2	1
69	3	2	1
70	2	2	1
71	2	2	1
72	3	1	1
73	2	2	1
74	3	2	1
75	1	2	1
76	3	2	1
77	2	4	2
78	2	2	1
79	1	1	1
80	0	2	1
81	1	1	1
82	0	1	1
83	1	2	2
84	2	2	2
85	3	2	1
86	1	2	1
87	3	4	2
88	2	2	1
89	3	3	1
90	2	2	1
91	2	2	1
92	1	2	1
93	3	2	1
94	2	2	1
95	3	2	1
96	3	1	1
97	1	3	1
98	1	4	1
99	1	2	1
100	2	2	3

## Sheet: g) Chr11_FISH
Group6: SC-GAIN-2 (DG1136c)
#	SpGr	SpOr
	RP11-641E2	CEP 11
	11q13.1
1	2	2
2	3	2
3	3	1
4	2	1
5	2	1
6	3	2
7	2	1
8	2	1
9	2	2
10	2	2
11	2	1
12	3	2
13	5	2
14	3	2
15	2	1
16	2	2
17	3	2
18	1	2
19	1	3
20	3	2
21	2	1
22	1	1
23	1	1
24	2	2
25	4	1
26	3	2
27	3	2
28	2	2
29	2	2
30	1	2
31	3	2
32	1	1
33	2	1
34	3	2
35	4	1
36	2	1
37	2	2
38	3	1
39	2	0
40	2	2
41	1	1
42	0	1
43	3	2
44	3	2
45	3	2
46	1	1
47	1	2
48	2	2
49	3	1
50	3	2
51	2	1
52	4	2
53	3	2
54	2	2
55	3	2
56	3	2
57	0	1
58	5	1
59	3	2
60	3	1
61	4	1
62	1	2
63	1	2
64	1	2
65	3	2
66	2	2
67	3	2
68	3	2
69	3	2
70	3	1
71	2	1
72	2	0
73	3	2
74	4	2
75	2	2
76	5	2
77	3	2
78	3	1
79	1	2
80	3	2
81	3	2
82	4	3
83	2	2
84	3	2
85	4	1
86	2	2
87	2	2
88	2	1
89	1	1
90	3	2
91	2	2
92	2	2
93	4	2
94	3	2
95	4	2
96	2	2
97	2	1
98	2	2
99	1	1
100	3	2

## Sheet: h) Summary
	Raw cell counts					Event Ratios						FFPE
	Group 1 - Chr1					Group 1 - Chr1
	Control	SC-DLOH-1				SC-DLOH-1 ratio
	RP11-159J14	RP11-795A13				RP11-795A13 / RP11-159J14
Loss	42	123			Loss	95
Neutral	140	77			Neutral	104
Gain	18	0			Gain	1
					Cell Prev	0.475
	Group 2 - Chr2					Group 2 - Chr2						FFPE
	SC-GAIN-1	SC-DLOH-3	Control			SC-GAIN-1 ratio	SC-DLOH-3 ratio					Gain	Deletion
	RP11-829F10	RP11-462D13	CEP2			RP11-829F10 / CEP2	RP11-462D13 / CEP2					RP11-829F10	RP11-462D13
Loss	19	58	26		Loss	18	48					0	0
Neutral	53	34	56		Neutral	47	40					22	25
Gain	28	8	18		Gain	35	12					18	15
					Cell Prev	0.35	0.48					0.45	0
	Group 3 - Chr7					Group 3 - Chr7						FFPE
	SC-DLOH-4	Control				SC-DLOH-4 ratio						Deletion	Control	Deletion ratio
	RP11-1005P9	CEP7				RP11-1005P9 / CEP7						RP11-1005P9	CEP7	RP11-1005P9_vs_CEP7
Loss	34	24			Loss	25						16	2	14
Neutral	58	67			Neutral	57						21	36	23
Gain	8	9			Gain	15						2	1	2
					Cell Prev	0.257732						0.410256		0.358974
	Group 4 - Chr21					Group 4 - Chr21						FFPE
	SC-DLOH-5	Control	Control			The controls appear to also be deleted and part of the same event (SC-DLOH-5).						Deletion	Event31	Deletion ratio
	RP11-49J9	RP11-1149O16	RP11-632H15									RP11-49J9	RP11-88P14	RP11-49J9_vs_RP11-88P14
Loss	36	32	33		Loss							8	1	16
Neutral	62	67	65		Neutral							20	23	18
Gain	2	1	2		Gain							12	16	6
					Cell Prev							0.2		0.4
	Group 5 - Chr17					Group 5 - Chr17
	Control	C-NLOH-1	C-DLOH-1			C-DLOH-1 ratio	C-DLOH-1 ratio
	RP11-147K16	RP11-982O5	CEP17			CEP17 / RP11-147K16	CEP17 / RP11-982O5
Loss	28	19	87		Loss	64	75
Neutral	46	55	10		Neutral	29	21
Gain	26	26	3		Gain	5	2
					Cell Prev	0.653061	0.765306
	Group 6 - Chr11					Group 6 - Chr11
	SC-GAIN-2	Control				SC-GAIN-2 ratio
	RP11-641E2	CEP 11				RP11-641E2 / CEP 11
Loss	17	35			Loss	10
Neutral	35	63			Neutral	27
Gain	48	2			Gain	61
					Cell Prev	0.622449
